# Supplementary material
Source: PubMed Central journal article supplement (PMC9383269)
Supplement: NIHMS1828607-supplement-Materials_and_Methods.pdf [file NIHMS1828607-supplement-Materials_and_Methods.pdf]

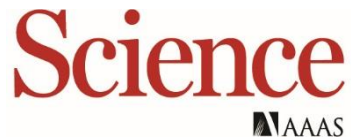

## Supplementary Materials for

### **Single-nucleus cross-tissue molecular reference maps toward understanding disease gene function**

Gökçen Eraslan *et al.*

Corresponding authors: Ayellet V. Segrè, [ayellet\\_segre@meei.harvard.edu](mailto:ayellet_segre@meei.harvard.edu); François Aguet, [francois@broadinstitute.org](mailto:francois@broadinstitute.org); Orit Rozenblatt-Rosen, [orit.r.rosen@gmail.com](mailto:orit.r.rosen@gmail.com); Kristin G. Ardlie, [kardlie@broadinstitute.org](mailto:kardlie@broadinstitute.org); Aviv Regev, [aviv.regev.sc@gmail.com](mailto:aviv.regev.sc@gmail.com)

*Science* **376**, eabl4290 (2022)  
DOI: 10.1126/science.abl4290

#### **The PDF file includes:**

Materials and Methods  
Supplementary Text  
Figs. S1 to S35  
References

#### **Other Supplementary Material for this manuscript includes the following:**

Tables S1 to S20  
MDAR Reproducibility Checklist

## **Materials and Methods**

### **Methods**

#### **Biospecimens**

##### **Donor and sample characteristics**

All samples were selected from donors that were enrolled as part of the GTEx project. As previously described (7), all GTEx tissue samples were derived from deceased donors, with study authorization obtained via next-of-kin consent for the collection and banking of de-identified tissue samples for scientific research.

While the vast majority of tissues collected from GTEx donors were preserved in PAXgene fixative (180), which is not compatible for scRNA-seq, a subset of duplicate samples were collected from 8 tissue sites (Breast – Mammary tissue, Esophagus – Mucosa, Esophagus – Muscularis, Heart – Left Ventricle, Lung, Muscle – Skeletal, Prostate, and Skin – Sun Exposed (Lower leg)) and flash frozen. We selected 3-4 samples from each of the 8 tissues that satisfied the following criteria: (1) both genders and all available ancestral/ethnic groups are represented; (2) approximately span the age range collected for GTEx (21-70 years old); (3) RNA quality from the matched PAXgene-preserved tissue fulfilled GTEx requirements for bulk RNA-Seq ( $RIN \geq 5.5$ ); and (4) RNA-seq (from bulk matched tissue) and a donor genotype (from Whole Genome Sequencing) were available.

All GTEx samples underwent pathology review as part of that study protocol (180), to validate tissue origin, content, and integrity. Tissues were also reviewed for evidence of any disease (cancer, infectious disease, inflammatory disease) to confirm that collected biospecimens were “normal” or non-diseased and were acceptable for inclusion in the GTEx inventory and study. For



the samples selected for this study, we performed a second pathology review to provide greater detail about the broad cellular makeup of each tissue sample (**table S1**). The accompanying H&E images for each sample are available on the GTEx portal Histology Viewer (<http://gtexportal.org/home/histologyPage>).

### **Sample processing**

Approximately 400mg of frozen tissue was obtained from each sample to allow the application of multiple nucleus extraction methods. 20-50 mg of tissue was cut per preparation. For donor pooling, ~10-15 mg of tissue from each donor were combined. Tissue remained frozen during cutting and weighing.

Each tissue sample was prepared as previously described for the EZ, CST, NST and TST protocols (26). Briefly, each tissue piece was subjected to nucleus isolation and snRNA-Seq, using each of the four conditions, with either commercial EZ buffer and mechanical breakdown using douncing (19) (EZ), or with nucleus isolation in salt-Tris buffer with detergent, either NP-40, CHAPS, or Tween-20 (NST, CST and TST receptively), with chopping to assist mechanical breakdown of the tissue (26).

For the CST, NST, TST isolations: On ice, each piece of frozen tissue was placed into one well of a 6-well plate with salt-Tris buffer containing 146 mM NaCl (Cat#S6546-1L, Sigma-Aldrich), 1 mM CaCl<sub>2</sub> (Cat#97062-820, VWR), 21 mM MgCl<sub>2</sub> (Cat#M1028-10X1ML, Sigma-Aldrich), 10 mM Tris pH 8.0 (CAT#AM9855G, Thermo Fisher Scientific), supplemented with detergent: CHAPS (Cat#220201-1GM, EMD Millipore) at 0.49% (w/v), Tween20 (Cat#100216-360, VWR) at 0.03% (w/v), or Nonidet™ P40 Substitute (Cat#AAJ19628AP, Fisher Scientific) at 0.02%

(w/v). Tissue was then chopped with Tungsten Carbide Straight 11.5 cm Fine Scissors (14558-11, Fine Science Tools, Foster City, CA) for 10 min on ice. Samples were then filtered through a 40  $\mu$ m Falcon cell strainer (Thermo Fisher Scientific, cat. no. 08-771-1) into a 50ml conical tube. The well and filter were washed with an additional 1 ml of detergent-buffer solution, followed by a wash with 3ml of buffer without detergent. The  $\sim$  5 ml sample volume was then transferred to a 15 ml conical tube and centrifuged for 5 minutes, 500g at 4°C in a swinging bucket centrifuge with soft break. Following centrifugation, the sample was placed on ice, supernatant was removed carefully, and the pellet was resuspended in salt-Tris buffer without detergent. The nucleus solution was then filtered through a 35  $\mu$ m Falcon cell strainer (Corning, cat. no. 352235). Nuclei were counted, and 7,000 nuclei of the single-nucleus suspension were loaded onto the Chromium Chips for the Chromium Single Cell 3' Library (V2, PN-120233) according to the manufacturer's recommendations (10x Genomics). Mouse tissues were prepared using the CST nucleus isolation protocol.

For the EZ protocol: Tissue samples were cut into pieces <0.5 cm and homogenized using a glass Dounce tissue grinder (Sigma, cat. no. D8938). The tissue was homogenized 20 times with pestle A and 20 times with pestle B in 2 ml of ice-cold nuclei EZ lysis buffer (NUC101-1KT, Sigma-Aldrich). Then, a volume of 3 ml of cold EZ lysis buffer was added, and sample was incubated on ice for 5 min. Sample was then centrifuged at 500g for 5 min at 4 °C, washed with 5 ml ice-cold EZ lysis buffer and incubated on ice for 5 min. After additional centrifugation as in the previous step, supernatant was removed and the nucleus pellet was washed with 5 ml nuclei suspension buffer (NSB; consisting of 1X PBS, 0.01% BSA and 0.1% RNase inhibitor (Clontech, cat. no. 2313A)). Isolated nuclei were resuspended in 2 ml NSB, filtered through a 35  $\mu$ m cell strainer

(Corning-Falcon, cat. no. 352235) and counted. A final concentration of 1,000 nuclei per  $\mu\text{l}$  was used for loading on a 10x V2 channel.

### **snRNA-seq library preparation and sequencing**

Nuclei were partitioned into Gel Beads in Emulsion (GEMs) using the GemCode instrument. Lysis and barcoded reverse transcription of RNA occurred in GEMs, followed by amplification, shearing and adaptor and sample index attachment according to the manufacturer's protocol (10x Genomics). Libraries were sequenced on an Illumina HiSeq X or NextSeq.

### **snRNA-seq data pre-processing**

Raw sequence files were demultiplexed into the fastq format using the *cellranger mkfastq* command (*Cell Ranger* v2.1.0, 10X Genomics). A custom pre-mRNA reference genome was generated including both introns and exons using the commands recommended by 10X's Cell Ranger pipeline (<https://support.10xgenomics.com/single-cell-gene-expression/software/pipelines/latest/advanced/references>). The "cellranger count" command was used to generate gene expression matrices.

To remove ambient RNA (16, 30, 168, 181), we used *CellBender* (30) v2's probabilistic model to generate corrected gene expression matrices after ambient removal. *CellBender* was run on a *Terra* cloud computing environment (<https://app.terra.bio>) on all raw gene expression matrices using the *remove-background-v2-alpha* workflow with FPR=0.01 option. The total number of nuclei identified by CellBender was 439,772.

Following ambient RNA correction, we removed “low-quality” nucleus profiles defined as those with either <200 detected genes, >5,000 detected genes, or <400 UMIs, retaining 265,831 nuclei passing QC. Protocol- and individual-specific clusters and the clusters with high predicted doublet proportions and mixed marker sets were removed manually retaining 209,126 nuclei for all subsequent analyses.

### **Estimation of exon:intron ratios**

We computed exon:intron ratios from read counts in exonic, intronic, and intergenic regions obtained with Scrinvex (<https://github.com/getzlab/scrinvex>) applied to the processed BAM-file. First, a collapsed annotation file was created using the “genes.gtf” created in the Cell Ranger v2 reference using the GTEx collapse annotation script ([https://github.com/broadinstitute/gtex-pipeline/tree/master/gene\\_model](https://github.com/broadinstitute/gtex-pipeline/tree/master/gene_model)). Then, Scrinvex was run as “scrinvex  $\{\text{collapsed\_gtf}\}$   $\{\text{cellranger\_bam}\}$  -b  $\{\text{barcodes}\}$  -o  $\{\text{out\_file}\}$  -s  $\{\text{summary\_file}\}$ ” where cellranger\_bam and barcodes are output from cellranger count.

### **Data harmonization using disentangled conditional VAEs**

We used a conditional  $\beta$ -TCVAE (total correlation variational autoencoder) (*182*) to obtain disentangled representation of cells, while simultaneously factoring out unwanted sources of biological and technical variation (age, sex, self-reported ethnicity, nucleus isolation protocol, and ischemic time) from the latent representation of cells via conditioning. Python source code of  $\beta$ -TCVAE implemented by Yann Dubois (<https://github.com/YannDubs/disentangling-vae>) was adapted for tabular single-cell data by adding fully connected encoder and decoder layers. Furthermore, we added the conditioning support for continuous and categorical variables.

Conditional  $\beta$ -TCVAE with 64 latent dimensions was applied to  $\log(\text{TP10K}+1)$ -transformed counts after subsetting the genes to 10,000 highly variable protein coding genes. Age, sex, nucleus isolation protocol, ischemic time and self-reported race/ethnicity were used for conditioning. We fitted the model on the entire dataset with beta values 1 (where  $\beta$ -TCVAE reduces to a standard cVAE), 2, 3, 5 and 10. Higher beta values lead to over-smoothed reconstructions and higher loss of variation in the data (**fig. S3**). To minimize the loss of structure in the UMAP embeddings of nuclei and to keep the distinctness of tissue-specific neighborhoods, we used  $\beta=2.0$  as a final hyperparameter. We used a softplus output activation to produce non-negative outputs. Mean squared error (MSE) was used as a loss function. UMAP embeddings and  $k$ -nearest neighbors ( $k$ -NN) graph-based clusters were inferred using a 15-nearest neighbor graph built with the mean VAE latent space embeddings of the nuclei profiles using `sc.pp.neighbors()`, `sc.tl.umap()` and `sc.tl.leiden()` functions of Scanpy (183).

### **Benchmarking integration methods**

The cVAE integration was compared with Harmony (184), MNN (185) and BBKNN (186) by several metrics. MNN (185) (Python implementation by Chris Kang, <https://github.com/chrisainx/mnnpypy/>, version 0.1.9.5) and BBKNN (186) (<https://github.com/Teichlab/bbknn>, version 1.5.1) were run on 2,000 highly variable genes. The PyTorch implementation of Harmony (184) (<https://github.com/lilab-bcb/harmony-pytorch>, version 0.1.3) was run on 50 PCs that were fitted using 2,000 highly variable genes. cVAEs with 8, 64 and 256 latent variables were trained on 5,000 highly variable genes. Each method was run on the entire dataset five times with random seeds and used “channel” as a batch variable. For MNN, Harmony and cVAE, a  $k$ -nearest neighbor ( $k$ -NN) graph was built with  $k=30$  neighbors. The graph-representation output of BBKNN was used. Graph-based clustering (Leiden) was

performed with resolution of 1.0 on the uncorrected data and data corrected with four methods. The `sc.pp.highly_variable_genes`, `sc.pp.pca`, `sc.pp.neighbors`, `sc.tl.leiden` functions from Scanpy were used for the identification of highly variable genes, PCA,  $k$ -NN graph construction, and graph-based clustering, respectively. `scib` Python package (187) was used for quantification of the integration performance via adjusted Rand index (ARI), normalized mutual information (NMI) and kBET metrics and for performing MNN and BBKNN methods. kBET was run on the gene expression space for MNN, Harmony-corrected PC space for Harmony,  $k$ -NN representation for BBKNN and the latent space for cVAE.

Our cVAE performed (specifically the variant with 64D latent space) on par with Harmony (184), MNN and BBKNN in conservation of cell type-specific variation based on kBET (188), NMI and ARI metrics (**fig. S4A**). In the runtime comparison, cVAE performed better than all methods (**fig. S4B**) and performed better than Harmony based on NMI and ARI but not as good as MNN and BBKNN. The cVAE performed comparably to Harmony (and both better than MNN and BBKNN) in removal of protocol-, channel- and individual-specific effects based on kBET, NMI and ARI metrics (**fig. S4D**). 64D cVAE obtained higher scores than 8D and 256D cVAEs (**fig. S4A-D**).

### **Mouse skeletal muscle snRNA-seq data pre-processing, integration, and annotation**

After generating the count matrices from the raw files with Cell Ranger (v2.1.0, 10X Genomics), we removed the “low-quality” nucleus profiles defined as those with either <200 detected genes, >5,000 detected genes, or <400 UMIs, retaining 31,904 nuclei passing QC. Processed heart and esophagus mouse snRNA-seq datasets from Drokhlyansky et al. (26) were downloaded from [https://singlecell.broadinstitute.org/single\\_cell/study/SCP1038/the-human-and-mouse-enteric-nervous-system-at-single-cell-resolution](https://singlecell.broadinstitute.org/single_cell/study/SCP1038/the-human-and-mouse-enteric-nervous-system-at-single-cell-resolution). Three muscle datasets were then concatenated.

Similar to the human nuclei profiles, we used a conditional  $\beta$ -TCVAE (182) to correct for mouse- or batch-specific effects. Conditional VAE with 64 latent dimensions was applied to  $\log(\text{TP10K}+1)$ -transformed counts after subsetting the genes to the 10,000 highly variable protein coding genes. We used  $\beta=2.0$  as a hyperparameter with a softplus output activation for non-negative outputs. UMAP embeddings and graph-based clusters were inferred using a 15-nearest neighbor graph built with the mean VAE latent space embeddings of the nuclei profiles using `sc.pp.neighbors()`, `sc.tl.umap()` and `sc.tl.leiden()` functions of Scanpy. After differential expression via the `sc.tl.rank_gene_groups()` function, we manually annotated the clusters by comparing highly expressed genes with the literature-based marker lists.

For muscle disease gene set enrichment, we mapped mouse genes to human genes using the ortholog gene list from NCBI HomoloGene (<https://ftp.ncbi.nih.gov/pub/HomoloGene/current/homologene.data>). Fisher's exact test (implemented in fisher Python package) was used for the enrichment test.

### **Curation of reference genes from prior studies**

To curate a literature-based set of reference genes (**table S3**), we first screened primary literature for cell-types found in histology samples for each targeted region. We then curated, at minimum, 3 marker genes that were identified by a primary experimental method (i.e., FISH) in the human target tissue of interest that overlap with significant, differentially expressed genes (one vs. rest, Welch's t-test). For cell-types that are present in multiple tissues, such as certain immune cell-types or vascular endothelial cells, we included "pan" annotation markers that may have been

found in any one tissue to confirm a nucleus's putative cell-type. Finally, we resort to murine experimental confirmation, if needed (denoted in **table S3** with murine analog gene-name).

### **Data-driven identification of marker genes using differential expression**

Raw counts were converted to  $\log(\text{TP10K}+1)$  values prior to differential expression analysis using the “sc.pp.normalize\_total” and “sc.pp.log1p” functions of Scanpy. After accounting for the protocol- and sex-specific effects using ComBat (189) via “sc.pp.combat” function of Scanpy, we used Welch's t-test for differential expression by running “sc.tl.rank\_genes\_groups” function of Scanpy separately in each tissue where each broad and granular cell type was compared against the rest.

### **Cell type diversity analysis**

Shannon entropy was calculated for each sample or channel across all N broad cell classes, according to the formula  $-\sum_i(p_i \times \log_2(p_i))$ , where  $p_i$  is the proportion of cells in cell class  $i$ . The TST, CST and NST protocols generally had comparable cell-type diversity scores in each tissue, with higher variability in skin, breast, and prostate (variance = 0.243 (skin), 0.585 (breast), 0.38 (prostate), < 0.1 (all other tissues)). Entropy was plotted per sample using the ggplot2 and cowplot R packages, and with the “quasirandom” function from the ggbeeswarm package to avoid overlap of plotted points. We used a linear mixed-effects model (“lmer” function from the lme4 R package) to check for association of entropy with the nuclei preparation protocol.



## Comparison to published heart snRNA-seq

Our snRNA-seq data for heart left ventricle tissues was compared to two published snRNA-seq dataset for the heart left ventricle (33, 34). For Tucker et al. (33), we retrieved a final, annotated Scanpy AnnData object (health\_human\_4chamber\_map\_unnormalized\_V3.h5ad) and raw counts (gene\_sorted-matrix.mtx) from the Broad Institute’s Single Cell Portal at [https://singlecell.broadinstitute.org/single\\_cell/study/SCP498](https://singlecell.broadinstitute.org/single_cell/study/SCP498). *CellBender*-corrected counts for the GTEx and Tucker *et al.* datasets were converted to  $\log(\text{TP10K}+1)$  values using the “sc.pp.normalize\_total” and “sc.pp.log1p” functions of Scanpy. For Litviňuková et al. (34), we subset the normalized, profiled nuclei from their “global” Scanpy AnnData object for the “LV” region available at <https://www.heartcellatlas.org>. Highly variable genes were selected using the parameters in “sc.pp.highly\_variable\_genes” “min\_mean=0.0125”, “max\_mean=3”, and “min\_disp=0.5.” Data were scaled using “sc.pp.scale” and highly variable genes were used for PCA via “sc.tl.pca”. Data were integrated between the three cohorts using Harmony (184). We identified a population of ventricular myonuclei in Litviňuková *et al.* that clustered with our dataset and Tucker *et al.*’s ventricular, cytoplasmic myonuclei. We compared sample proportions as described below in *Proportion Analysis*.

## Identification of contaminant transcripts from ambient RNA

We identified contaminant transcripts (from ambient RNA) by comparing the  $\log(\text{TP10K}+1)$ -transformed expression values before and after the removal of ambient RNA using *CellBender* (30). In the comparison, we calculated the  $L_2$ -norm of the differences between the expression values before and after ambient RNA removal for each gene separately. We used the `linalg.norm` function from the NumPy Python package. Norms averaged over the genes were compared

between the protocols via two-sided t-test using the `scipy.stats.ttest_ind` function from SciPy Python package.

By this analysis, we detected markers of epithelial cell types in breast (e.g., *KRT15*, *KRT7*), esophagus mucosa (e.g., *SI00A9*, *SI00A8*, *KRT13*), lung (e.g., *SFTPC*, *SFTPB*, *SFTPA1*), prostate (e.g., *MSMB*, *KLK3*, *KLK2*), and skin (e.g., *KRT10*, *DST*, *COL7A1*) as major contributors to spurious estimates of gene expression and misidentification of cell types in those tissues. In muscle tissues, genes that were highly expressed in myonuclei were among the top contaminants (e.g., *MYL9*, *TAGLN*, *DES* in esophagus muscularis; *MYL2*, *TPM1*, *TNNC1* in heart, and *ACTA1*, *TPM2*, *TNNT1*, *TTN* in skeletal muscle).

## Comparison of snRNA-seq and scRNA-seq data

### Lung

The Travaglini et al. scRNA-seq dataset (Human Lung Cell Atlas (40)) was downloaded from <https://www.synapse.org/#!Synapse:syn21041850/wiki/600865> as a Seurat object as described in <https://github.com/krasnowlab/HLCA>. Blood samples were removed, retaining 72,976 cells from 3 patients. Original annotations given in the “free\_annotation” column were mapped to broad cell types used in our study according to the mapping in **table S4**. 60,095 scRNA-seq profiles were compared with 11,983 nuclei profiles from the TST protocol matching 15 shared broad cell categories: immune (alveolar macrophage), immune (macrophage), epithelial cell (ciliated), immune (NK cell), epithelial cell (alveolar type II), epithelial cell (alveolar type I), epithelial cell (basal), fibroblast, pericyte/SMC, immune (T cell), epithelial cell (club), immune (mast cell), immune (B cell), endothelial (vascular) and endothelial (lymphatic). Serous, goblet, mesothelial,

mucous, plasmacytoid dendritic and neuroendocrine cells, platelet/megakaryocytes and lipofibroblasts were found in scRNA-seq but not snRNA-seq.

## **Skin**

**Collection and experimental processing.** Samples for scRNA-seq were obtained from the abdomen, from discarded excess tissue removed during abdominoplasty (n=2, IRB 2017P001913/PHS). (Samples for snRNA-seq in this study were from the left or right leg, 2cm below the patella on the medial side as described above).

For processing fresh skin, hair and fat were removed and tissue was cut into small pieces, followed by two washes with 30 mL cold PBS in a 50 mL tube. Skin was then dissociated for single cell suspension using either the Miltenyi Biotec Whole Skin Dissociation Kit, human (cat no. 130-101-540) according to manufacturer's guidelines, or with dissociation medium containing 5 mL (2%) FBS in RPMI, 100 µg / mL Liberase TM (Sigma Aldrich, cat. no. 5401127001), 100 µg / mL Dispase (Sigma Aldrich, cat. no. 4942078001), 100 µg / mL DNase I (Sigma Aldrich, cat. no. 11284932001). For this protocol, samples were incubated in a rotating 50 mL tube, at 37°C for 3 hours, with pipetting every hour. After incubation, large undigested pieces were removed, and suspension was placed in a new tube, spun down for 3 minutes at 400g, followed by a wash with cold PBS. RBC lysis was performed using 500 µL ACK (Thermo Fisher Scientific, cat. no. A1049201) on ice for 1 minute, followed by a wash with 8 mL cold PBS. Samples were then pelleted and treated with 200 µL TrypLE (Life Technologies, cat. no. 12604013) for two minutes while pipetting and washed with 1 mL 10% FBS in RPMI to quench, followed by a wash with 1 mL of cold PBS. Pellet was then resuspended in 1 mL of 0.4% BSA (Ambion, cat. no. AM2616) in PBS, and filtered through a 70 µm strainer (Falcon, cat. no. 352350). Cells were counted by

mixing 5  $\mu$ l of Trypan blue (Thermo Fisher Scientific, cat. no. T10282) with 5  $\mu$ l of the sample and loaded on INCYTO C-Chip Disposable Hemocytometer, Neubauer Improved (VWR, cat. no. 82030-468). Cells were loaded onto a 10x Genomics Single-Cell Chromium Controller, using V2 3' GEX kit.

**Computational analysis.** Sequencing files were demultiplexed and quantified using Cellranger 2.0.1. and the human reference genome package version GRCh38-1.2.0 ([https://support.10xgenomics.com/single-cell-gene-expression/software/release-notes/build#grch38\\_1.2.0](https://support.10xgenomics.com/single-cell-gene-expression/software/release-notes/build#grch38_1.2.0)), using commands “cellranger mkfastq” and “cellranger count”, respectively. We then ran CellBender as described above to remove ambient RNA and retained high quality cells (at least 200 genes detected and at most 20% of reads mapping to mitochondrial genes per cell) for a total of 27,199 cells. We performed standard processing using the Seurat R package (v3) including total sum normalization and log transformation with a multiplicative factor of  $10^5$  (“NormalizeData”) resulting in  $\log(\text{TP10K}+1)$  units, determination of variable genes (“FindVariableFeatures” using the vst method), scaling (“ScaleData”), dimensionality reduction by principal component analysis (“RunPCA”,  $k=50$ ) and graph-based clustering (“FindNeighbors” for  $k=50$  and “FindClusters” at a resolution of 1). Using differential gene expression (“FindAllMarkers”) and annotation by curated marker genes, we annotated 15 cell classes. Of these, 11 were shared with this study’s skin snRNA-seq broad cell types: endothelial cell (lymphatic), endothelial cell (vascular), epithelial cell (basal keratinocyte), epithelial cell (suprabasal keratinocyte), melanocyte, immune (Langerhans), sweat gland cell, fibroblast, pericyte/SMC, immune (T cell) and immune (DC/macrophage). Adipocytes, cornified keratinocytes and sebaceous gland cells were unique to the snRNA-seq data, and preadipocytes were found only in the scRNA-seq data.

## **Prostate**

Published scRNA-seq data (Henry et al. (38)) from three anatomical zones from coronal sections of the whole prostate separated post-cystoprostatectomy was downloaded from GEO GSE117403 (D17, D27, Pd). (SnRNA-seq in our study was derived from any representative, non-nodular region, avoiding seminal vesicles). All samples were combined and processed as described above for skin scRNA-seq, resulting in a total of 82,822 cells annotated to 11 shared cell classes: epithelial cell (basal), epithelial cell (luminal), epithelial cell (club), epithelial cell (Hillock), endothelial cell (lymphatic), endothelial cell (vascular), pericyte/SMC, neuroendocrine, immune (DC/macrophage), fibroblast, myocyte (smooth muscle). Additional epithelial subsets identified only in the scRNA-seq data were *FOXI1*<sup>+</sup>, *SEMGI*<sup>+</sup>, stressed and cycling cells, and only the snRNA-seq data had lymphocytes, mast and Schwann cells. The discrepancy in the immune cells may be because the scRNA-seq data was enriched for epithelial and mesenchymal cells. TST, CST+TST, and TST protocols are used in single-nucleus single-cell correlations in lung, skin, and prostate, respectively.

## **Mapping scRNA-seq and snRNA-seq profiles with a random forest classifier**

To compare profiles between scRNA-seq and snRNA-seq datasets, a multi-class random forest classifier was trained on nuclei (cells) profiles as the training set with the function “*randomForest*” from the *randomForest* R package, and used to predict the classes of cells (nuclei) profiles with the “predict” function, with the shared broad cell classes (15 in lung, 11 in skin, and 11 in prostate) as class labels (cells/nuclei unique to only scRNA-Seq/snRNA-Seq were removed prior to analysis). The smaller of up to 70% of the cell class size or 1,000 cells were randomly sampled per class to form a training set, and genes were selected as the intersection of the top 3,000 highly

variable genes from both nuclei and cell profiles. Highly variable genes were derived using the *FindVariableFeatures* function with “vst” as the selection method. Broad cell types were accurately predicted in scRNA-seq by a classifier trained on snRNA-seq with a median accuracy of 89%, 89%, 89.3% across skin, lung, and prostate, respectively (**Fig. 2C-E, fig. S11F-H**). There was a similarly high accuracy for predicting snRNA-seq broad cell types by a classifier trained on scRNA-Seq (median 88% in skin, 90% in lung), suggesting that cell intrinsic programs are well-preserved between fresh and frozen samples and techniques. Similarly, to assess the differences in using broad vs granular labels, RF classifiers were also trained on the snRNA-seq datasets using granular labels as described above and predicted on the scRNA-seq datasets. TST, CST+TST, and TST protocols are used in these classifications in lung, skin, and prostate, respectively.

### **Integration of skin, prostate and lung scRNA-seq dataset with our atlas**

scRNA-seq and snRNA-seq profiles were concatenated using Scanpy (183).  $\log(\text{TP10K}+1)$ -transformed counts were used to estimate 1,000 highly variable genes using the `sc.pp.highly_variable_genes()` function of Scanpy. The `batch_key='orig.ident'` (for prostate and lung) or the `flavor='seurat_v3'` (for skin) option was used in the `sc.pp.highly_variable_genes()` function. PCA was fitted using the HVGs and samples were integrated using the PyTorch implementation of Harmony (<https://github.com/lilab-bcb/harmony-pytorch>) in the PC space using samples as a batch variable. A  $k$ -nearest neighbors ( $k$ -NN,  $k=15$ ) graph was constructed using the Harmony-corrected PCs. scRNA-seq-only embeddings were generated with the same procedure as the embeddings of integrated samples.

## **Correlation analysis between scRNA-seq and snRNA-seq profiles**

Pseudobulk expression profiles were correlated between cells and nuclei. For each broad cell type category separately, pseudobulk profiles were computed as follows: The gene (rows) by cell (column) matrix of raw counts for each sample was first scaled per-column by the total counts in each cell (nucleus) and then multiplied by  $10^6$  to derive counts per million (CPM) for each cell (nucleus) profile. CPMs for each gene were then averaged across cells (row-wise) for each broad cell type. The resulting expression vector per sample is the pseudobulk profile. Spearman correlation was computed for the  $\log_2$ -transformed pseudobulk gene expression profiles of the cell and nucleus data of interest separately for protein-coding and long non-coding RNA genes selected as follows. The total set of human genes was downloaded from the Ensembl database (GRCh38 v103, 04/09/2021), using the BiomaRt R package. Mappability scores for GRCh38, computed using the ENCODE pipeline (190), were obtained from GTEx and averaged across gene bodies. The complete set was then partitioned into genes with both pre-mRNA and mRNA mappability > 90%, and then partitioned into protein coding and long non-coding RNA genes based on their Ensembl biotype classification.

To identify genes that deviate from the overall expected similarity, a linear model was fit to compute residuals using the command “`resid(lm(cells-nuclei ~ 0))`”, where the “cells” and “nuclei” are  $\log_2$ -transformed pseudobulk gene expression profiles of the scRNA-seq and snRNA-seq data, respectively for either protein-coding or long non-coding RNA genes. Divergent genes were defined as those with residuals greater than the 97.5th or lesser than the 2.5th percentile, respectively.

Poly-A content was computed using the *BSgenome.Hsapiens.UCSC.hg38* R package by searching for stretches of at least 20 consecutive adenine “A” bases to qualify as one “polyA” unit. The total polyA width for a gene was defined as the total number of As in such units. The gene length was also computed using the same package.

### **Comparison of tissue dissociation induced-stress signature scores**

Single-cell dissociation protocols have been reported to cause dissociation-induced gene expression (41, 42). We scored a published dissociation signature (41) in snRNA-seq and scRNA-seq profiles using the “AddModuleScore” function in Seurat for each shared cell classes across snRNA-seq and scRNA-seq datasets. The score was computed on the normalized gene expression units of  $\log(\text{TP10K}+1)$ .

### **Proportion analysis**

Dirichlet regression was used for proportion analysis via *DirichletReg* R package version 0.7.0. For analysis of broad cell type proportions, “proportions ~ protocol + tissue + Age + Sex” formula was used with common parameterization, where lung and CST were used as references for protocol and tissue categorical variables.

We applied this to compare proportions of (1) broad cell types, (2) myeloid states, (3) comparison between scRNA-seq and snRNA-seq, and (4) comparison of heart snRNA-seq studies. For myeloid proportions, the formula “proportions ~ tissue + protocol | protocol” was used with alternative parameterization to correct both mean and precision estimates for the protocol effects. We fitted eight models, each with a different tissue used as a reference. For comparing proportions between protocols, the formula “counts ~ protocol | protocol” was used with the alternative



parameterization. For comparison of scRNA-seq vs. snRNA-seq, scRNA-seq was used as the reference. For comparison between snRNA-seq datasets in heart, this study's data was used as the reference. Samples with fewer than 30 nuclei profiles were excluded from the proportion models. In the comparison of proportions among heart snRNA-seq studies, data from this study's EZ protocol, Litviňuková et al. (34) and Tucker et al. (33) showed a higher proportion of muscle cells in comparison to the CST, NST and TST protocols (Dirichlet regression, LRT with CST as baseline: Benjamini-Hochberg FDR= $2.5 \times 10^{-4}$  (EZ), 0.002 (Tucker et al.) ,  $6.3 \times 10^{-4}$  (Litviňuková et al.)), and lower proportions of endothelial cells (adj.  $P=0.002$  (Tucker et al.),  $4 \times 10^{-10}$ , (Litviňuková et al.)). The immune and adipose compartments were comparable in proportions (Benjamini-Hochberg FDR $>0.1$ ) across protocols and studies, however, Litviňuková et al. (34) had lower proportions of fibroblasts (Benjamini-Hochberg FDR= 0.1). Taken together, all four protocols retain expected cell groups shared with published protocols.

### Normalization of proportions

To account for the variation in total number of nuclei profiled in each tissue (*e.g.*, 5,327 in skin and 36,574 in heart) in **Figs. S2D** and **S25F**, where the proportions of nuclei from each tissue for each cell type are visualized, we normalized each proportion by the total number of nuclei profiled in that tissue. To visualize the proportion of nuclei from tissue  $q$  for the cell type  $p$ , instead of  $N_{p,q} / \sum_i N_{p,i}$  where  $N_{x,y}$  represents number of nuclei for cell type  $x$  in tissue  $y$ , we used  $(N_{p,q} / \sum_i N_{i,q}) / (\sum_j (N_{p,j} / \sum_i N_{i,j}))$  formula. Therefore, these visualizations approximately show what the proportions would be, if the same number of nuclei were recovered in each tissue.

### **Co-embedding of bulk and snRNA-seq pseudobulk profiles**

GTEX v8 bulk RNA-seq expression data were downloaded from the GTEX portal <https://gtexportal.org>, converted into an AnnData object and concatenated with the pseudobulk profiles of the nuclei profiled in this study. Channels with fewer than 30 nuclei were not used. The number of highly variable genes (calculated only on the pseudobulk data), the number of PCs, the number of neighbors,  $k$ , used in the  $k$ -NN graph and the similarity metric used in the  $k$ -NN graph were determined by the Tree of Parzen Estimators (TPE) random hyperparameter search method implemented in hyperopt Python package (v0.2.5) (191). The accuracy metric that was optimized in the search was defined as the fraction of bulk neighbors of pseudobulk data points that are from the same tissue site. Final parameters used were 3,522 HVGs, 70 PCs, 42 nearest neighbors and  $L1$  as the  $k$ -NN distance metric. Bulk and pseudobulk samples were integrated using the PyTorch implementation of harmony (v0.1.5, <https://github.com/lilab-bcb/harmony-pytorch>) (184) in each iteration.

### **Sample embeddings based on cell type compositions**

Broad cell type proportions in each profiled sample were used to construct an  $k$ -mutual nearest neighbors graph of channels in Scanpy. We used  $k=7$  and Fruchterman-Reingold layout where connected components of the graph were considered clusters.

### **Preprocessing and visualization of myeloid nuclei profiles**

We used  $\log(TP10K+1)$ -transformed counts to estimate 2,000 highly variable genes. PCA was fitted using the HVGs and a  $k$ -nearest neighbors ( $k$ -NN,  $k=15$ ) graph was constructed using 50 PCs. We integrated all myeloid nuclei profiles from eight tissues using the PyTorch implementation of Harmony (184) (<https://github.com/lilab-bcb/harmony-pytorch>) to correct for

individual- and protocol-specific variation in the PC space. A PAGA (192) graph was inferred based on the myeloid annotations and UMAP visualization was performed with PAGA initialization. Proportion bar plots and dotplots were generated using the Python implementation of the ggplot framework, plotnine version 0.7.

### **Diffusion map representation of monocyte and macrophage populations**

Myeloid nuclei profiles were subset to MΦ *HLAII<sup>high</sup>*, MΦ *LYVEI<sup>high</sup>*, Mo/MΦ *FCGR3A<sup>high</sup>*, Mo/MΦ *FCGR3A<sup>low</sup>*, *CD14<sup>+</sup>* monocyte and *CD16<sup>+</sup>* monocyte states. Next, log(TP10K+1)-transformed counts were used to estimate 1,000 highly variable genes. PCA was fitted using the HVGs and a *k*-nearest neighbors (*k*-NN, *k*=15) graph was built using 50 PCs. We integrated all the nuclei profiles from eight tissues using the PyTorch implementation of Harmony (184) (<https://github.com/lilab-bcb/harmony-pytorch>) to correct for individual- and protocol-specific variation in the PC space, using protocols and individuals as batch variables. Finally, `sc.tl.diffmap()` function from Scanpy (183) was used for the diffusion map inference.

### **Classification of lipid-associated macrophages**

We used a published annotated adipose scRNA-seq study (51) to train a logistic classifier that can classify profiles into three groups: LAMs, non-LAM macrophages and other cell types. We performed 5-fold stratified cross-validation that maximizes weighted F1-score, using the `LogisticRegressionCV` function from the scikit-learn Python package to optimize the *L2*-regularization parameter. To take highly imbalanced class frequencies, we employed a weighting scheme, where rarer classes (*e.g.*, LAMs) contributed more to the overall loss function. log(TP10K+1)-transformed expression values of 17,612 protein coding genes were used in the training.

### **Preprocessing of the external datasets used in LAM classification**

Datasets with IDs GSE115469, GSE117403, GSE127246, GSE128518, GSE153643, GSE131685, GSE131778, GSE131886, GSE140393, GSE143380, GSE143704, GSE144085, GSE150672, GSE153760, GSE156776, GSE159677 were downloaded from Gene Expression Omnibus (GEO). Placenta and decidua datasets were downloaded from EBI Single Cell Expression Atlas (<https://www.ebi.ac.uk/gxa/sc/home>) using the E-MTAB-6701 accession via the “sc.datasets.ebi\_expression\_atlas” function of the Scanpy Python package. Human dataset of the enteric nervous system was downloaded from the Single Cell Portal (URL: [https://singlecell.broadinstitute.org/single\\_cell/study/SCP1038](https://singlecell.broadinstitute.org/single_cell/study/SCP1038)).  $\log(\text{TP10K}+1)$ -transformed counts were used for classification.

### **Gene set enrichment of LAM-like cell markers**

LAM-like profiles were compared to other myeloid profiles by ranking genes by their mean z-scored  $\log(\text{TP10K}+1)$  expression values. Top 80 genes were then evaluated for GO term enrichment using the “sc.queries.enrich” function of Scanpy (183) after excluding genes from the ferritin (*FTL*, *FTH1*) and metallothionein (*e.g.*, *MT1A*, *MT2A*) families. GO terms with more than 1,000 genes were not shown to highlight more specific terms.

### **Consensus LAM markers**

LAMs were compared to other macrophages within each of the external datasets using `sc.tl.rank_genes_groups()` function of Scanpy. Genes with  $\log_2$  fold-change  $> 0.5$  and FDR  $< 0.1$  were retained as significant markers within each dataset. Next, genes were ranked by the number of datasets where a gene was among the top 100 significant markers and the top 30 genes were

retained as consensus markers. GWAS where the genome-wide significant variants are mapped to the consensus LAM markers with Open Targets Genetics Locus-to-Gene score greater than 0.5 were shown in **fig. S17H**. Open Targets Locus-to-Gene scores of all GWAS variants were downloaded as described in the *Variant-to-gene mapping using the Open Targets Genetics API* section.

### **TF activity analysis of LAMs**

The Python implementation of Dorothea (193, 194) (<https://github.com/saezlab/dorothea-py>, version 1.0.5) was used to calculate the activity scores of 292 transcription factors, in the A, B and C confidence categories of Dorothea, for each cell. `dorothea.run()` function was run with “adata, regulons, center=True, num\_perm=0, norm=True, scale=True, use\_raw=False, min\_size=5) arguments. After extracting TF scores using the `dorothea.extract()` function, LAMs and MΦ groups were compared using Welch’s t-test implemented in the `sc.tl.rank_genes_groups()` function of Scanpy. P-values (**fig. S17G**) were calculated by combining the p-values shown for individual studies using Fisher’s method implemented in the `scipy.stats.combine_pvalues()` function of SciPy Python package.

### **Differential expression of MΦ *LYVE1*<sup>hi</sup> vs. MΦ *HLAII*<sup>hi</sup> states**

To compare MΦ *LYVE1*<sup>hi</sup> vs MΦ *HLAII*<sup>hi</sup> states in heart and lung, a Wald test with a negative binomial regression model was used with the formula “~ 1 + cell\_state + participant\_id + protocol + log\_number\_of\_genes” on raw counts. In esophagus mucosa, participant\_id and protocol covariates were not used since most MΦ *HLAII*<sup>hi</sup> nuclei were detected in the GTEX-15SB6 CST sample. Benjamini-Hochberg FDR<0.05, log<sub>2</sub>(fold-change)>1.0, fraction of nuclei expressing a

gene (alpha)>5% cutoffs were used for significance. Top 100 markers given in **Table S4** and **S5** from Chakarov *et al.* (47) were used for the comparison of mouse and human macrophage markers.

### **Tissue-shared and tissue-enriched signatures of fibroblasts**

Log(TP10K+1)-transformed counts of fibroblast nuclei profiles across eight tissues were used to estimate 2,000 highly variable genes. PCA was fitted using the HVGs and a  $k$ -nearest neighbors ( $k$ -NN,  $k=15$ ) graph was built using 50 PCs. We integrated all the nuclei profiles from eight tissues using the PyTorch implementation of Harmony (184) (<https://github.com/lilab-bcb/harmony-pytorch>) to correct for individual-specific variation in the PC space using individuals as batch variables. UMAP representations were generated using the `sc.tl.umap()` function from Scanpy (183). Pseudobulk approach was used for the differential expression between the tissues where each channel with more than 30 nuclei profiles was collapsed into a single observation by taking the mean expression across all nuclei within each channel. Welch's t-test was used for comparing tissues to each other in a one-vs-rest manner via the `sc.tl.rank_genes_groups()` function in Scanpy (183). A common fibroblast signature was obtained by identifying significantly differentially expressed genes ( $\log_2FC > 1$ ,  $FDR < 0.1$ ) in fibroblasts within each tissue (as described in the *Data-driven identification of marker genes using differential expression* section). After selecting genes that are identified in at least seven tissues, 15 genes with highest mean z-score-normalized expression across tissues were picked.

The lung-enriched marker genes shown in **Fig. 4B** were used as a seed to find a larger set (module) of co-varying genes to highlight potential tissue-specific functions of lung fibroblasts. Using the same approach described in the section *Module-based GWAS enrichment*, gene modules were constructed by hierarchically clustering genes expressed by fibroblasts across eight tissues with

different hierarchy levels used as cutoffs to obtain modules of varying scopes. Instead of testing for the enrichment in GWAS genes as in **Fig. 7**, the inferred gene modules were tested for enrichment in lung-enriched fibroblast marker genes (*i.e.*, *NPNT*, *LIMCH1*, *ITGA8*, *FRAS1*, *HMCN1*, *PIEZO2*, *ADAMTS12*, *GPC3*, *FGFR4*). The most significantly enriched (FDR=  $8.98 \times 10^{-11}$ ,  $\log_2FC$ : 8.45) gene module with fewer than 100 genes (n=68) was used in the gene set analysis (see **table S8** for the full list of genes). `sc.queries.enrich()` function in Scanpy was used for the gene set enrichment analysis only with the GO:BP, GO:CC and KEGG gene set sources.

GWAS where *NPNT* is associated with a genome-wide significant variant with Open Targets Locus-to-Gene score higher than 0.5 were shown in **Fig. 4H**. Open Targets Locus-to-Gene scores of all GWAS variants were downloaded as described in the section *Variant-to-gene mapping using the Open Targets Genetics API*.

### **Topic modeling of OMIM diseases**

Metadata for 5,812 monogenic diseases including OMIM numbers and text descriptions were downloaded from OMIM (116) through the API (<https://www.omim.org/api>). Symbols of the disease-associated genes were downloaded from <https://www.omim.org/static/omim/data/mim2gene.txt>. Only the phenotype entries with a prefix of number sign (#) were retained and the rest were discarded. Text descriptions were preprocessed and tokenized, where words were converted to lowercase and split by whitespace after '?', '!', ',', ':', ';', '"', ""', '(', ') characters were removed, yielding 42,654 tokens. Stochastic block modeling-based hierarchical topic modeling (195), ([https://github.com/martingerlach/hSBM\\_Topicmodel](https://github.com/martingerlach/hSBM_Topicmodel)) was run on the preprocessed text descriptions of the diseases with `n_min=2` and `B_min=200` parameters in `make_graph()` and `fit()` functions, respectively. Topic models with four hierarchical

levels were obtained after the inference with differing number topics in each layer (n=10, n=53, n=229, n=941 in four layers), where the output consisted of two matrices: **(1)** a disease (which typically has a single gene association but in some cases more than one) by topic ( $P(\text{topic} | \text{disease})$ ) and **(2)** a topic by word ( $P(\text{word} | \text{topic})$ ) matrix in each layer. The former was used in gene set enrichment analysis (below) and the latter is used for the interpretation of topics.

For gene set enrichment analysis (**Fig. 5A**), the third layer with 229 topics was used to obtain granular topics. Level four of the hierarchy consisted of several singleton topics (with a single disease or word with probability of 1.0) and therefore not preferred. First, diseases with high loadings within each topic were identified based on a cutoff of the 99<sup>th</sup> percentile of the distribution of probabilities ( $P(\text{topic} | \text{disease})$ ) across diseases within each topic. If a disease with a probability higher or equal to the cutoff was associated with multiple genes, all genes associated with it were included in the gene sets. The size distribution of gene sets (n=229) had minimum, median and maximum of 58, 64 and 164 genes, respectively. Second, Fisher's exact test (fisher Python package, version 0.1.9) was used to test whether genes associated with diseases with high loadings in each topic were enriched in broad cell type markers (as described in the *Data-driven identification of marker genes using differential expression* section). Integer identifiers of topics (topic numbers) with a comma-separated list of five words with highest probabilities in each topic were used as topic labels in the figures (*e.g.*, 155:ciliary,arms,cilia,outer,bladder). Diseases and genes shown in **fig. S22** were selected based on z-score normalized  $\log(\text{TP10K}+1)$  expression values, where the cell types with a mean normalized z-score greater than 1.0 are shown.



## Receptor-ligand analysis

CellPhoneDB version v2.1.4 (144) was used for receptor-ligand analysis of granular cell types within each tissue. “cellphonedb method statistical\_analysis” command was used for the analysis of each tissues with the arguments “meta.tsv counts.tsv --counts-data hgnc\_symbol --project-name tissue --threads 30 --subsampling --subsampling-num-cells 50000 --subsampling-log false”. Receptor-ligand plots (**Fig. 5**) were created with the ggraph R package using the “sugiyama” graph layout. Granular cell type names were converted to broad cell type labels in **Fig. 5** for clarity.

For the cell-cell interactions of dichotomous macrophage populations and other cell types in **fig. S16F-G**, receptor-ligand pairs included in CellPhoneDB v2.1.4 (144) were used as a source of potential interactions. First, scaled mean expression (z-score,  $\log(\text{TP10K}+1)$ ) of receptor and ligands within all myeloids were calculated for each granular myeloid subset. Second, scaled mean expression (z-score,  $\log(\text{TP10K}+1)$ ) of receptor and ligands within the entire dataset was calculated for each broad cell type. After ranking the receptor-ligand pairs based on the mean of *LYVE1*<sup>hi</sup> (**fig. S16F**) or *HLAI*<sup>hi</sup> (**fig. 16G**) and broad cell types, six and five pairs were highlighted in **fig. S16** for *LYVE1*<sup>hi</sup> and *HLAI*<sup>hi</sup> populations, respectively.

For the cell-cell interactions of fibroblasts and neurons in **fig. S18E**, the same receptor-ligand pairs were used. Scaled mean expression (z-score,  $\log(\text{TP10K}+1)$ ) of all granular fibroblast subsets across 8 tissues and scaled mean expression (z-score,  $\log(\text{TP10K}+1)$ ) of all broad cell types across 8 tissues were calculated. Finally, pairs were ranked by the mean expression of esophagus mucosa fibroblasts and esophagus muscularis neurons. Three pairs were highlighted in the figure.

## Gene set enrichment of monogenic muscle disease genes

Monogenic muscle disease names, groups, subgroups and associated genes were downloaded from <https://musclegenetable.fr> (118). The resource included 928 diseases with associations to 605 unique genes. Disease genes shown in **fig. S24** are 64 genes associated with monogenic diseases in “Muscular dystrophies” and “Congenital muscular dystrophies” disease groups.

Next, the enrichment of data-driven broad and granular cell type markers ( $\log_2$  fold-change  $> 1.0$ ,  $FDR < 5\%$ , see *Data-driven identification of marker genes using differential expression* section) in muscle disease groups and subgroups was tested using Fisher’s exact test implemented by the “fisher” Python package.

## Differential expression analysis of myonuclei subsets and myocyte subtypes

Gene expression profiles of regular and cytoplasmic myonuclei were compared using Welch’s t-test via the `sc.tl.rank_genes_groups()` function of Scanpy. Similarly, myonuclei profiles of fast and slow myocytes were compared within regular and cytoplasmic subsets using Welch’s t-test and the `sc.tl.rank_genes_groups()` function of Scanpy. In the slow vs. fast myocyte differential expression volcano plots (**fig. S9**), genes within  $[-10, 10] \log_2(\text{fold-change})$  are shown, since the genes beyond this range were expressed only in a small fraction of cells (low alpha). Hereditary cardiomyopathy disease group was not used in the slow vs. fast myocyte differential expression analysis. Significantly differentially expressed genes ( $|\log_2(\text{fold-change})| > 0.5$  and  $FDR < 5\%$ ) were tested for enrichment in muscle disease groups using Fisher’s exact test implemented in fisher Python package.

## **Differential expression analysis of bulk RNA-seq profiles of muscle samples**

RPKM-normalized bulk RNA-seq gene expression matrix of muscle disease patient samples was received from the authors (122). Patient metadata, including the clinical diagnoses, were obtained from **Table S1** in Cummings et al. (122). RPKM-normalized GTEx v6 expression profiles, which were also used in the Cummings et al. as control samples, were downloaded from the GTEx Portal (GTEx\_Analysis\_v6\_RNA-seq\_RNA-SeQCv1.1.8\_gene\_rpkm.gct.gz). Healthy controls given in **Table S4** in Cummings et al. were subsampled to 20. After concatenating the datasets, RPKM values were converted to  $\log(\text{TPM}+1)$  using `sc.pp.normalize_total(adata, target_sum=1e6)` and `sc.pp.log1p(adata)` functions of Scanpy and z-score normalized for visualization and differential expression. Welch's t-test implemented by `sc.tl.rank_genes_groups()` function of Scanpy was used for the differential expression where the sample profiles from the patients in each clinical diagnosis group were compared with the healthy GTEx v6 muscle samples.

## **Linking snRNA-seq to genetic variation using GWAS/eQTL enrichment analysis**

To test whether the expression of genes in GWAS loci associated with a given complex disease or trait is enriched in specific cell types more than expected by chance, ECLIPSER (152) was applied to compare the cell type specific expression of genes mapped to known GWAS loci for a complex trait of interest to a background distribution of GWAS loci. GWAS variant associations were obtained from Open Targets Genetics (153, 154) from the NHGRI-EBI GWAS catalog and UK Biobank GWAS. Only GWAS with at least part of their samples from European ancestry and genome-wide significant associations ( $P < 5 \times 10^{-8}$ ) were considered. 23 traits were selected (**table S14**) based on pathophysiology related to one of the 8 tissues in this study. Different GWAS that mapped to the same trait were considered together for the given trait (**table S14**). For each tissue, a background of GWAS loci (null set) was defined as the GWAS variants for all traits excluding

the set of traits selected for the particular tissue (on average 71,411 variants). The enrichment analysis consisted of three consecutive steps, as follows:

**Gene mapping.** Genes were mapped to trait-associated loci for the selected and background (null) traits, using the 95% credible set of fine-mapped *cis*-eQTLs and *cis*-sQTLs from each of the 49 GTEx tissues (v8) computed using DAP-G (7, 151, 196) and the European subset of GTEx samples (7, 151, 196). Specifically, all variants in LD ( $r^2 \geq 0.8$ ) with each of the GWAS variants were identified using the GTEx whole genome sequencing variant calls as the reference panel (7) and PLINK 2.0 (Plink --bfile 1KG\_chr\_files --r2 --ld-snp-list variant\_list\_file --ld-window-kb 5000 -ld-window-r2 0.8 --ld-window 99999). If a GWAS variant was not present in the GTEx samples, LD proxies for the variant were searched in the 1000 Genomes Project panel (197) at  $r^2 > 0.8$ , and these proxies were subsequently checked for LD variants in the GTEx panel. GWAS associations whose variant or LD proxy variants were significant eVariants or sVariants ( $FDR < 0.05$ ) in any of the 49 GTEx tissues were assigned the corresponding eGene/s and sGene/s to their locus. We further included genes mapped to GWAS variants based on the 'bestLocus2Genes' mapping from Open Targets Genetics, which included additional omic data (e.g., Hi-C) and predicted deleterious protein coding variants in LD with the GWAS variant (153, 154). To avoid inflation of enrichment due to LD between GWAS variants, GWAS variants that shared LD proxy variants, or eGenes or sGenes were collapsed into a single locus. This was done separately for the GWAS variants for each selected trait and for all null traits per tissue. On average, 40% of the null variant sets and 80% of the 23 selected traits had at least one mapped gene, and of the mapped loci, on average 2 genes mapped per locus, ranging from 1-37 for the selected traits and 1-170 for the null traits.

**Locus scoring.** For each combination of trait of interest, tissue, and cell type, each GWAS locus was first scored based on the fraction of  $\log_2$  fold-change  $> 0.5$  and FDR  $< 0.1$  of all genes mapped to the locus.

**Cell type specificity significance estimate.** The significance of the cell type specificity scores of a GWAS locus set for each cell type was assessed against the distribution of values of the background GWAS loci using a Bayesian Fisher's exact test. Specifically, the counts of GWAS loci with their scores greater than the 95<sup>th</sup> percentile of scores from the background loci for a given cell type were modeled as Binomial distributions, with the parameters  $(\theta_1, n_1)$  and  $(\theta_2, n_2)$  for the GWAS locus set and background loci, respectively, where  $n_1$  and  $n_2$  are the total number of loci in the GWAS locus set and background, respectively. Uninformative uniform priors were specified for  $\theta_1$  and  $\theta_2$ , leading to the conjugate Beta distributed posteriors. Next, fold enrichment was defined as the ratio of  $\theta_1$  and  $\theta_2$ , and the 95% credible interval was constructed from  $10^6$  Monte Carlo draws from the posteriors. Of 23 selected traits, 21 had 5 or more GWAS loci with at least one mapped gene, which were analyzed for cell type specificity enrichment (**table S14**). Multiple hypothesis correction was applied tissue-wide (correcting for all cell types tested per tissue and trait) and experiment-wide (correcting for all traits by cell types and tissues tested) using the Benjamini-Hochberg FDR. In the significantly enriched cell types, cell type specific genes mapped to GWAS loci with cell type specificity scores above the 95th percentile of the background loci scores are suggested to be causal genes for the given trait in the enriched cell type.

Enrichment of heart-specific and tissue shared, myonuclei-specific genes that drove the enrichment signal of atrial fibrillation GWAS loci in heart myonuclei, was tested using GeneEnrich (150) based on the hypergeometric distribution, and Gene Ontology terms (**tables**

**S15-16).** Genes that were myonuclei-specific in heart and at least one of the other tissue/cell combinations (skeletal muscle/myonuclei (sk. muscle), esophagus muscularis/myonuclei (smooth muscle), or prostate/myonuclei (smooth muscle)) were considered tissue shared genes in the analysis.

Cell type specificity enrichment for Atrial fibrillation GWAS loci in GTEx heart tissue was tested for replication in two separate heart left ventricle snRNA-seq studies (33, 34). Data was processed as described above and differential gene expression was computed similarly to that performed for GTEx tissues, correcting for donor in Tucker *et al.* (33), and sequencing center, age and sex in Litviňuková *et al.* (34), using Combat (189). Only genes expressed in at least 5% of cells in each given cell type were considered in these studies for cell type specificity scoring.

### **Variant-to-gene mapping using the Open Targets Genetics API**

Publicly available JSON files (v20022712) and the GraphQL API (v20.02.07) of the Open Targets Genetics (OTG) portal were used to obtain genes mapped to the independent GWAS loci in **Figs. 6 and 7**. For study level information (*e.g.*, study IDs, number of individuals, number of significant loci), JSON files were downloaded from <https://ftp.ebi.ac.uk/pub/databases/opentargets/genetics/20022712/lut/study-index>. For variant-to-gene mapping and variant-level details, such as Locus-to-Gene scores, the `manhattan()` and `studyInfo()` functions were used through the GraphQL API endpoint <https://api.genetics.opentargets.org/graphql> using the `sgqlc` Python package. The `manhattan()` function provides the list of all significant and independent lead SNPs as well as the genes associated with them using the Locus-to-Gene scoring model for the studies stored in the OTG portal. Closest protein coding genes were used in cases where Locus-to-Gene score was not

available. GWAS with fewer than two significant loci or fewer than 3,000 individuals were excluded. UK BioBank (UKBB) traits containing “None of the above” were also removed. For the remaining studies, only the largest GWAS (based on the nInitial field of the study) was considered for a given phenotype, resulting in 4,062 studies.

### **Module-based GWAS enrichment**

To infer gene modules enriched with GWAS risk genes and the cell types expressing these modules, genes were first hierarchical clustered with the complete linkage method and a correlation distance, i.e.  $dist(g_1, g_2) = 1 - r(g_1, g_2)$  where  $r$  is the Pearson correlation coefficient between genes  $g_1$  and  $g_2$ , calculated with the `scipy.cluster.hierarchy.linkage` function from the `scipy` Python package. Models were fit separately in each tissue using all protein coding genes. To speed up the inference, clustering was performed in PC space, where gene loadings for 100 PCs were taken into account in the distance calculations. Gene modules were obtained at different resolutions by cutting the linkage tree at 100 different levels starting from only two clusters (*i.e.*, modules) to a highly granular level, where the number of clusters is equal to half of the number of genes. In a post-processing step, modules that were exactly the same or had fewer than three genes were removed. Next we scored all cells using each module as a signature to quantify average expression of the modules using the `scanpy.tl.score_genes()` function. Finally, gene module enrichment with the GWAS risk genes was estimated by testing all modules against all GWAS phenotypes using Fisher’s exact test implemented in “fisher” Python package. Final cell type enrichment score was defined as the product of the gene set overlap metric (f-score) and the signature score (module expression). To prioritize the associations with high expression and high gene set overlap we used additional cutoffs such as at least four genes in the intersection of the GWAS risk genes and the module genes and enrichment score higher than 0.15.

## **Preprocessing and demultiplexing of pooled samples**

For genotype-based demultiplexing and doublet detection, souporecell (168) was used as available in a Docker image from Cumulus (198) (Cumulus version 2020.03, souporecell version eeddcde). Vartrix v1.1.20 (<https://github.com/10XGenomics/vartrix>) was used instead of the older version included in the Docker image. Souporecell was applied to four samples with the following command line arguments “-t 32 -o outputdir --min\_alt 10 --min\_ref 10 --restarts 100 --common\_variants common\_variants\_grch38.vcf -k 3”. Using the unpooled lung and prostate samples from the same individuals, an expression-based multinomial logistic classifier was trained to predict the individuals. The “LogisticRegression(max\_iter=500, penalty='l2', solver='liblinear', C=0.001, class\_weight='balanced')” function from the scikit-learn Python package (v0.24.1) was used for the training. 0.6 probability cutoff was used to assign each nucleus to individuals. scrublet Python package for doublet detection was used to compare to the souporecell doublet detection method.



## Supplementary Text

### Note S1: Best practices in data integration methods

Our observations in the cross-tissue setting suggest that VAEs strike a balance between the need to successfully correct for batch effects, while preserving biological variation. Many other methods tend to overcorrect (*e.g.*, smoothen) the biological signal. For example, Harmony removes complex batch effects (*e.g.*, across many samples), but sometimes at the loss of biological information (187). Conversely, MNN and BBKNN are better at conserving biological signals, but less efficient at removing complex effects, such as the individual-specific effects present in our dataset. We recommend using both VAE-based integration methods and Harmony for complex integration tasks, followed by a thorough investigation of overcorrection for the final choice of the integration method. For a comprehensive comparison of methods and best practices, we also refer the reader to Lucken et al. (187).

### Note S2: Cytoplasmic myonuclei

Cytoplasmic myonuclei were first described in Tucker et al. (33) and have high myoglobin (MB) expression and a high ratio of exon- vs. intron-mapping reads (28, 33). While “cytoplasmic myonuclei” were initially speculated to be possible contaminants (33), we detected their profiles in three independent studies using six different snRNA-seq protocols (33, 34), including after ambient RNA removal in our study (**fig. S1**). To further determine their distinguishing characteristics, we compared their expression profile to those of classical myonuclei, identifying significantly differentially expressed genes in each subset (33), with those from the cytoplasmic myonuclei showing high overlap with the markers from Tucker et al. (**fig. S8**). We further observed classical and cytoplasmic myonuclei in skeletal muscle and in mouse skeletal muscle. Overall, this supports the “cytoplasmic myonuclei” as a distinct subset that merits further dedicated investigation in future dedicated studies.

### Note S3: Comparison of extraction solutions

In our comparisons, TST yielded the highest cell type diversity on average across tissues (**Fig. 2A**) and significantly higher proportions of T cells, fibroblasts, and vascular endothelial cells (FDR<10%, **fig. S11A**). EZ yielded significantly lower proportions for most cell types (**fig. S11A**). NST yielded significantly higher proportions of sweat gland cells and cardiac myonuclei (FDR<10%, **fig. S11A**). Overall, the EZ protocol performed least well for all metrics and across all tissues, while the other protocols performed comparably overall, but differently depending on the specific metric. Since protocols vary by their performance based on the desired goal (most diverse, high capture of

particular desired cell types), users should choose protocols by their detailed features based on their scientific goal, tissue type and complexity, and further protocol optimization may still be required. For additional comparisons and help with such choices, including in disease tissue, we also refer the interested reader to Slyper et al. (29).

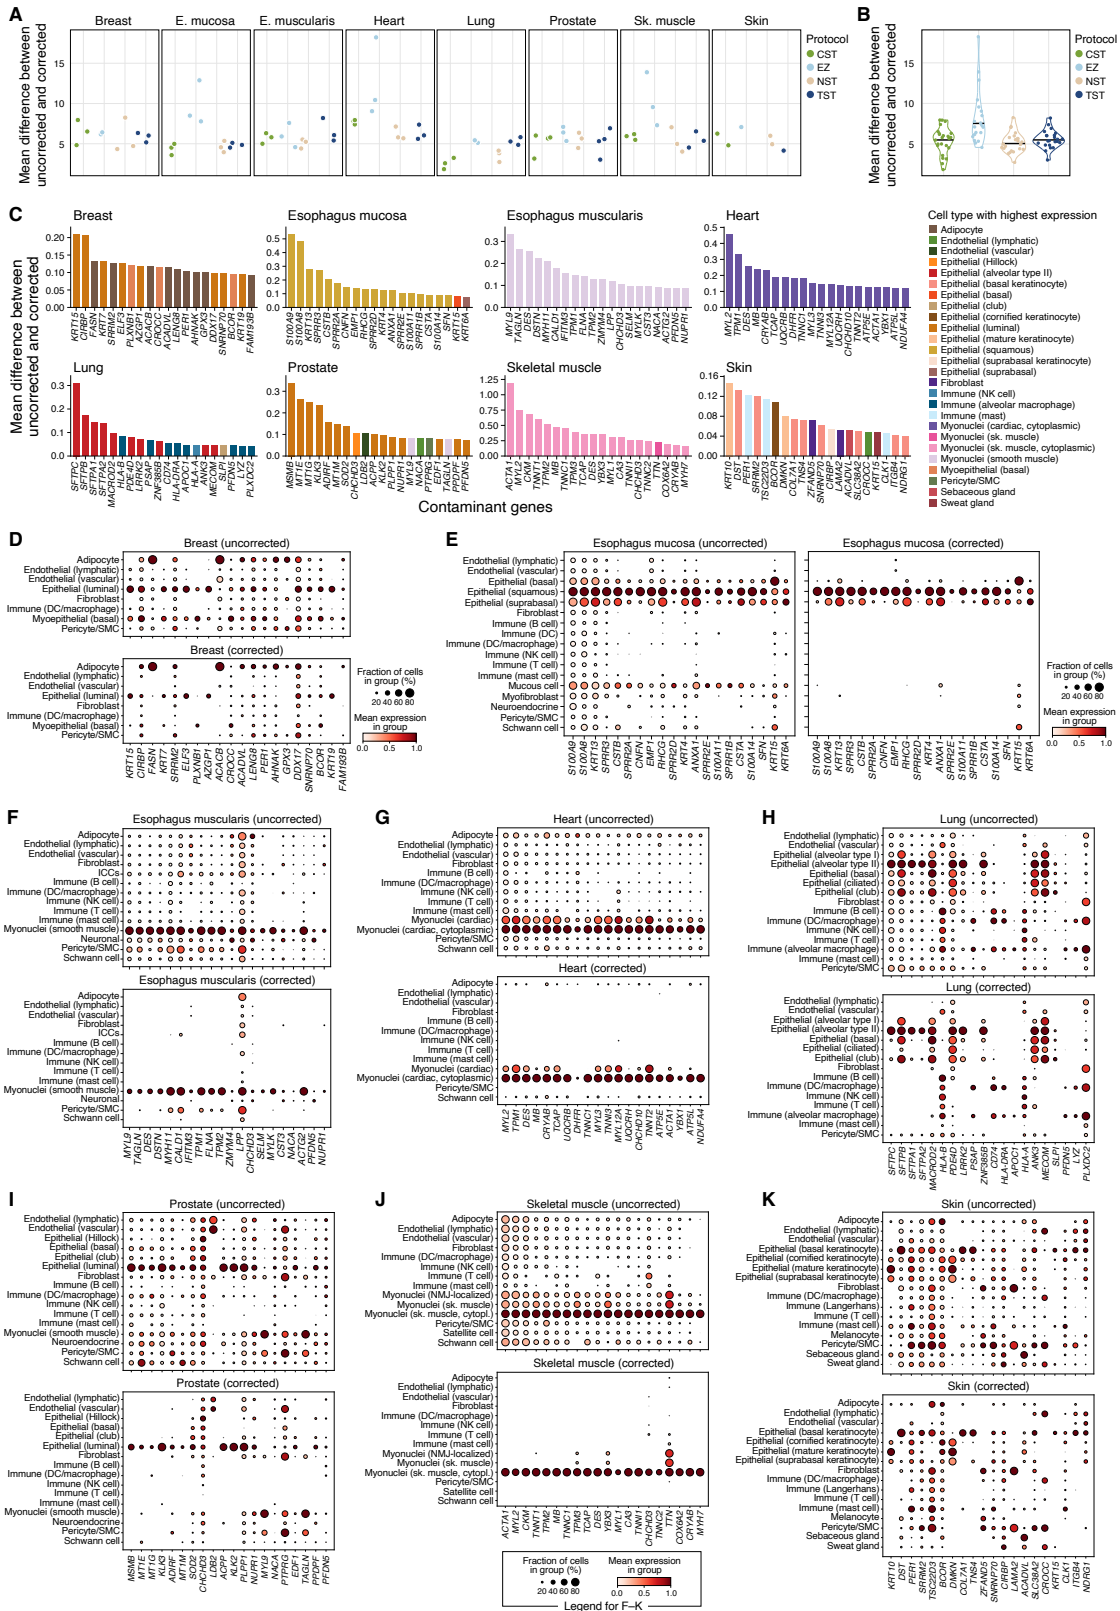

**Fig. S1. Ambient RNA correction improves cell type specificity of gene markers.** (A, B) Ambient contamination level. Average contamination level ( $y$ -axis,  $L2$ -norm of the difference between uncorrected and corrected  $\log(\text{TP10K}+1)$ -transformed expression levels averaged across genes) for each protocol and tissue (A) or for all samples from one protocol (B). Horizontal bar in violin plots: median. (C–K) Potential top sources of the ambient RNA. (C) Mean difference between corrected and uncorrected expression values ( $y$ -axis) for the top genes ( $x$ -axis) in each tissue, colored by their cell type of highest expression in the tissue (color legends). (D–K) Mean expression (circle color) and fraction of expressing cells (circle size) for each of the contaminant genes from (C) (columns) in each cell type (rows) in each tissue before and after the correction for ambient RNA (as labeled on top).

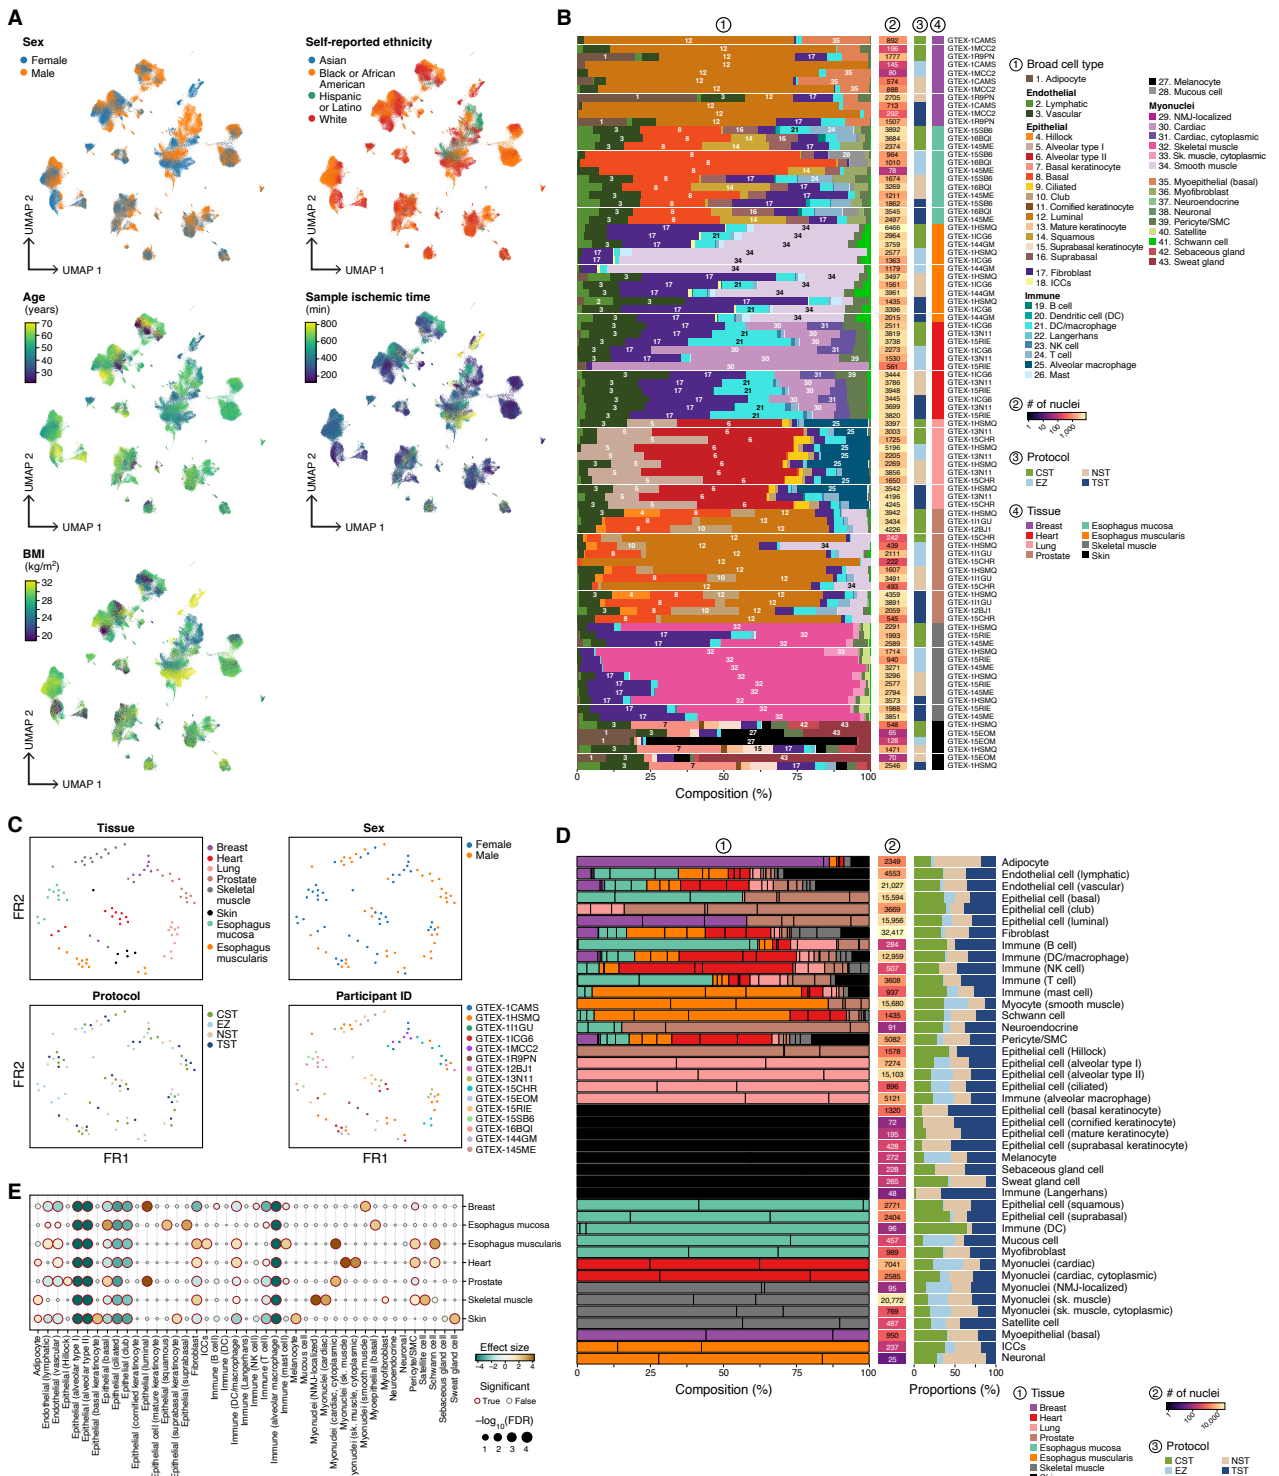

**Fig. S2. Characterization of the cross-tissue snRNA-seq atlas.** (A) Sample characteristics in integrated atlas. UMAP visualization of snRNA-seq profiles (as in **Fig. 1B**), colored by donor sex, self-reported ethnicity, age, BMI, and sample ischemic time. (B) Distinct cell type composition of each tissue. Overall proportion of cells (%) of each type (color legend) in each experiment (rows, 1), along with number of nuclei profiled (2), lab protocol (3), tissue (4) and specimen (label on right). Numbers on bars: broad cell type numbers (color legend). (C) EZ isolation protocol is more distinct. Force-directed graph layout embedding of samples (dots), where sample similarity is calculated based on cell type composition (28). Samples are colored by tissue, sex of the donor, nuclei prep and participant ID. (D,E) Tissue specific and shared cell types. (D) Overall proportion of cells from each cell subset (bars, (1)) that are derived from each tissue (colors; normalized for the total number of nuclei profiled in each tissue (28)), along with total number of nuclei from that cell type (2), and the proportion of nuclei from each protocol (3). Black vertical lines: relative proportion of nuclei from each individual. (E) Significance ( $-\log_{10}(\text{Benjamini-Hochberg FDR})$ , circle size) and effect size (circle color) of the differential abundances of each cell type (columns) in each tissue (rows) compared to lung as a reference. Samples with fewer than 30 nuclei are not shown.

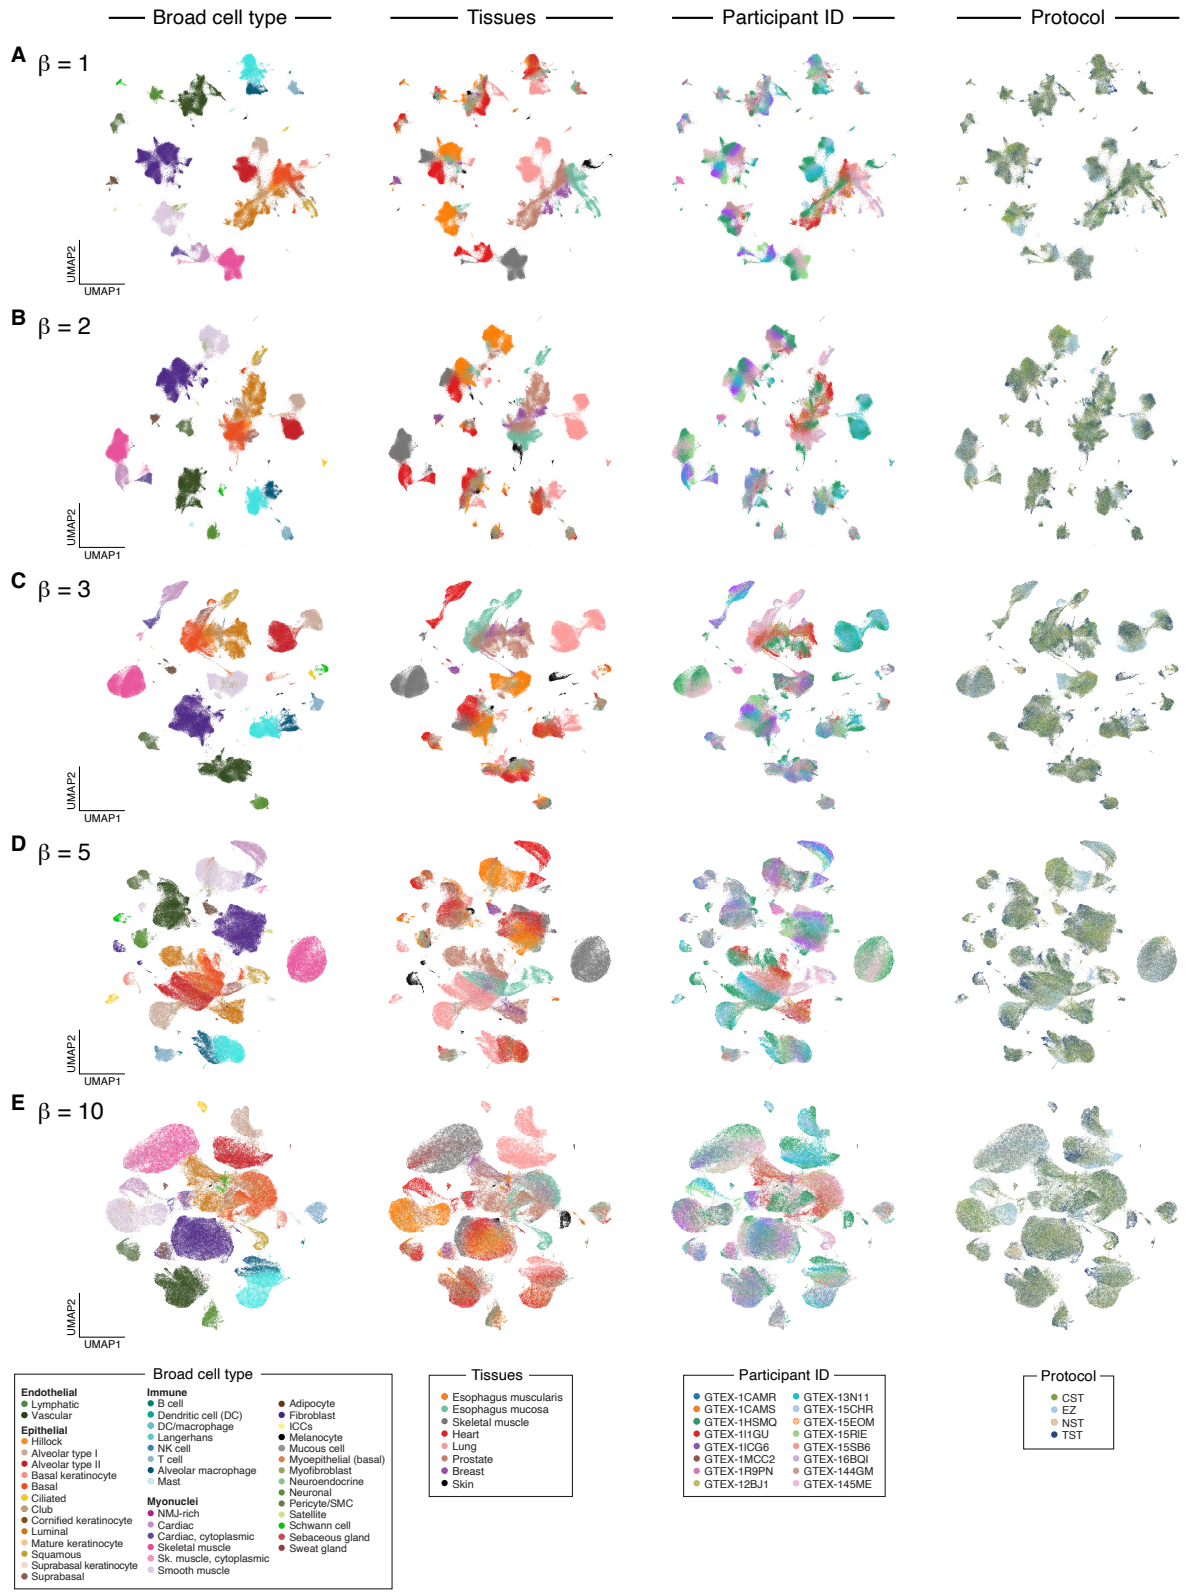

**Fig. S3. Hyperparameter sweep for the  $\beta$  parameter of the conditional variational autoencoder.** (A–E) Higher beta values over-smoothed data representations. UMAP representation of single-nucleus profiles (dots) colored (from left to right) by broad cell type, tissue, individual, or protocol using the mean latent space coordinates from conditional  $\beta$ -TCVAEs trained with beta hyperparameter values of (A) 1.0 (B) 2.0, (C) 3.0, (D) 5.0, and (E), 10.0 (28). The  $\beta$ -TCVAE with  $\beta = 2.0$  was selected to minimize loss of granularity.



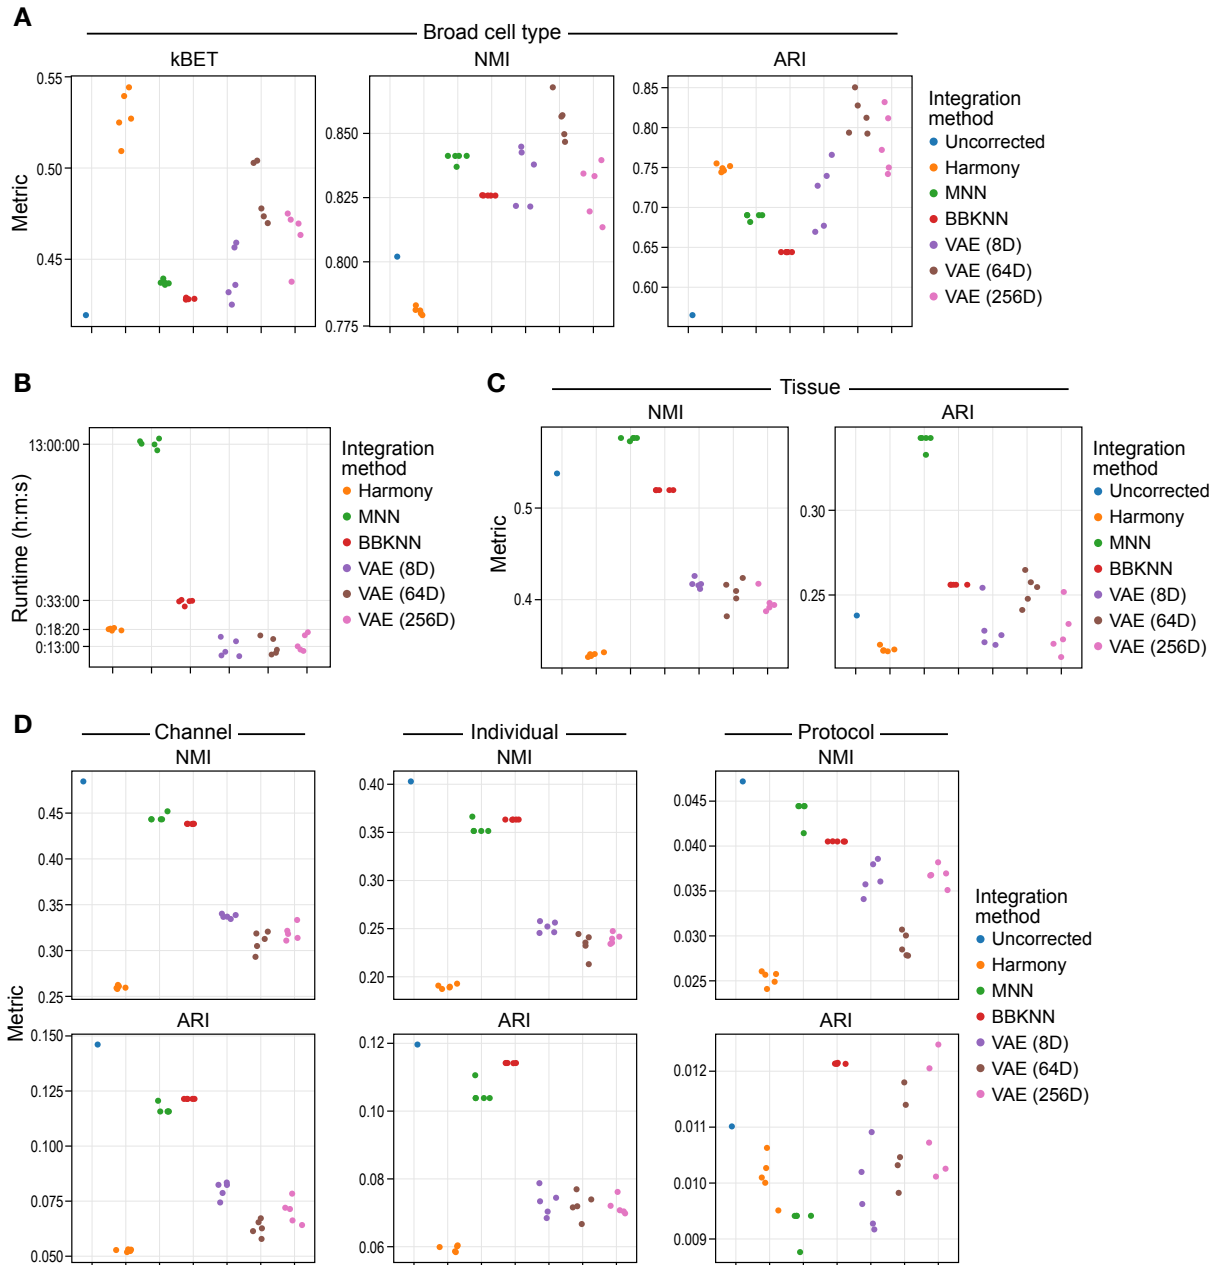

**Fig. S4. Benchmarking of TCVAE to other single cell profiling integration methods. (A)** Conservation of broad cell type variation. kBET (left), normalized mutual information (NMI, middle) and adjusted Rand index (ARI, right) metrics of cell type variation ( $y$ -axis) for uncorrected data and data integrated by each tested method (dot color,  $x$ -axis, (28)). **(B)** Runtime comparison. Runtime ( $y$ -axis, hour:minute:second) of each integration method (dot color,  $x$ -axis). **(C)** Conservation of tissue-specific variation. NMI (left) and ARI (right) metrics ( $y$ -axis) of tissue

specific variation in uncorrected data and data integrated by the tested methods ( $x$ -axis, dot color).

**(D)** Correction for unwanted effects. NMI (top) and ARI (bottom) metrics ( $y$ -axis) assessing remaining variation due to unwanted channel (batch, left), individual (middle) and protocol (right) effects after integration with each tested method (dot color,  $x$ -axis). In all panels, each dot is a different random integration run with different seeds performed on the full dataset.

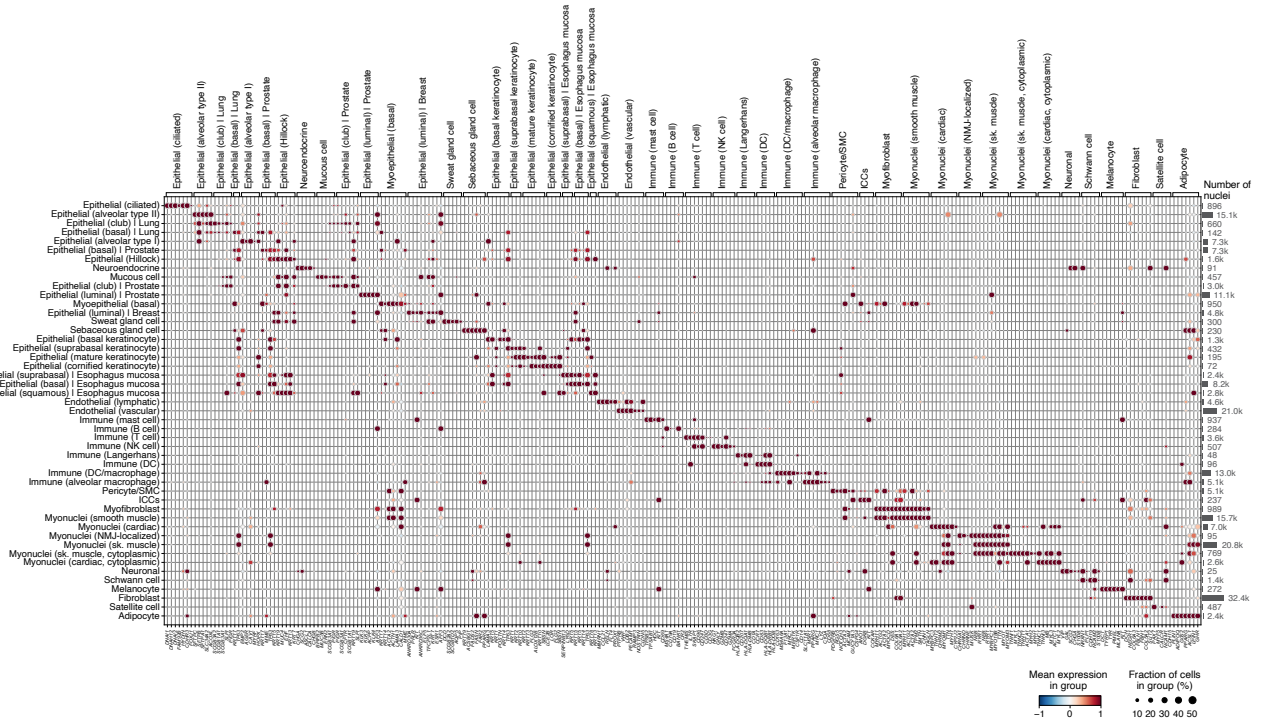

**Fig. S5. Broad cell type gene markers.** Scaled mean expression ( $z$ -score, circle color) and fraction of expressing cells (circle size) of marker genes (columns, labels at bottom) associated with each granular cell subset (rows, and labels on top) with epithelial cells with tissue-specific markers shown separately. Right: number of nuclei in each cell subset.

### A Breast

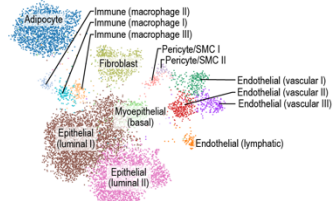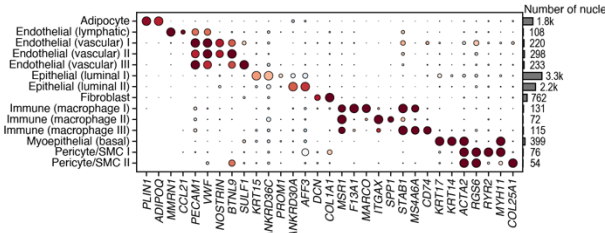

### B Esophagus mucosa

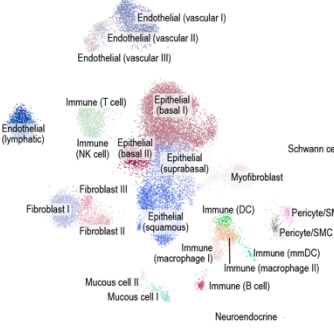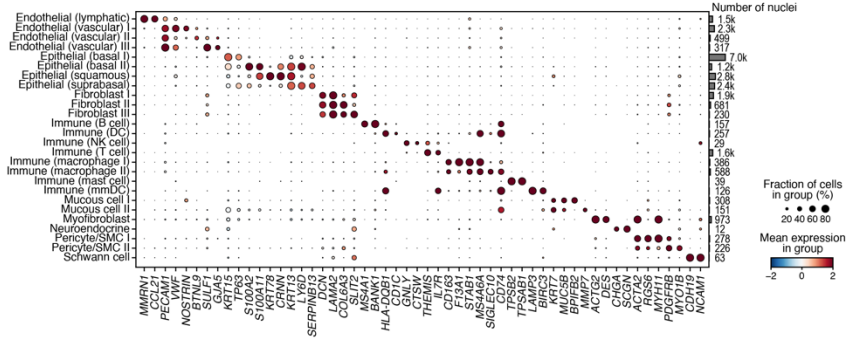

### C Esophagus muscularis

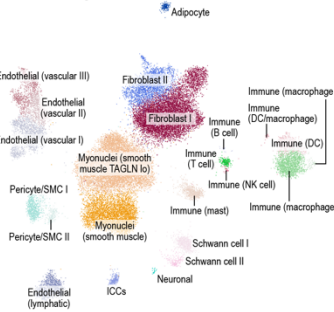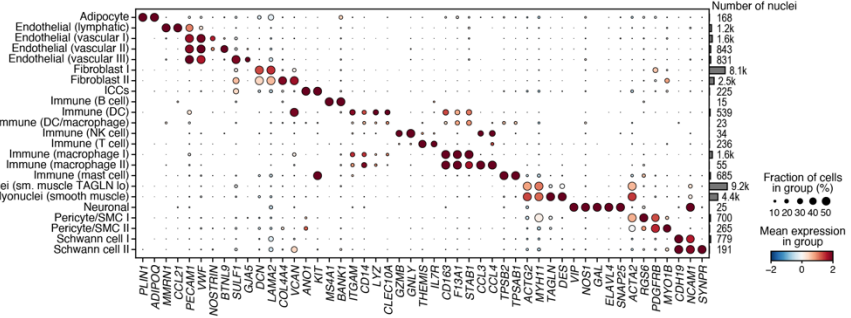

### D Heart

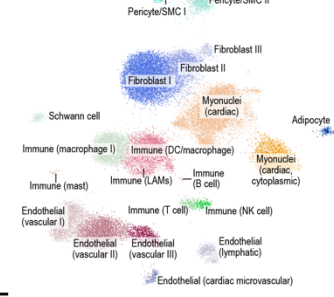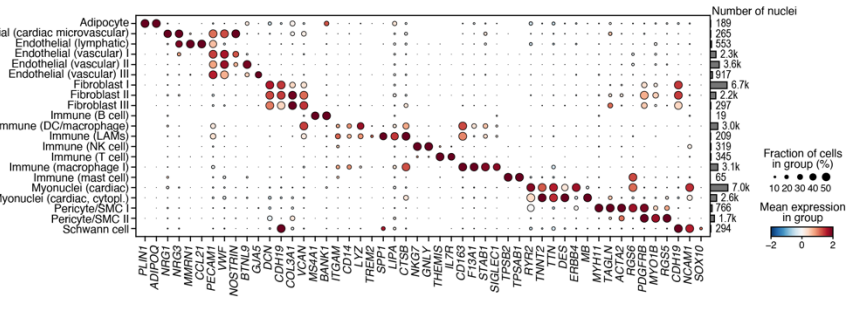

### E Lung

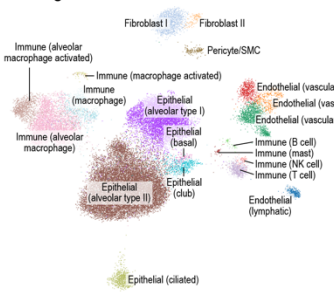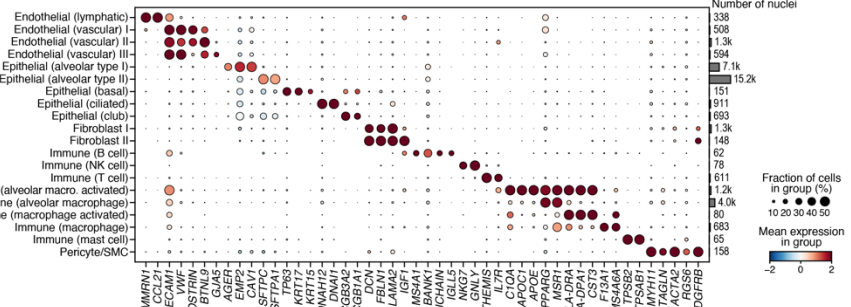

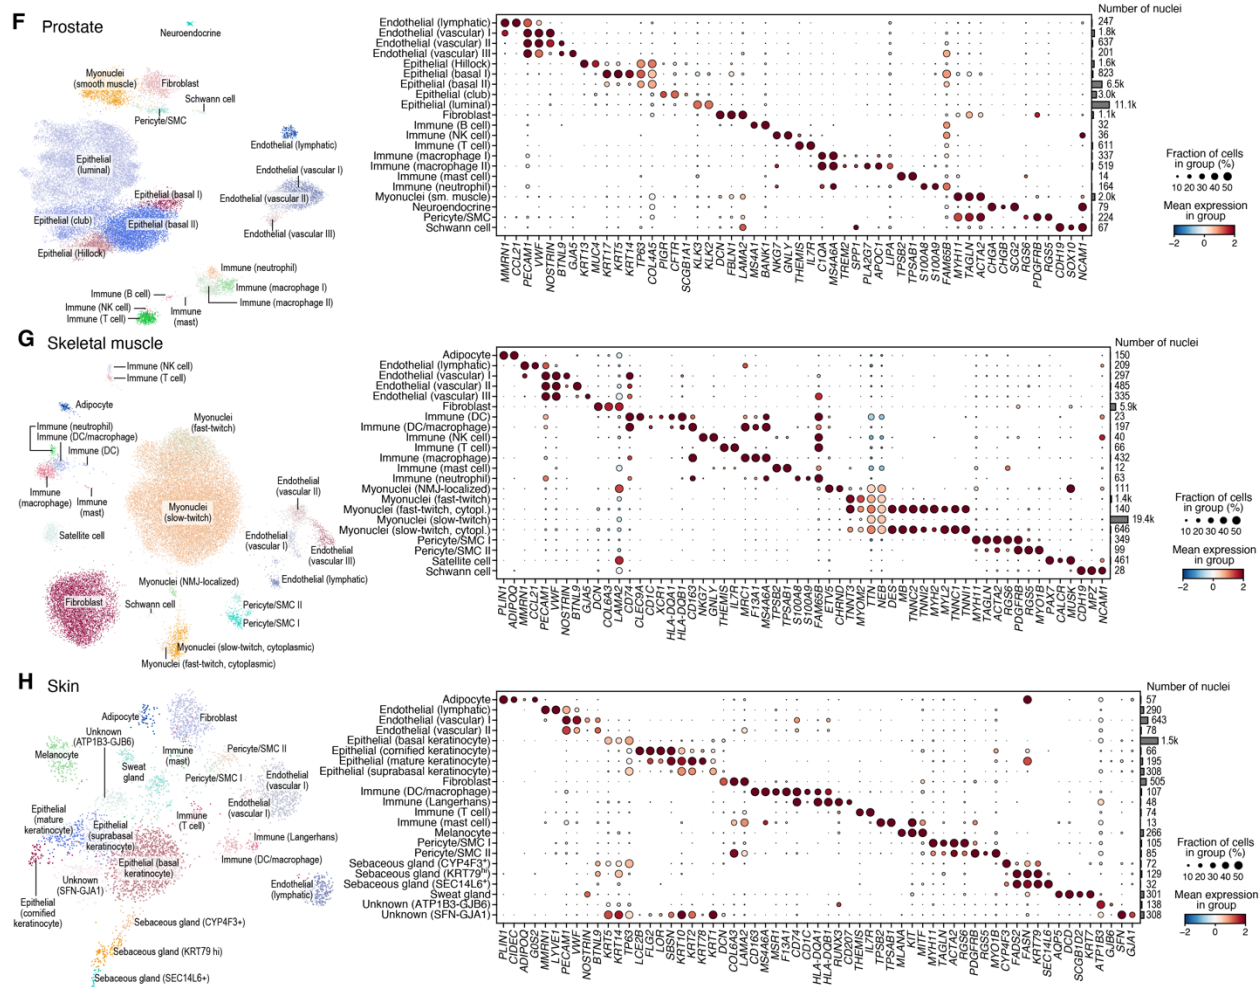

**Fig. S6. Granular cell subsets in each tissue.** UMAP visualization (left) of single nucleus profiles (dots) colored by granular cell type annotation and scaled mean expression (z-score, circle color) and fraction of expressing cells (circle size) of marker genes (columns, labels at bottom) associated with those subsets (rows, with nuclei number on right) for breast (A), esophagus mucosa (B), esophagus muscularis (C), heart (D), lung (E), prostate (F), skeletal muscle (G), and skin (H). Cell type numbering *within* each tissue (e.g., Fibroblast I) do not necessarily match across tissues.

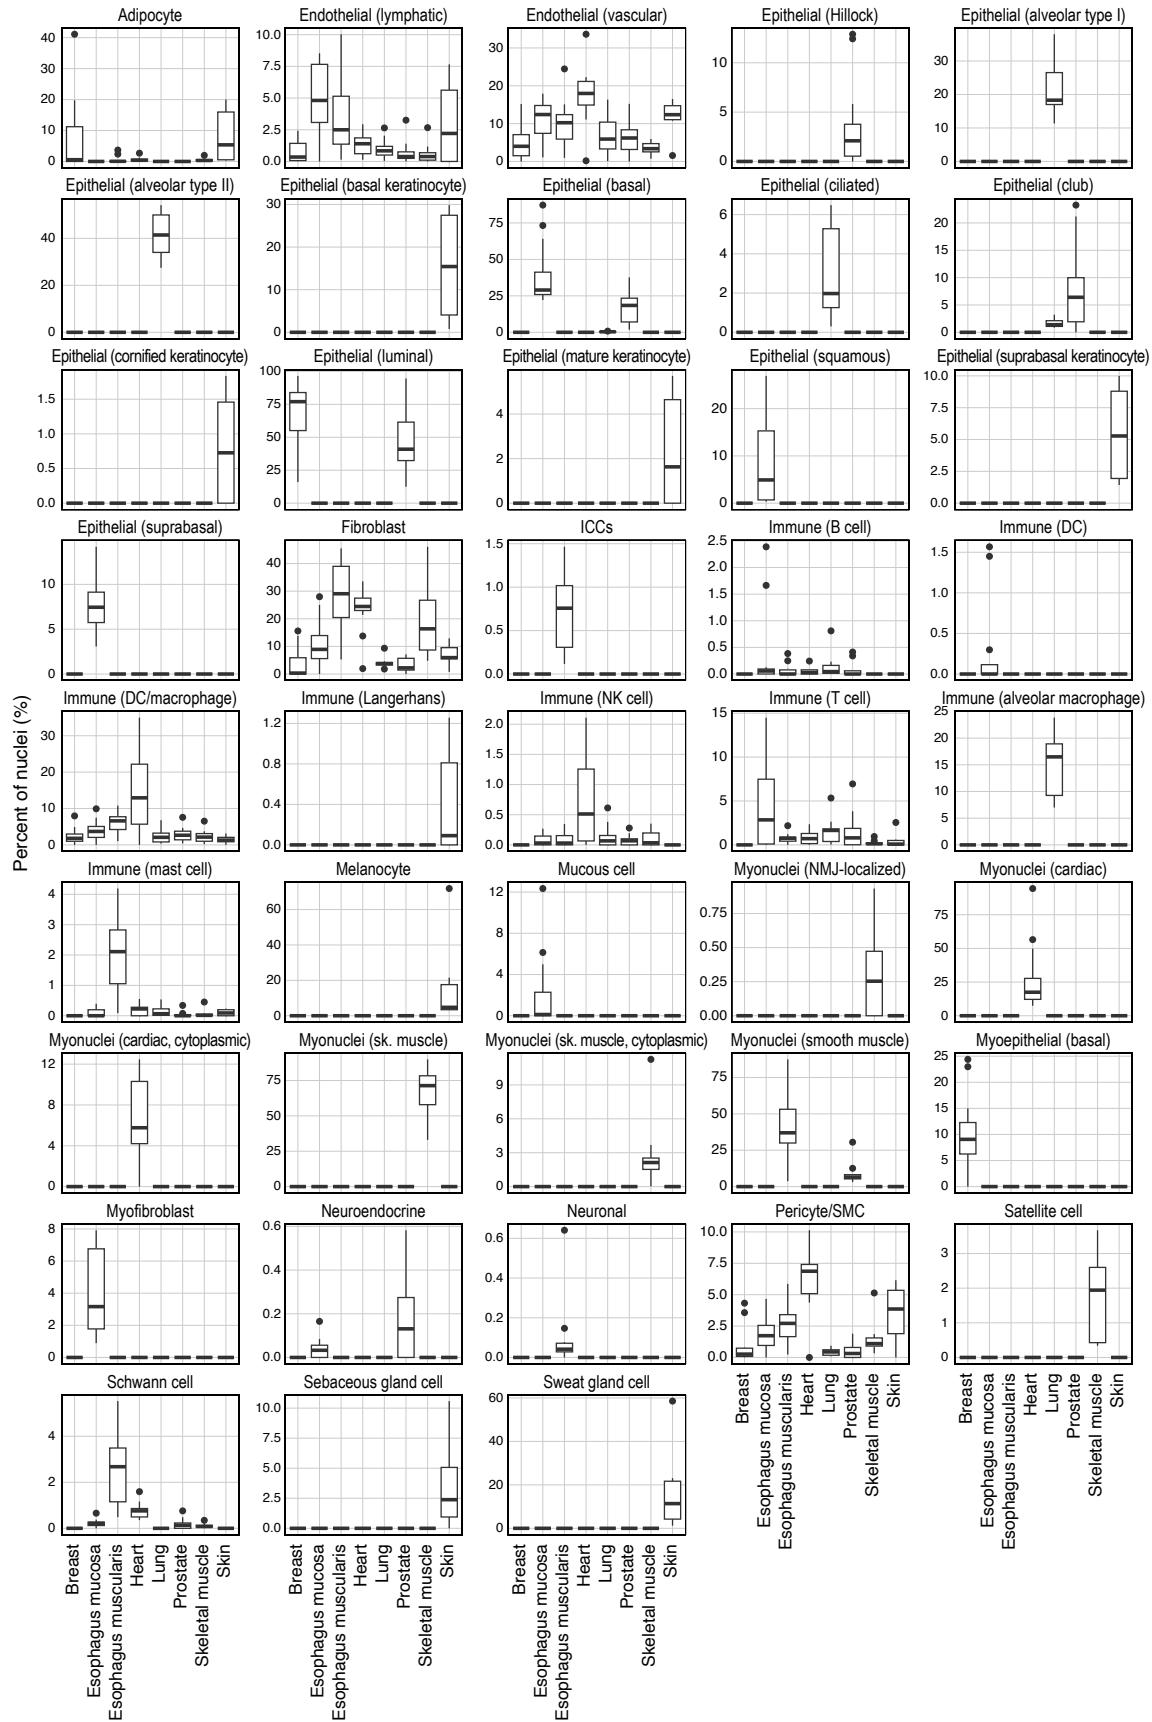

**Fig. S7. Distribution of broad cell type proportions within each tissue.** Distribution of proportions ( $y$ -axis) of each broad cell type (columns) within each tissue ( $x$ -axis). Box plots show median, quartiles, and whiskers at 1.5 IQR (interquartile range).



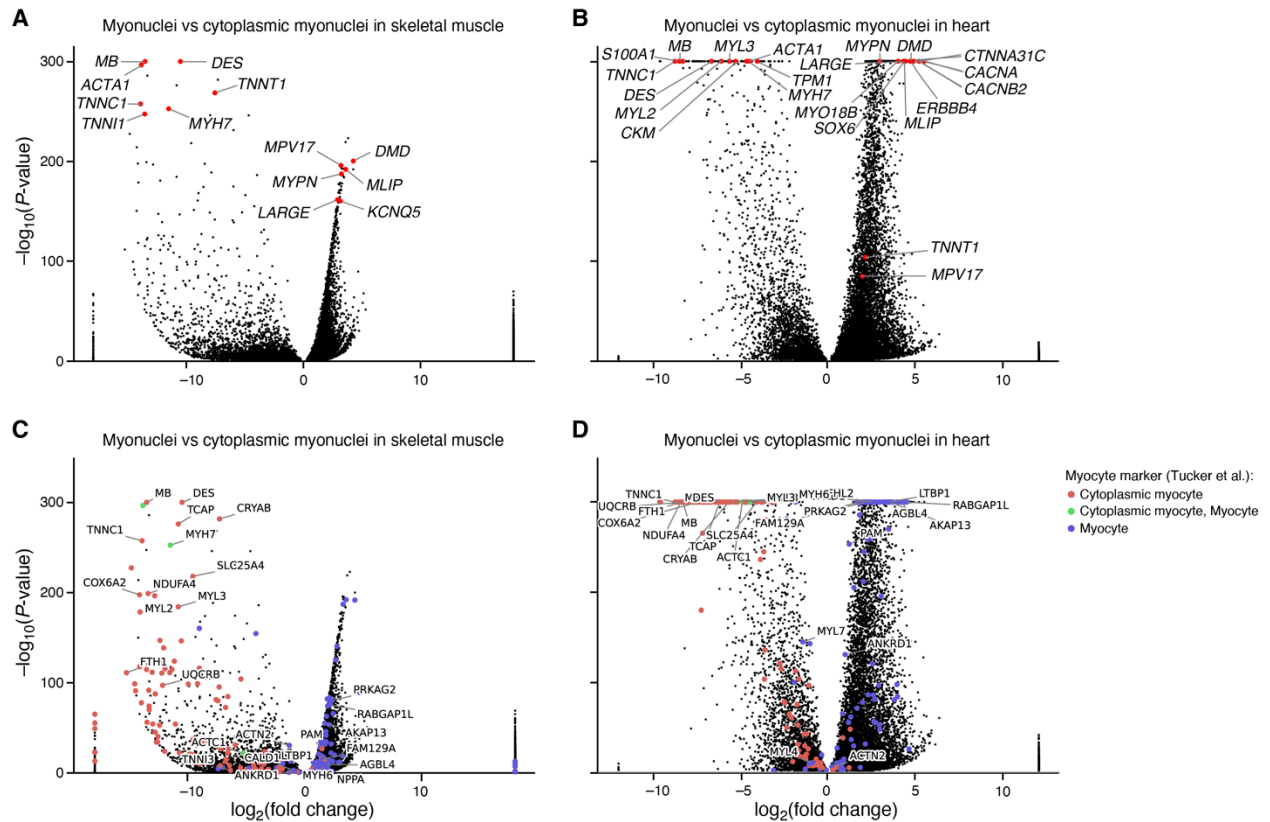

**Fig. S8. Biological distinctions between classical and cytoplasmic myonuclei.** Differential expression ( $\text{Log}_2(\text{fold-change})$ ,  $x$ -axis) and associated significance ( $-\log_{10}(P\text{-value})$ ,  $y$ -axis) between classical and cytoplasmic myonuclei in skeletal muscle (**A,C**) and heart (**B,D**), highlighting key genes (**A,B**) or markers of the two subsets from Tucker et al. (33) (**C,D**, dot color).



**A** Slow vs fast myocytes (cytoplasmic myonuclei)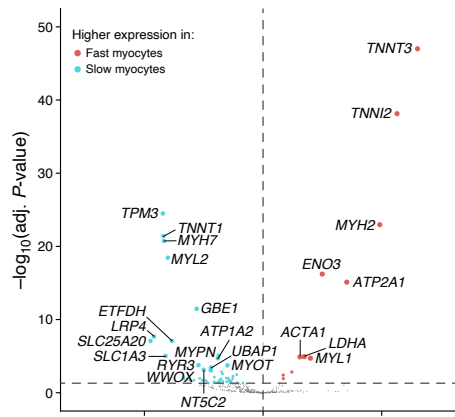**B** Slow vs fast myocytes (regular myonuclei)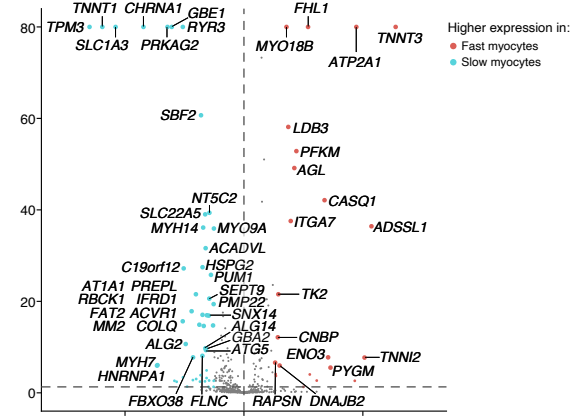**C** Slow vs fast myocytes (cytoplasmic myonuclei)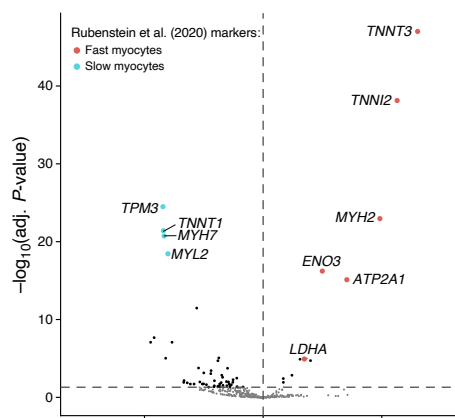**D** Slow vs fast myocytes (regular myonuclei)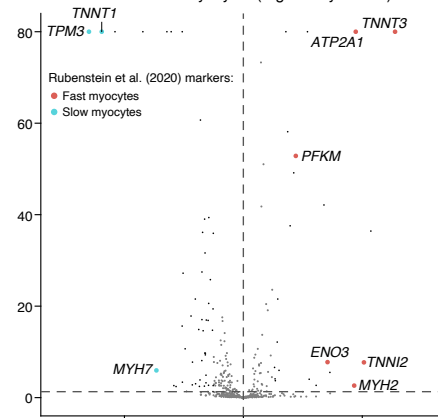**E** Slow vs fast myocytes (cytoplasmic myonuclei)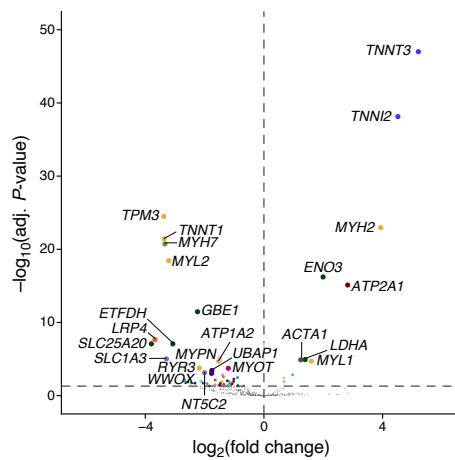**F** Slow vs fast myocytes (regular myonuclei)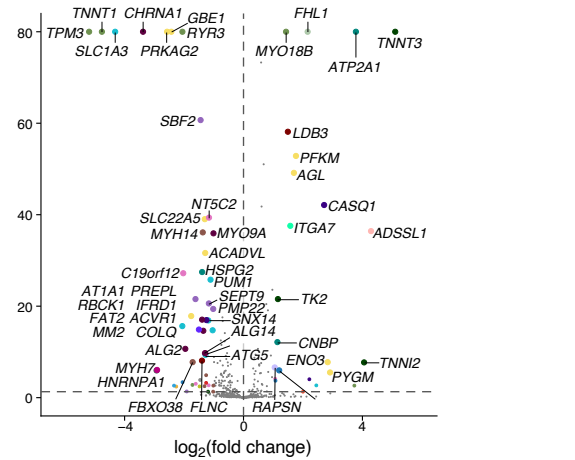

- Disease group, panel E
- Congenital muscular dystrophies, muscular dystrophies
  - Congenital muscular dystrophies, congenital myopathies
  - Congenital myasthenic syndromes
  - Congenital myopathies
  - Congenital myopathies, distal myopathies
  - Congenital myopathies, ion channel muscle diseases malignant hyperthermia
  - Congenital myopathies, other neuromuscular disorders
  - Hereditary ataxias
  - Hereditary ataxias, motor neuron diseases
  - Hereditary ataxias, other neuromuscular disorders
  - Hereditary motor and sensory neuropathies
  - Hereditary motor and sensory neuropathies, hereditary paraplegias, motor neuron diseases
  - Hereditary motor and sensory neuropathies, motor neuron diseases
  - Hereditary paraplegias
  - Hereditary paraplegias, muscular dystrophies, other myopathies
  - Metabolic myopathies
  - Motor neuron diseases
  - Muscular dystrophies
  - Muscular dystrophies, other myopathies
  - Distal myopathies, muscular dystrophies, other myopathies
  - Ion channel muscle diseases
  - Myotonic syndromes
  - Other neuromuscular disorders

- Disease group, panel F
- Congenital muscular dystrophies, congenital myasthenic syndromes, muscular dystrophies
  - Congenital muscular dystrophies, congenital myopathies
  - Congenital muscular dystrophies, muscular dystrophies
  - Congenital myopathies
  - Congenital myopathies, muscular dystrophies, other myopathies
  - Congenital muscular dystrophies
  - Congenital myasthenic syndromes
  - Congenital myasthenic syndromes, other neuromuscular disorders
  - Congenital myopathies, distal myopathies
  - Congenital myopathies, motor neuron diseases
  - Hereditary ataxias
  - Hereditary motor and sensory neuropathies
  - Hereditary motor and sensory neuropathies, hereditary paraplegias
  - Hereditary motor and sensory neuropathies, motor neuron diseases
  - Hereditary paraplegias
  - Hereditary paraplegias, hereditary motor and sensory neuropathies
  - Motor neuron diseases
  - Motor neuron diseases, other neuromuscular disorders
  - Other myopathies
  - Other neuromuscular disorders
  - Distal myopathies
  - Distal myopathies, other myopathies
  - Metabolic myopathies
  - Muscular dystrophies, other myopathies
  - Myotonic syndromes

**Fig. S9. Classical and cytoplasmic skeletal muscle myonuclei from slow and fast myocytes express distinct signature and monogenic muscle disease genes.** Differential expression ( $\text{Log}_2(\text{fold-change})$ ,  $x$ -axis) and associated significance ( $-\log_{10}(P\text{-value})$ ,  $y$ -axis) between slow and fast myocyte subtypes within cytoplasmic (**A, C, E**) and classical myonuclei (**B, D, F**), with genes highlighted (dot color) based on differential expression (A,B), known markers of fast vs. slow subsets (C,D) (36), and monogenic disease status (E,F) (28).

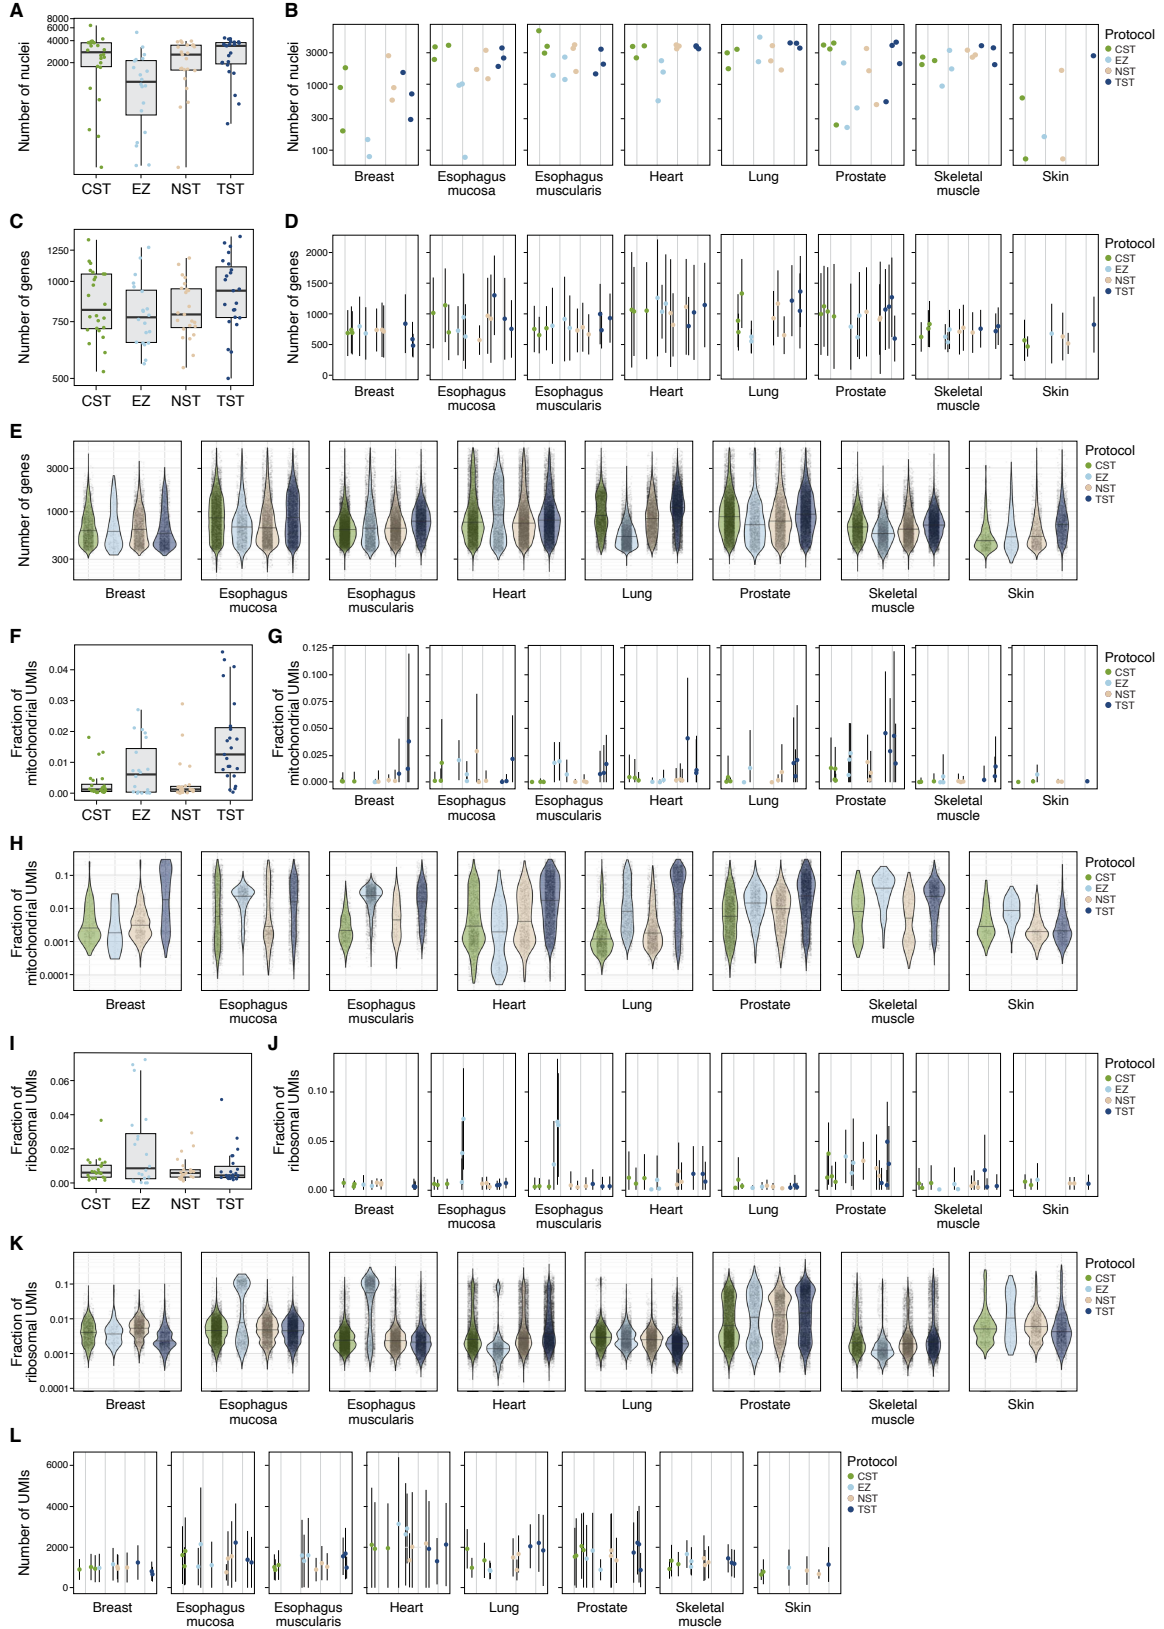

**Fig. S10. Relative benchmarking of four snRNA-seq protocols on different QC measures.**

**(A, B)** Number of recovered nuclei. Distribution (A) and number (B) of high-quality nuclei profiles ( $y$ -axis) recovered from each protocol in aggregate (A,  $x$ -axis) and for each sample in each tissue (B,  $x$ -axis). **(C–E)** Number of recovered genes. Distribution (C, E) and mean number (D) of genes ( $y$ -axis) recovered from each protocol in aggregate (C,  $x$ -axis), for each sample in each tissue (D,  $x$ -axis), and for each protocol in each tissue (E,  $x$ -axis). **(F–H)** Fraction of mitochondrial transcripts. Distribution (F, H) and mean (G) of the fraction of mitochondrial transcripts ( $y$ -axis, Unique Molecular Identifiers (UMIs)) recovered from each protocol in aggregate (F,  $x$ -axis), for each sample in each tissue (G,  $x$ -axis), and for each protocol in each tissue (H,  $x$ -axis). **(I–K)** Fraction of ribosomal transcripts. Distribution (I, K) and mean (J) of the fraction of ribosomal transcripts ( $y$ -axis, UMIs) recovered from each protocol in aggregate (F,  $x$ -axis), for each sample in each tissue (G,  $x$ -axis), and for each protocol in each tissue (H,  $x$ -axis). **(L)** Number of transcripts. Mean number of UMIs ( $y$ -axis) in each sample in each tissue. Box plots show median, quartiles, and whiskers at 1.5 IQR (interquartile range). The horizontal bar in violin plots represents the median. Error bars in (D,G,J,L) show one standard deviation above and below the mean.

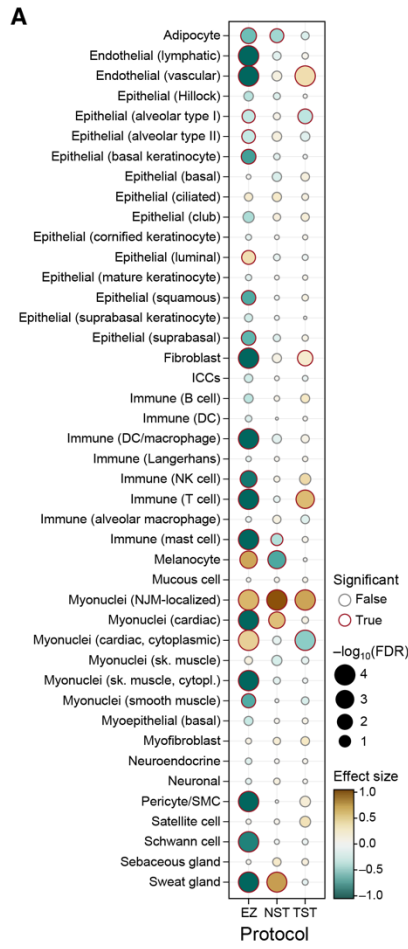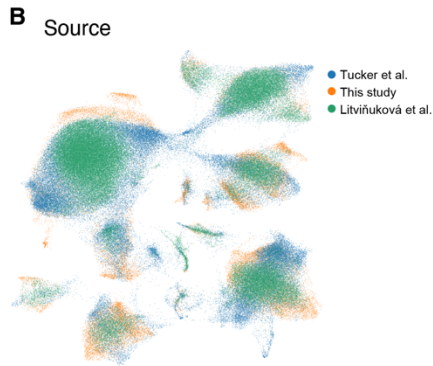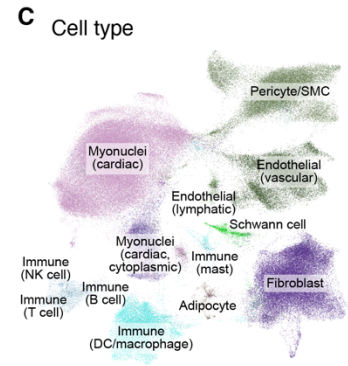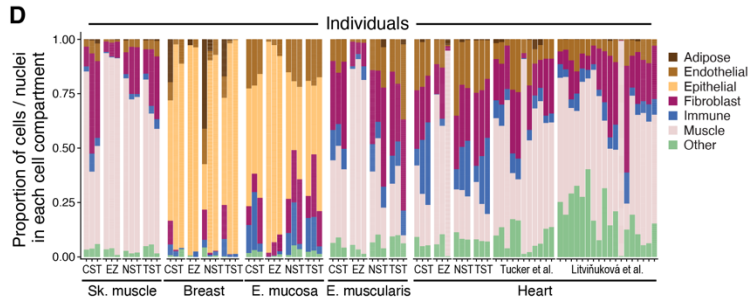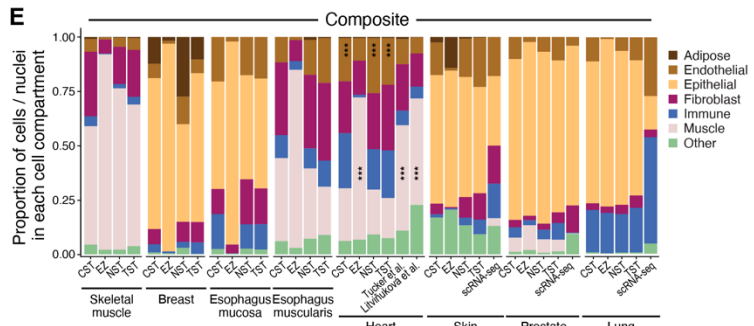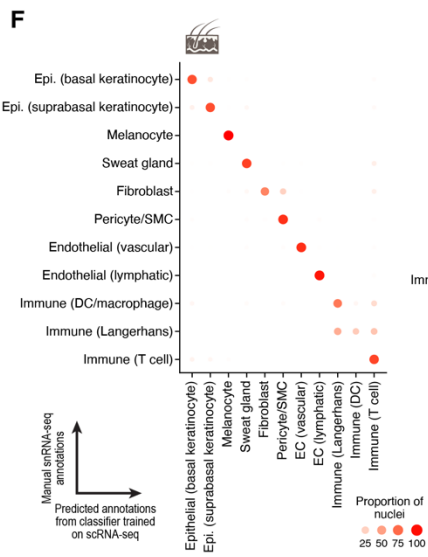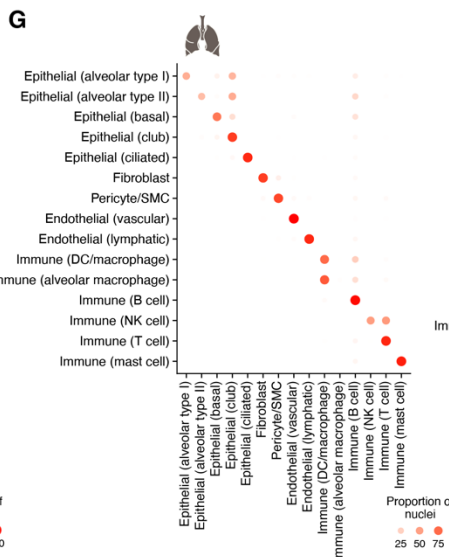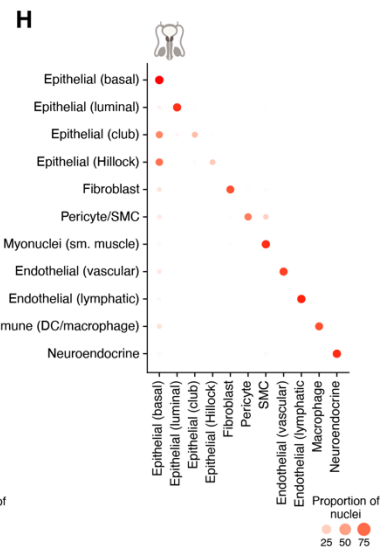

**Fig. S11. Benchmarking of snRNA-seq protocols by cell composition and comparison to scRNA-seq. (A–E)** Impact of snRNA-seq protocol on recovered cell composition. **(A)** Significance (Benjamini–Hochberg FDR < 0.1; circle outline color) of the enrichment of each cell type (rows) in each protocol (columns) relative to the CST protocol across all tissues and samples after correction for tissue specific effects (28). **(B,C)** UMAP representation of snRNA-seq profiles (after batch correction by individual with Harmony (184), (28) colored by study **(B)** and cell type **(C)**. **(D)** Proportion of cells or nuclei (*y*-axis) across broad cell groups (color legend) in each sample (*x*-axis), stratified by tissue and protocol. **(E)** Proportion of cells or nuclei (*y*-axis) across broad cell groups (color legend) in each tissue (*x*-axis), stratified by tissue and protocol. Asterisks indicate significantly higher (muscle EZ, Tucker et al. (33) and Litviňuková et al. (34)) or lower (endothelial, Tucker et al. (33) and Litviňuková et al. (34)) proportions compared to the CST protocol (Dirichlet regression, Benjamini–Hochberg FDR < 0.01, (28)). **(F–H)** Agreement in cell-intrinsic expression profiles between scRNA-seq and snRNA-seq. Proportion of nuclei (circle size and color) of each subset (rows) that are predicted to be in each cell class (columns) by a random forest classifier trained on cells, for skin **(F)**, lung **(G)** or prostate **(H)**.

### A Tissue site

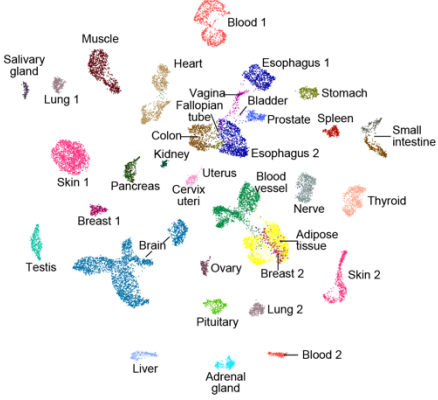

### B Tissue site detail

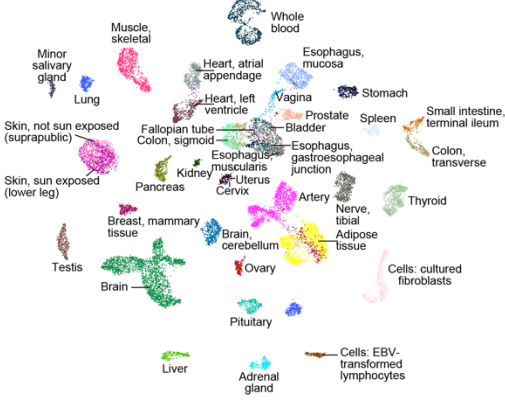

### C Bulk-pseudobulk co-embedding

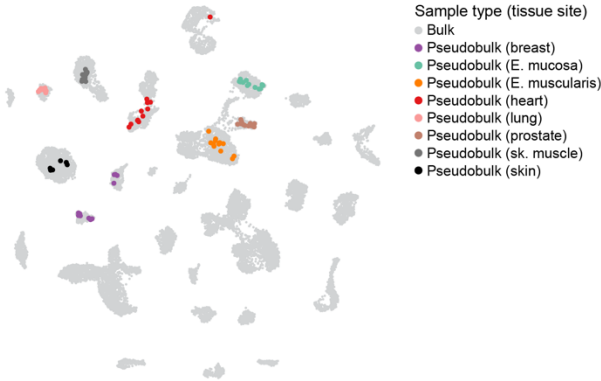

### D

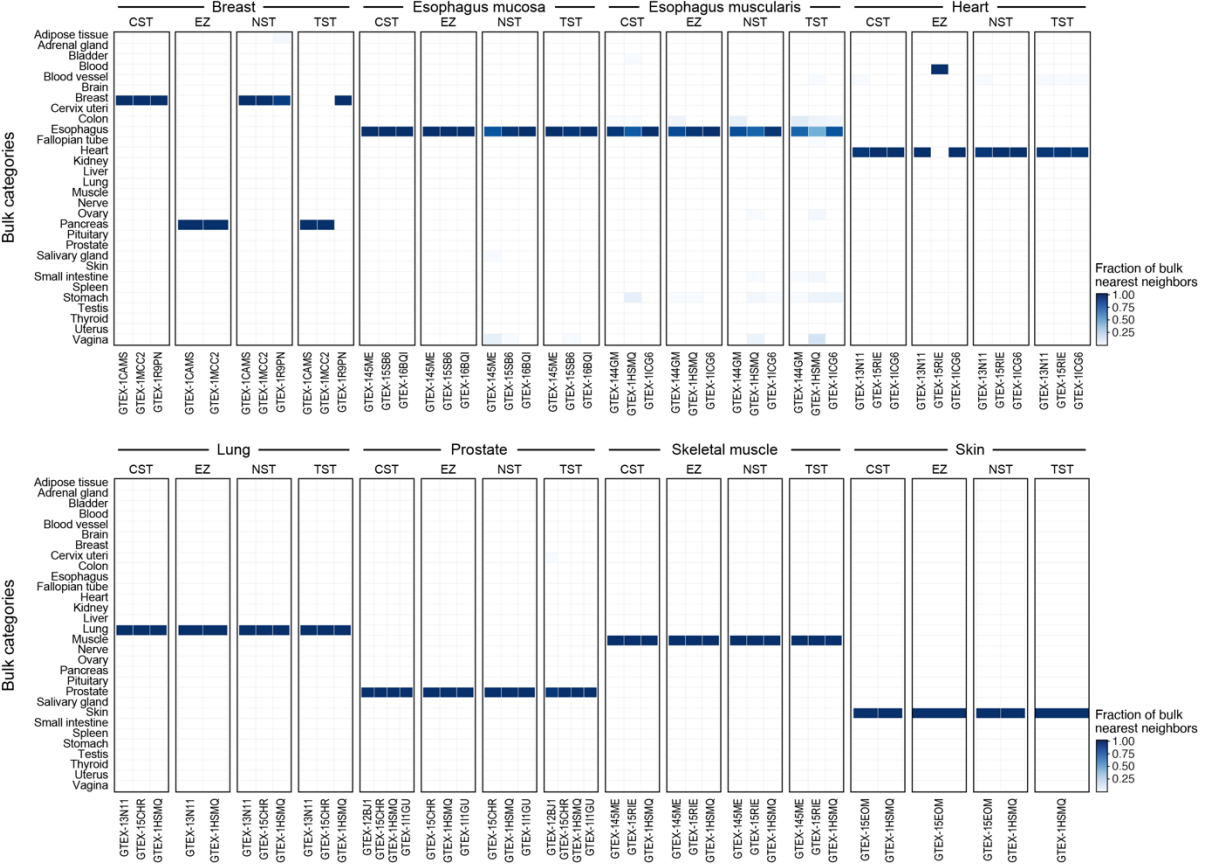

**Fig. S12. snRNA-Seq pseudobulk matches bulk RNA-seq of matched samples.** (A–C) Co-embedding of bulk and pseudobulk RNA-seq profiles. UMAP representation of bulk RNA-seq and pseudobulk snRNA-seq samples (dots), with each sample colored by tissue site (A) detailed tissue site (B) or highlighting only the pseudobulk samples from each site (C) (28). (D) Co-embedding successfully places bulk and pseudobulk samples from the same tissue in proximity, as shown by the fraction of bulk nearest neighbors (color bar) of each pseudobulk sample (columns) that are derived from each tissue site (rows).



Prostate

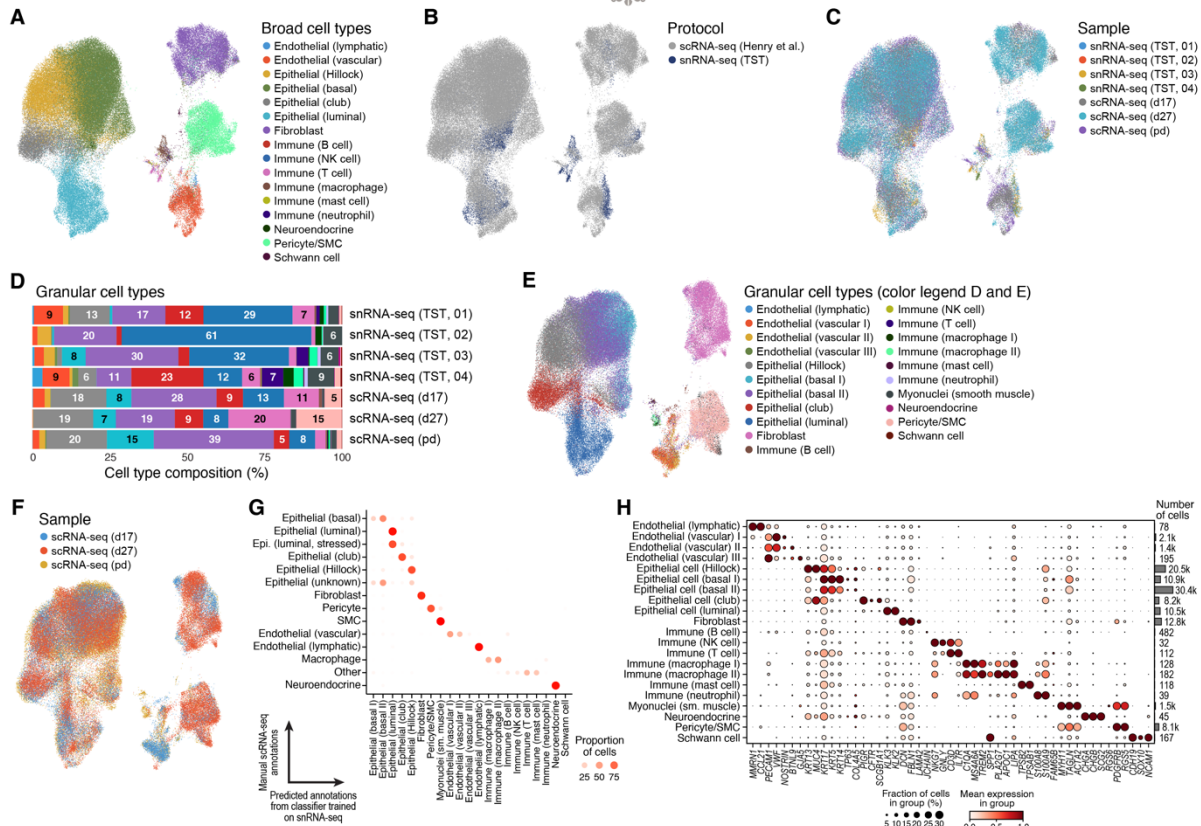

Skin

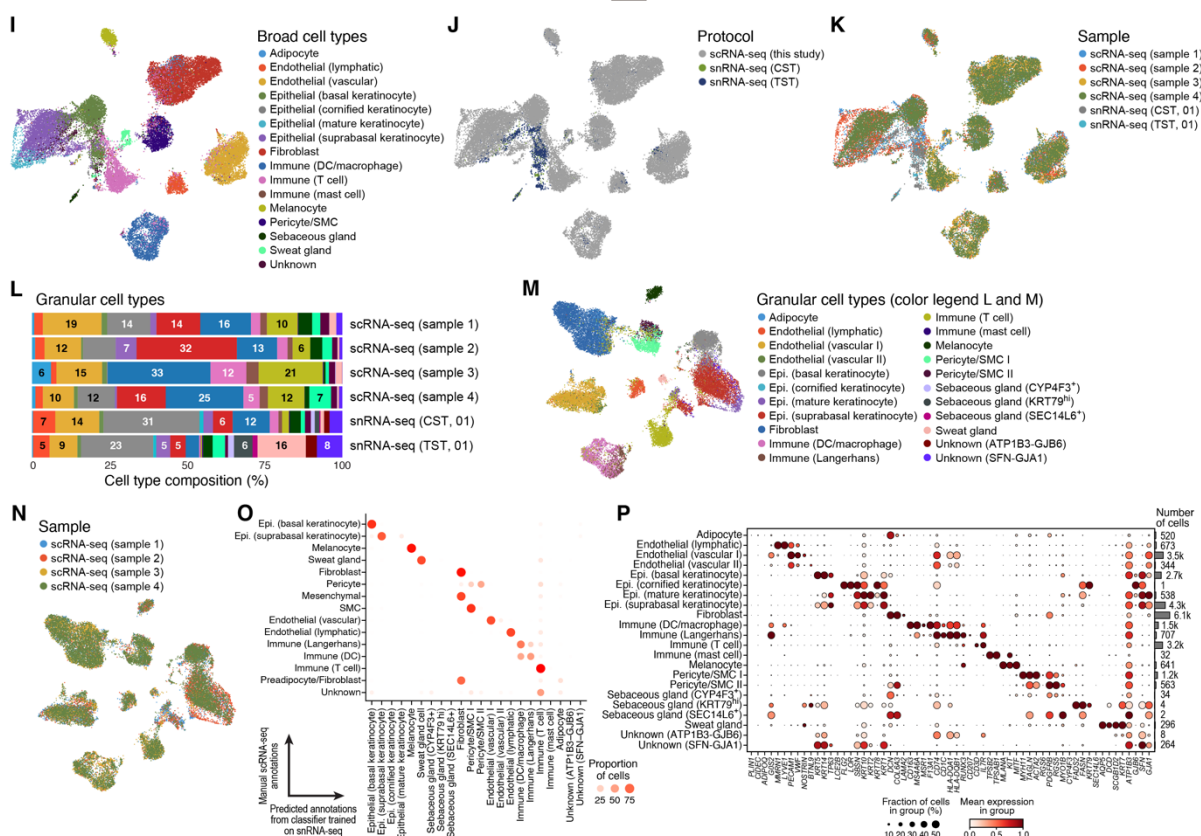

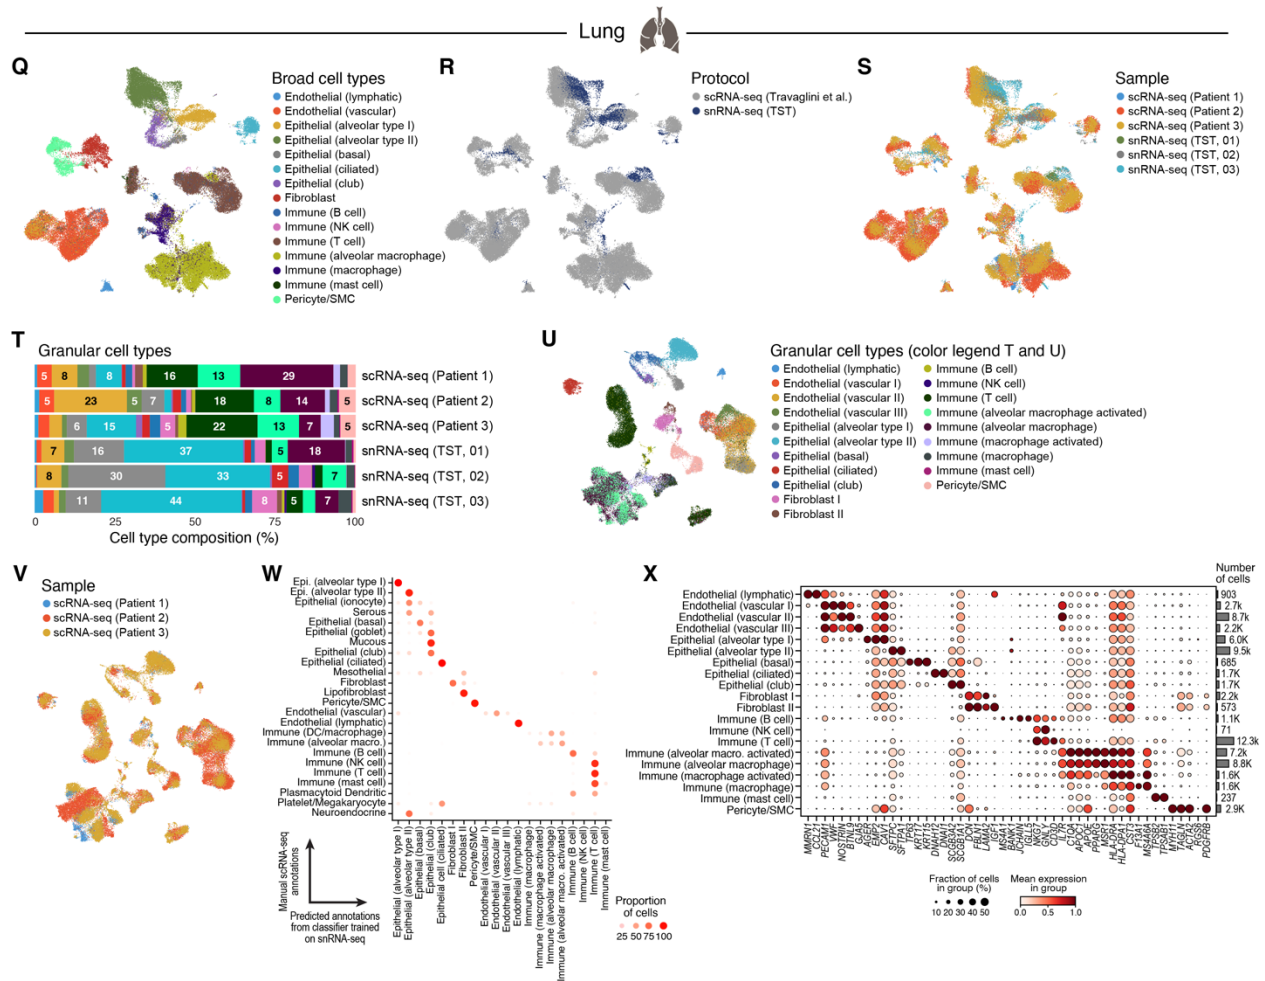

**Fig. S13. Integration and annotation of single-cell and single-nucleus RNA-seq prostate, skin and lung datasets. (A–H)** Integration of scRNA-seq and snRNA-seq in the prostate (28). (A–C) UMAP representation of integrated scRNA-seq (Henry et al. (38)) and snRNA-Seq (current study, TST) colored by predicted granular cell types collapsed into broad categories (A), protocol (B) or sample (C). (D) Comparison of cell composition between scRNA-seq and snRNA-seq. Proportion of predicted granular cell types (bar color) based on a classifier trained on snRNA-seq data. Numbers on bars: proportion of cell type within sample. (E,F) Cell type annotation in scRNA-seq. UMAP representation only of scRNA-seq profiles (Henry et al. (38)) colored by predicted granular cell types (E) or samples (F). (G,H) Agreement in cell-intrinsic expression profiles between single-

cell and single-nucleus datasets. (G) Proportion of cells (circle size and color) of each subset (rows) that are predicted to be in each nucleus class (columns) by a random forest classifier trained on nuclei for prostate. (H) Scaled mean scRNA-seq expression ( $z$ -score, circle color) and fraction of expressing cells (circle size) of granular cell type marker genes (as in **Fig. S6**, columns, labels at bottom) associated with those subsets (rows, with nuclei number on right).

**(I–P)** Integration of scRNA-seq and snRNA-seq in the skin (28). **(I–K)** UMAP representation of integrated scRNA-seq (current study) and snRNA-seq (current study, CST and TST) colored by predicted granular cell types collapsed into broad categories (I), protocol (J) or sample (K). **(L)** Comparison of cell composition between scRNA-seq and snRNA-seq. Proportion of predicted granular cell types (bar color) based on a classifier trained on snRNA-seq data. Numbers on bars: proportion of cell type within sample. **(M,N)** Cell type annotation in scRNA-Seq. UMAP representation only of scRNA-seq profiles (current study) colored by predicted granular cell types (M) or samples (M). **(O–P)** Agreement in cell-intrinsic expression profiles between single-cell and single-nucleus datasets. (O) Proportion of cells (circle size and color) of each subset (rows) that are predicted to be in each nucleus class (columns) by a random forest classifier trained on nuclei for prostate. (P) Scaled mean scRNA-seq expression ( $z$ -score, circle color) and fraction of expressing cells (circle size) of granular cell type marker genes (as in **Fig. S6**, columns, labels at bottom) associated with those subsets (rows, with nuclei number on right).

**(Q–X)** Integration of scRNA-seq and snRNA-seq in the lung (28). **(Q–S)** UMAP representation of integrated scRNA-seq (Travaglini et al.(40)) and snRNA-seq (current study, TST) colored by predicted granular cell types collapsed into broad categories (Q), protocol (R) or sample (S). **(T)** Comparison of cell composition between scRNA-seq and snRNA-seq. Proportion of predicted granular cell types (bar color) based on a classifier trained on snRNA-seq data. Numbers on bars: proportion of cell type within sample. **(U,V)** Cell type annotation in scRNA-Seq. UMAP

representation only of scRNA-seq profiles (Travaglini et al. (40)) colored by predicted granular cell types (U) or samples (V). (W,X) Agreement in cell-intrinsic expression profiles between single-cell and single-nucleus datasets. (W) Proportion of cells (circle size and color) of each subset (rows) that are predicted to be in each nucleus class (columns) by a random forest classifier trained on nuclei for prostate. (X) Scaled mean scRNA-seq expression ( $z$ -score, circle color) and fraction of expressing cells (circle size) of granular cell type marker genes (as in **Fig. S6**, columns, labels at bottom) associated with those subsets (rows, with nuclei number on right).

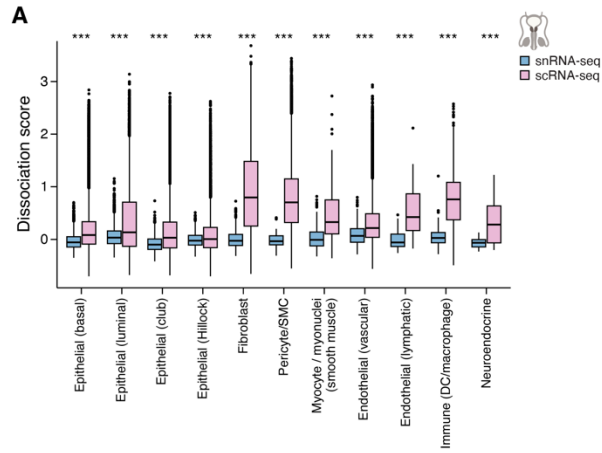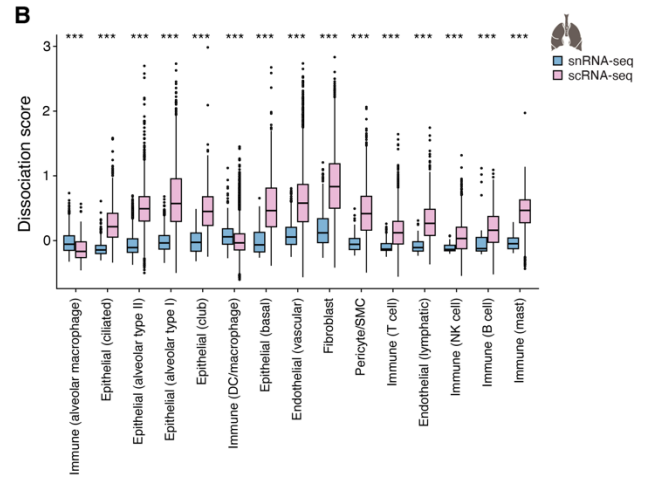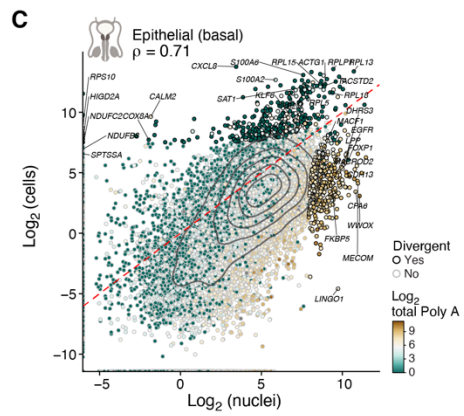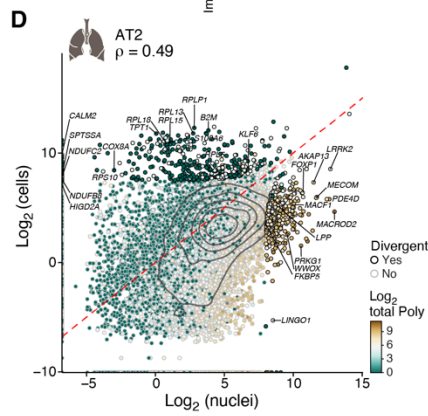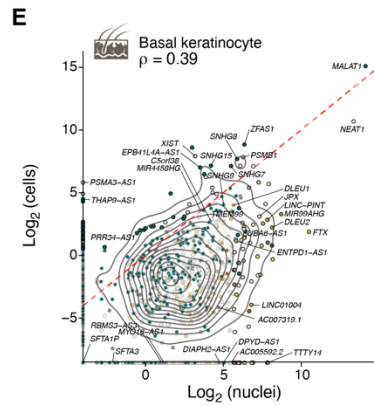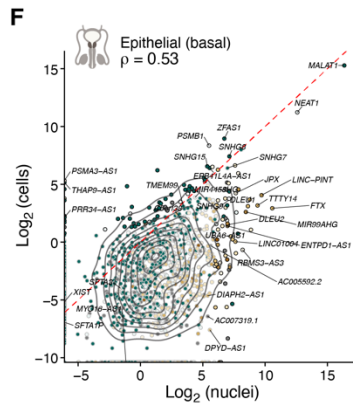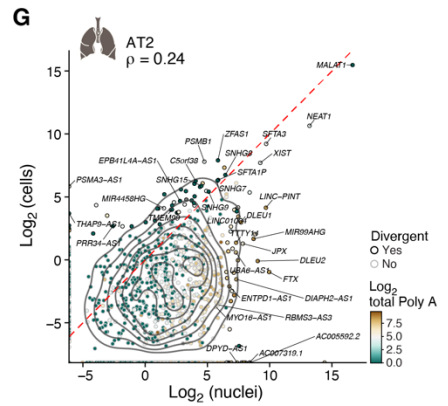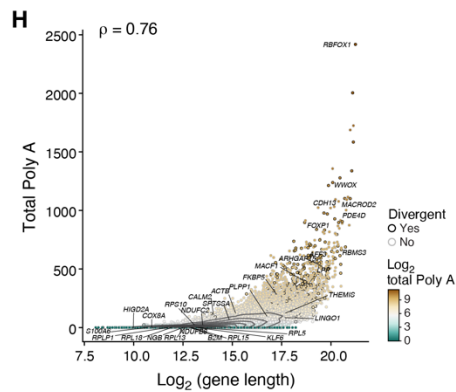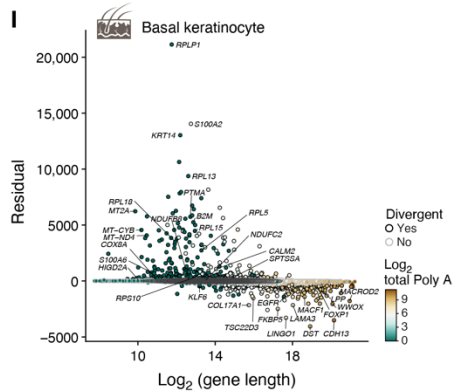

### Fig. S14. Differences in gene expression between snRNA-seq and scRNA-seq

**(A, B)** Expression of tissue dissociation signatures are accentuated in scRNA-seq but not snRNA-seq. Distribution of the score ( $y$ -axis, average background corrected,  $\log(\text{TP10K}+1)$ ) of a dissociation signature ( $4I$ ) in scRNA-seq (pink) and snRNA-seq (blue) profiles in each major lung cell type category ( $x$ -axis). (\*\*\*) Benjamini-Hochberg FDR  $< 10^{-16}$ , Wilcoxon rank-sum test). Box plots show median, quartiles, and whiskers at 1.5 IQR (interquartile range). **(C–G)** Limited divergence of gene expression between scRNA-seq and snRNA-Seq. Averaged pseudobulk expression values (28) of genes (dots) in nuclei ( $x$ -axis) and cells ( $y$ -axis), shown for protein-coding genes in **(C)** prostate epithelial (basal) cells **(D)** lung alveolar type II cells, and long non-coding (LINC) RNA genes in **(E)** skin basal keratinocytes, **(F)** prostate epithelial cells (basal), and **(G)** lung alveolar type II cells. Divergent genes (dot outline color) deviating from straight line regression fit by size of residuals (28). Color scale: total length of polyA stretches with at least 20 adenine bases. **(H, I)** Relation between gene expression differences in nuclei vs. cells, gene length and polyA stretches. **(H)** The number of polyA stretches ( $y$ -axis) and length ( $x$ -axis) of each gene. **(I)** Divergence ( $y$ -axis, residual of straight-line regression fit) between pseudobulk gene expression of single cell and single nucleus RNA-seq and gene length ( $x$ -axis) for each protein coding gene expressed in skin basal keratinocytes in both datasets.



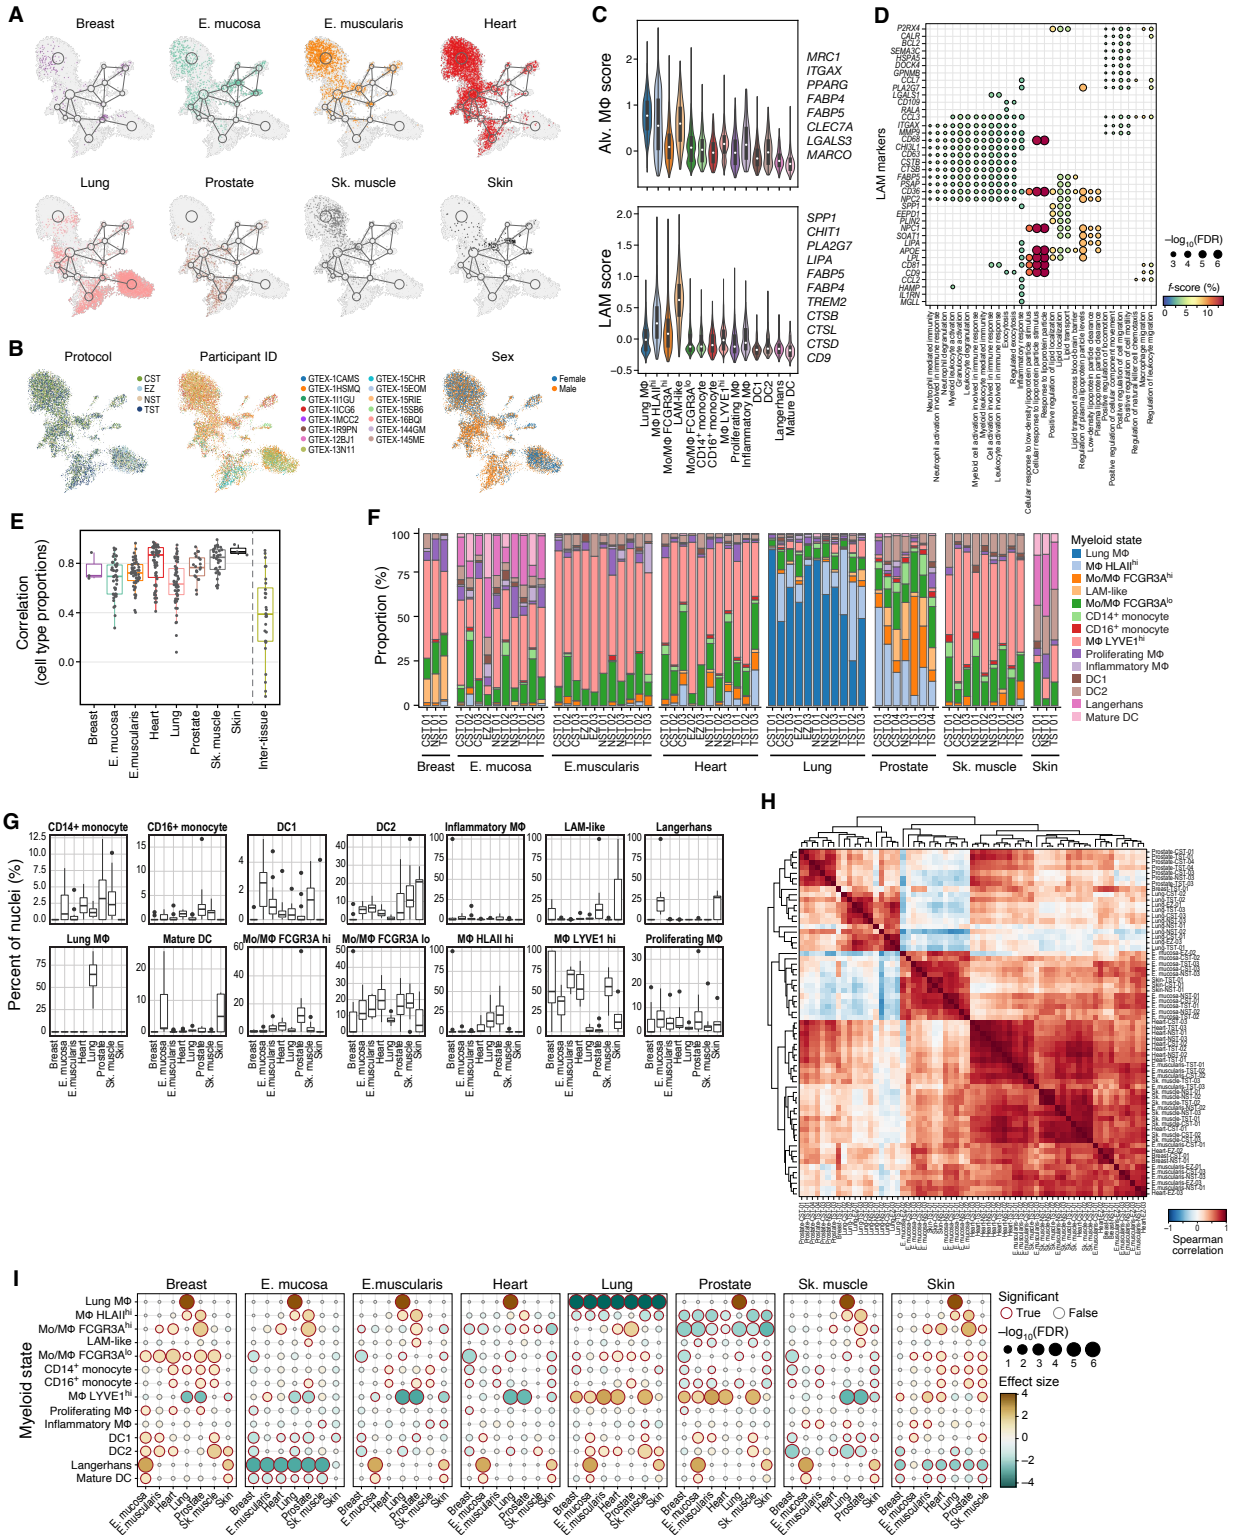

**Fig. S15. Cross-tissue analysis of myeloid cell subsets.** (A, B) Myeloid cell subsets across tissues. UMAP visualization of myeloid snRNA-seq profiles, highlighting cells from each tissue (A) or colored by protocol, donor, or sex (B). (C) Alveolar and lipid-associated macrophage signatures. Distribution of signature scores ( $y$ -axis) of alveolar macrophages (top) and lipid-associated macrophage (LAM) (bottom) for each myeloid cell subset ( $x$ -axis, (28)). Signature genes are listed on the right. (D) Functional enrichment of LAM markers. Significance ( $-\log_{10}(\text{FDR})$  circle size) of enrichment (F-score, circle color) of top 30 GO terms (rows) in LAM markers gene set (columns), showing LAM marker membership in each GO gene set. (E–I) Myeloid cell composition is similar in the same tissue and different between tissues. (E) Distribution of pairwise Spearman correlation coefficients ( $y$ -axis) of myeloid cell subset proportion profiles for samples within each tissue and between different tissues ( $x$ -axis). Box plots show median, quartiles, and whiskers at 1.5 IQR (interquartile range). (F) Proportion (%  $y$ -axis) of different myeloid subsets in each sample ( $x$ -axis). (G) Distribution of proportions ( $y$ -axis) for each broad cell type (columns) within each tissue ( $x$ -axis). Box plots show median, quartiles, and whiskers at 1.5 IQR (interquartile range). (H) Spearman correlation coefficient (color bar) of myeloid cell subset proportion profiles of each pair of samples (columns, rows). Rows and columns were hierarchically clustered using the Euclidean distance and complete linkage. (I) Differences in myeloid cell distributions across tissues. Significance (circle size,  $-\log_{10}(\text{FDR})$ ) and effect size (circle color) of the difference in proportion in each myeloid cell subset (rows) between each tissue (columns) relative to one reference tissue (label on top).



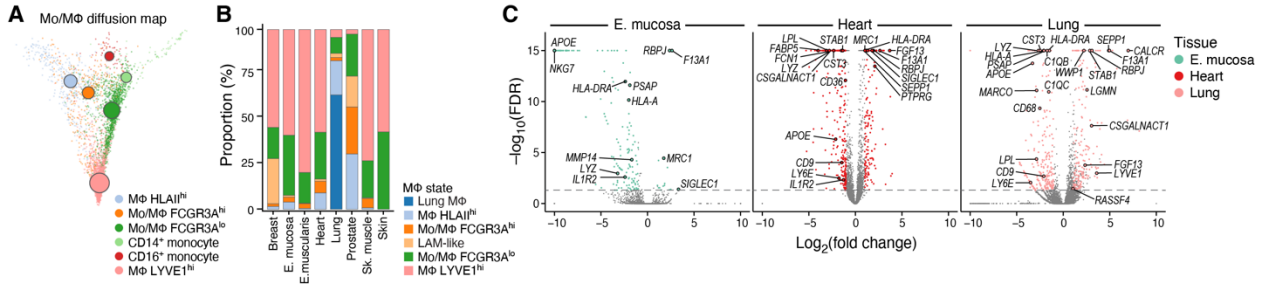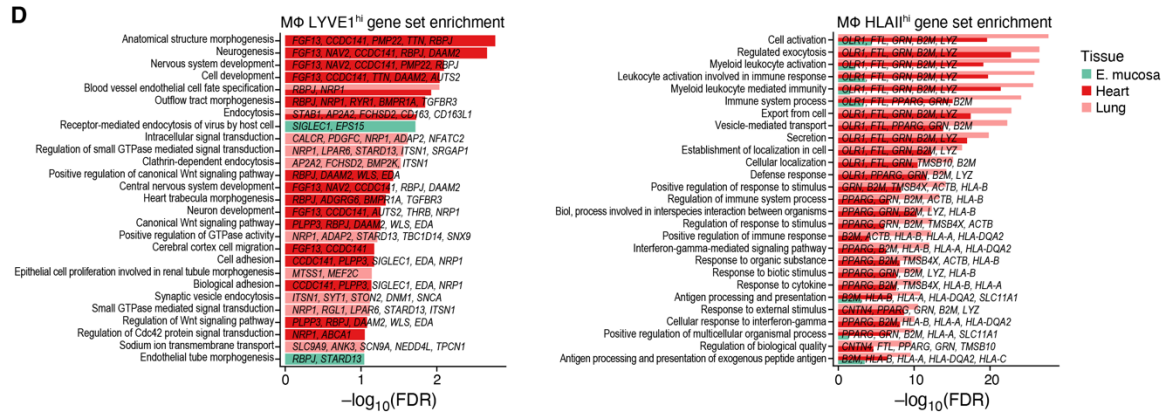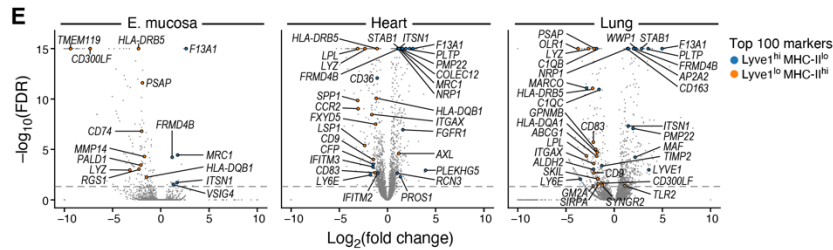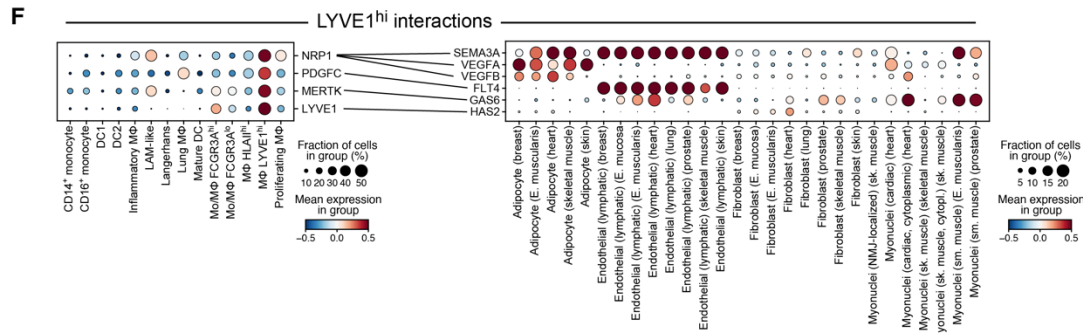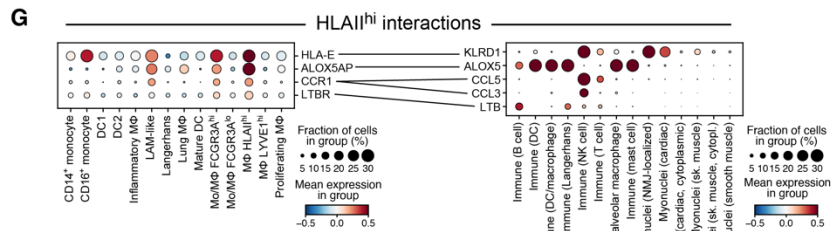

**Fig S16. Differential expression, functional enrichment, and receptor-ligand interactions of dichotomous macrophage states.** (A) Diffusion map of monocytes, macrophages, and transitional monocyte/macrophage subset (colors) profiles (dots) in heart. Large circles: Centroids of each state (sizes proportional to the population size). (B) Macrophage cell proportions across tissues. Proportion (% ,  $y$ -axis) of different macrophage subsets in each individual tissue ( $x$ -axis). (C-E) M $\phi$  *LYVE1*<sup>hi</sup> and M $\phi$  *HLAII*<sup>hi</sup> distinctive signatures. (C) Differential expression ( $x$ -axis,  $\log_2(\text{Fold change})$ ,  $x < 0$ : enriched in M $\phi$  *HLAII*<sup>hi</sup>;  $x > 0$ : enriched in M $\phi$  *LYVE1*<sup>hi</sup>) and its significance ( $-\log_{10}(\text{FDR (Benjamini-Hochberg)})$ , Wald test) between M $\phi$  *LYVE1*<sup>hi</sup> and M $\phi$  *HLAII*<sup>hi</sup> profiles in the three tissues where both populations are observed. (D) Significance of enrichment ( $x$ -axis,  $-\log_{10}(\text{Benjamini-Hochberg FDR})$ , Fisher's exact test) of GO gene sets ( $y$ -axis) in genes differentially expressed between M $\phi$  *LYVE1*<sup>hi</sup> and M $\phi$  *HLAII*<sup>hi</sup> populations in the three tissues in B. (E) Differential expression plots as in (C) with marker genes of mouse *Lyve1*<sup>hi</sup>MHCII<sup>lo</sup> and *Lyve1*<sup>lo</sup>MHCII<sup>hi</sup> cells (47) highlighted. (F-G) Putative receptor-ligand interactions between dichotomous M $\phi$  states and cells of broad cell types. Scaled mean expression ( $z$ -score, circle color) and fraction of expressing cells (circle size) of receptor or ligand genes highly expressed by M $\phi$  *LYVE1*<sup>hi</sup> (F, left), broad cell types that are potentially interacting with M $\phi$  *LYVE1*<sup>hi</sup> (F, right), M $\phi$  *HLAII*<sup>hi</sup> (G, left) and broad cell types that are potentially interacting with M $\phi$  *HLAII*<sup>hi</sup> (G, right), (columns, labels at bottom). Lines between the genes show potential cell-cell interactions.

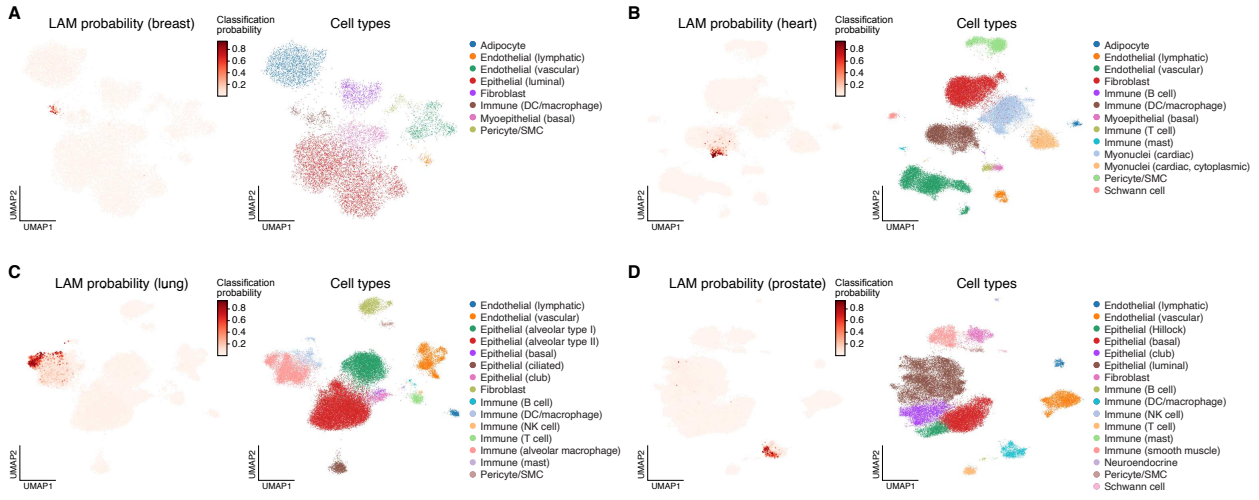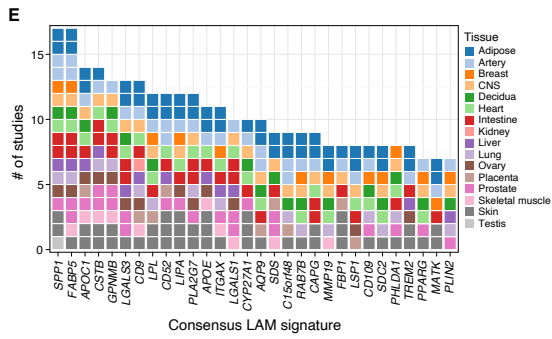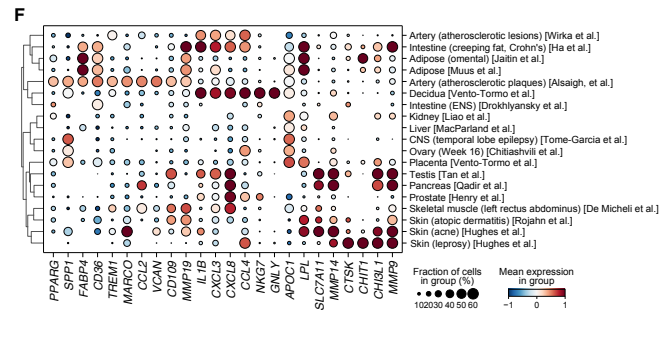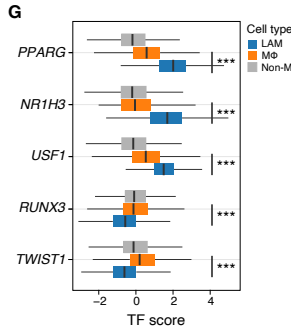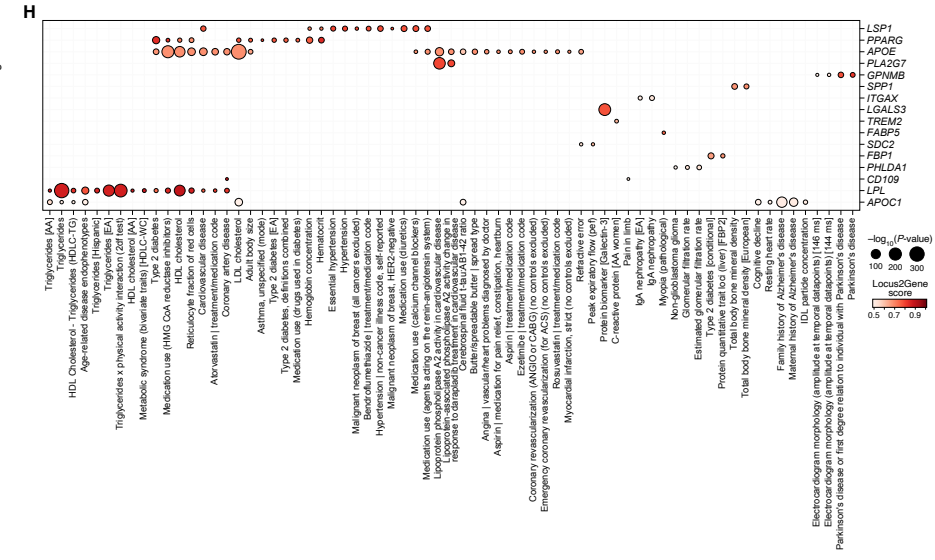

**Fig. S17. Tissue distribution and GWAS associations of LAM-like cells.** (A–D) LAM-like cells across tissues. UMAP visualization of nuclei profiles from breast (A), heart (B), lung (C) and prostate (D) (where LAM-like profiles are detected), colored by classification probabilities of LAMs (left) or by broad cell type annotations (right). (E) Consensus LAM signature. The number of published studies ( $y$ -axis) and tissue type (color) in which each LAM marker gene ( $x$ -axis, (28)) is detected as a marker. (F) Variable genes across LAMs. Scaled mean expression ( $z$ -score, circle color) and fraction of expressing cells (circle size) of the genes (columns) variable across the scRNA-seq datasets (rows). (G) LAM-associated TFs. Distribution of activity scores ( $x$ -axis) of TFs ( $y$ -axis) that are significantly high in LAMs or non-LAM macrophages. \*\*\* =  $P < 10^{-20}$  ( $p$ -values in **Fig. 3J** are combined across studies using Fisher’s method). (H) LAM marker genes related to GWAS genes. LAM marker genes (rows) and GWAS (columns) where the genome-wide significant variants (dot size,  $-\log_{10}(P \text{ value})$  of the best variant) are associated with the marker genes with high score ( $> 0.5$ , Open Targets Genetics Locus-to-gene mapping, dot color).

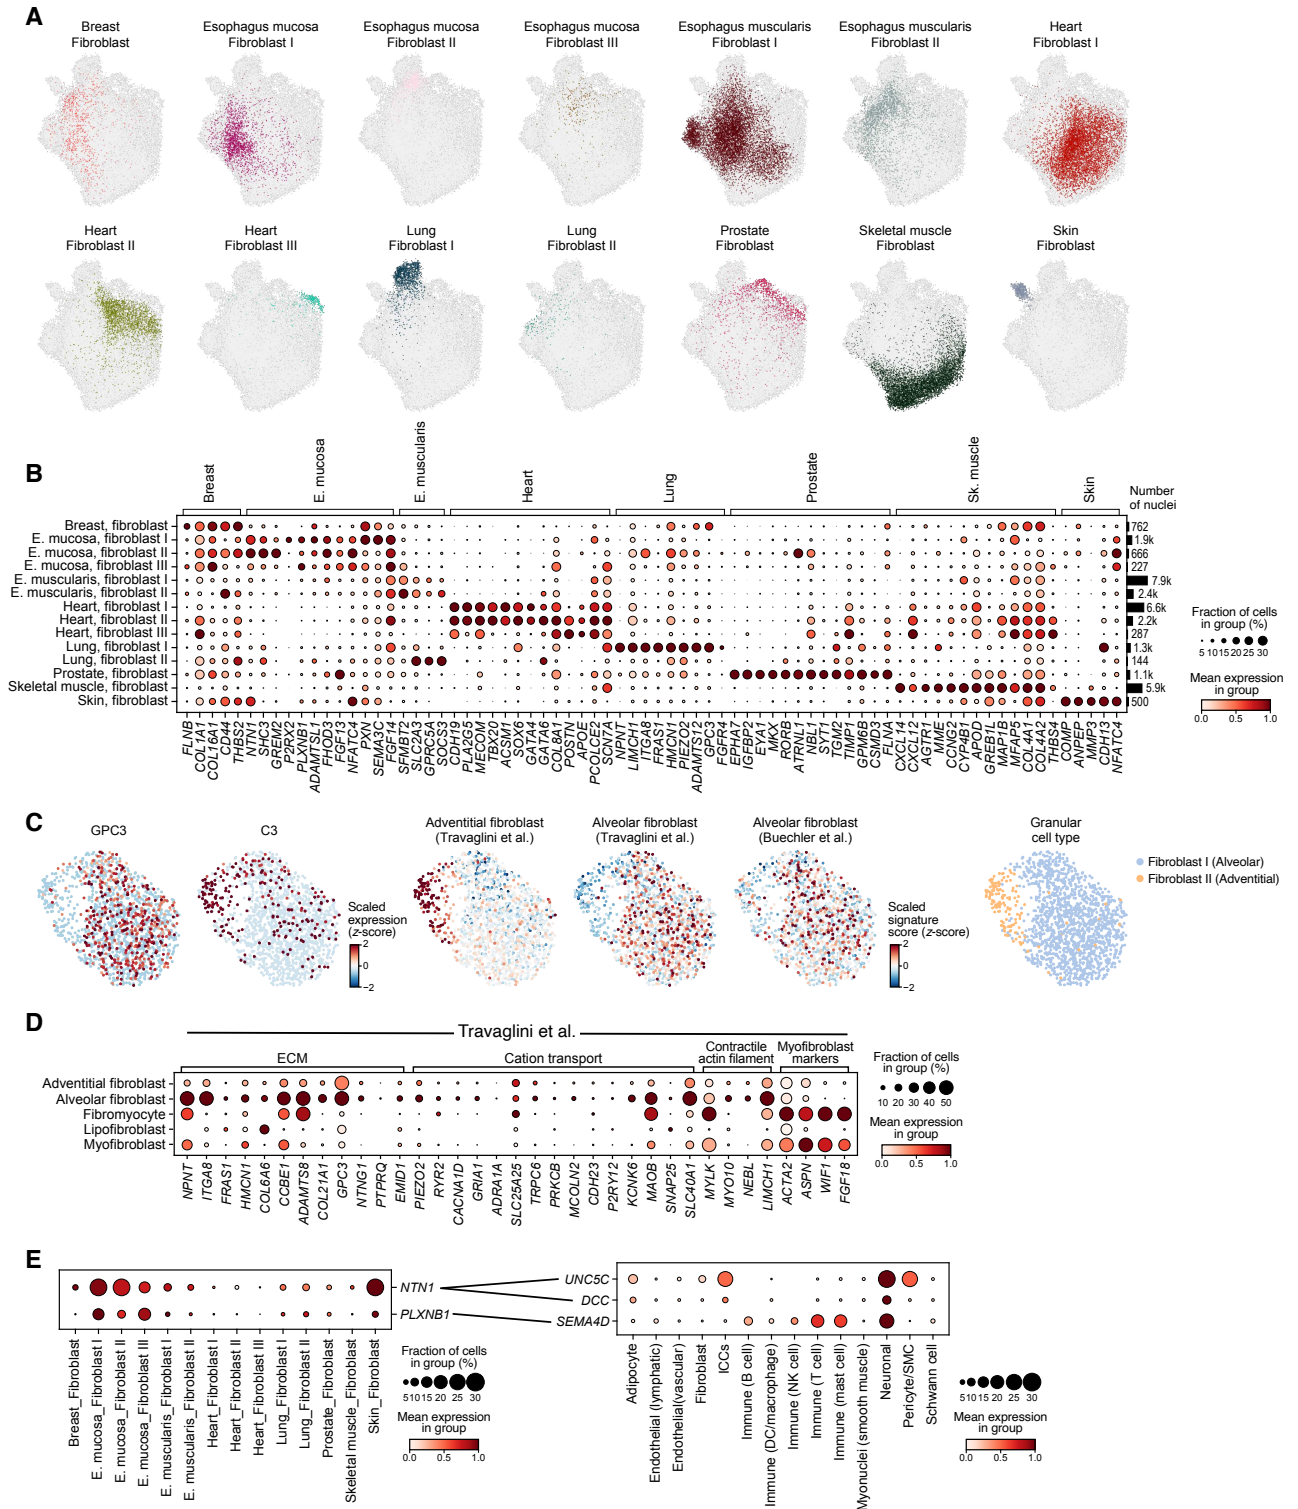

**Fig. S18. Tissue-specific fibroblast signatures.** (A) Fibroblast subsets across tissues. UMAP representation of fibroblasts profiles colored by granular fibroblast types in each tissue. (B) Tissue-enriched markers of fibroblasts across eight tissues. Min-max scaled mean expression ( $\log(\text{TP10K}+1)$ , circle color) and fraction of expressing cells (circle size) of marker genes (columns) associated with granular fibroblast annotations in each tissue subset (rows, and labels on top). (C-D) Distinct features of lung fibroblasts. (C) UMAP representation of lung fibroblast profiles colored by scaled ( $z$ -score) expression of individual genes or signatures of adventitial and alveolar fibroblasts (Travaglini et al. (40), Buechler et al. (108)), or granular lung fibroblast annotations. (D) Min-max scaled mean expression ( $\log(\text{TP10K}+1)$ , circle color) and fraction of expressing cells (circle size) of genes from ECM, cation transport, contractile actin filament pathways and myofibroblast markers (pathway labels at top) in granular fibroblast types (rows) in lung scRNA-seq (40). (E) Putative receptor-ligand interactions between fibroblasts in esophagus mucosa and neurons in esophagus muscularis. Mean expression (min-max scaled, circle color) and fraction of expressing cells (circle size) of receptor or ligand genes highly expressed by esophagus mucosa fibroblasts (E, left), and cognate receptor or ligand genes highly expressed by neurons in esophagus muscularis (E, right). Lines between the genes show potential cell-cell interactions.



Disease-associated gene loadings of OMIM topics

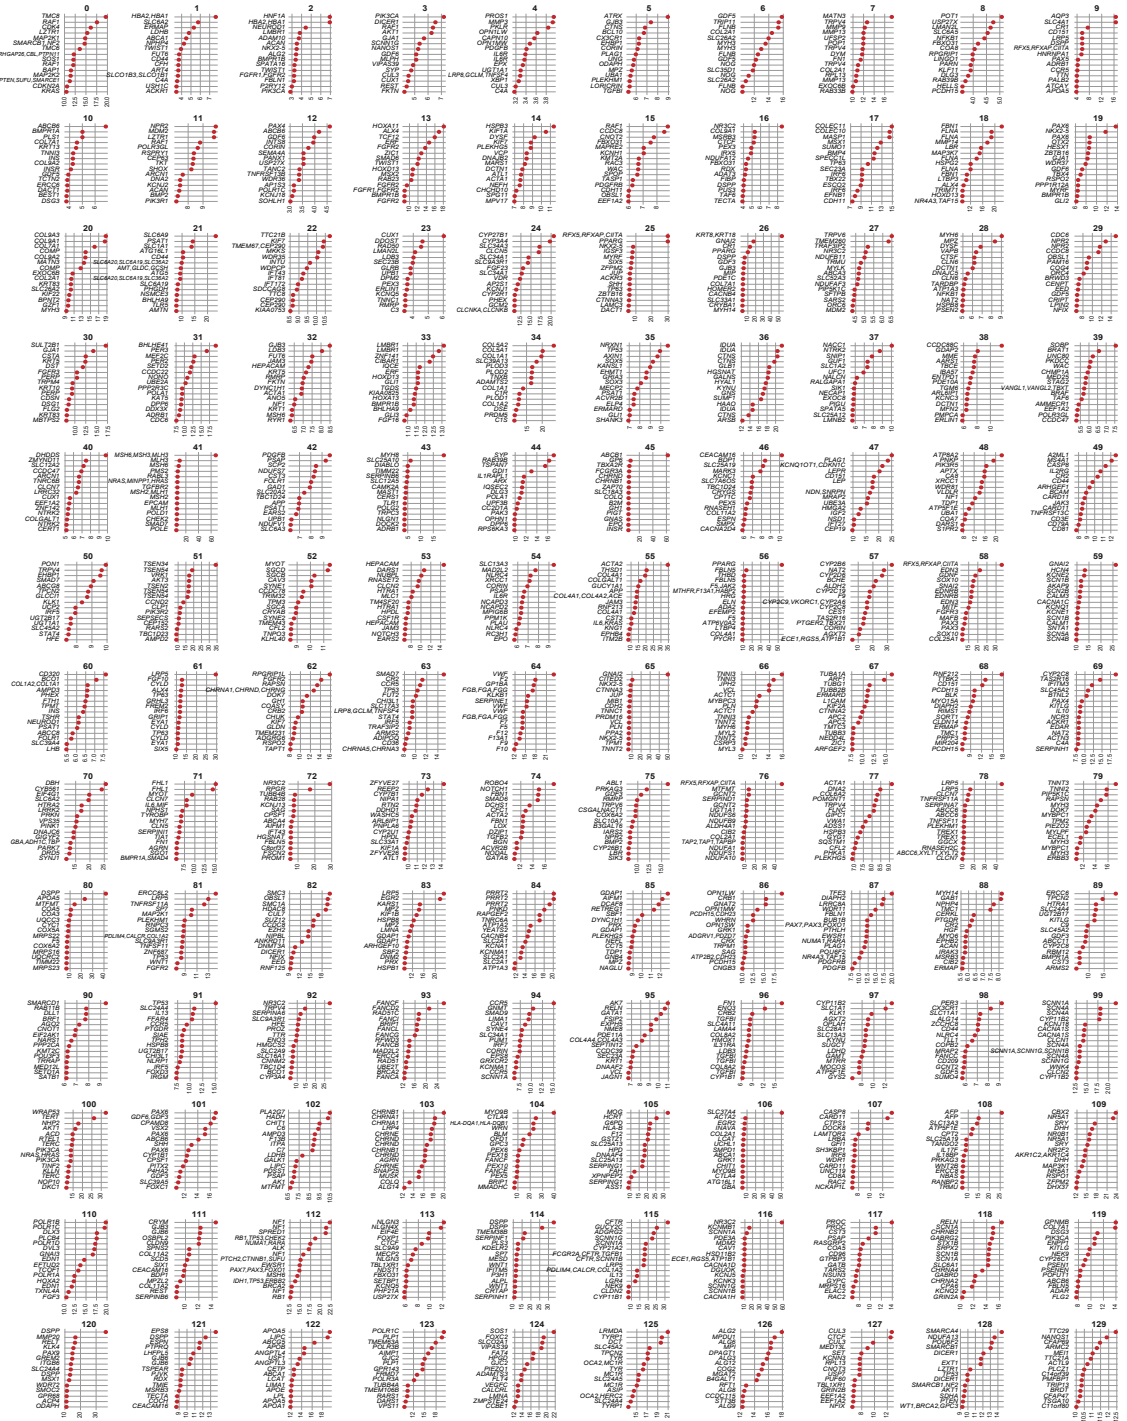

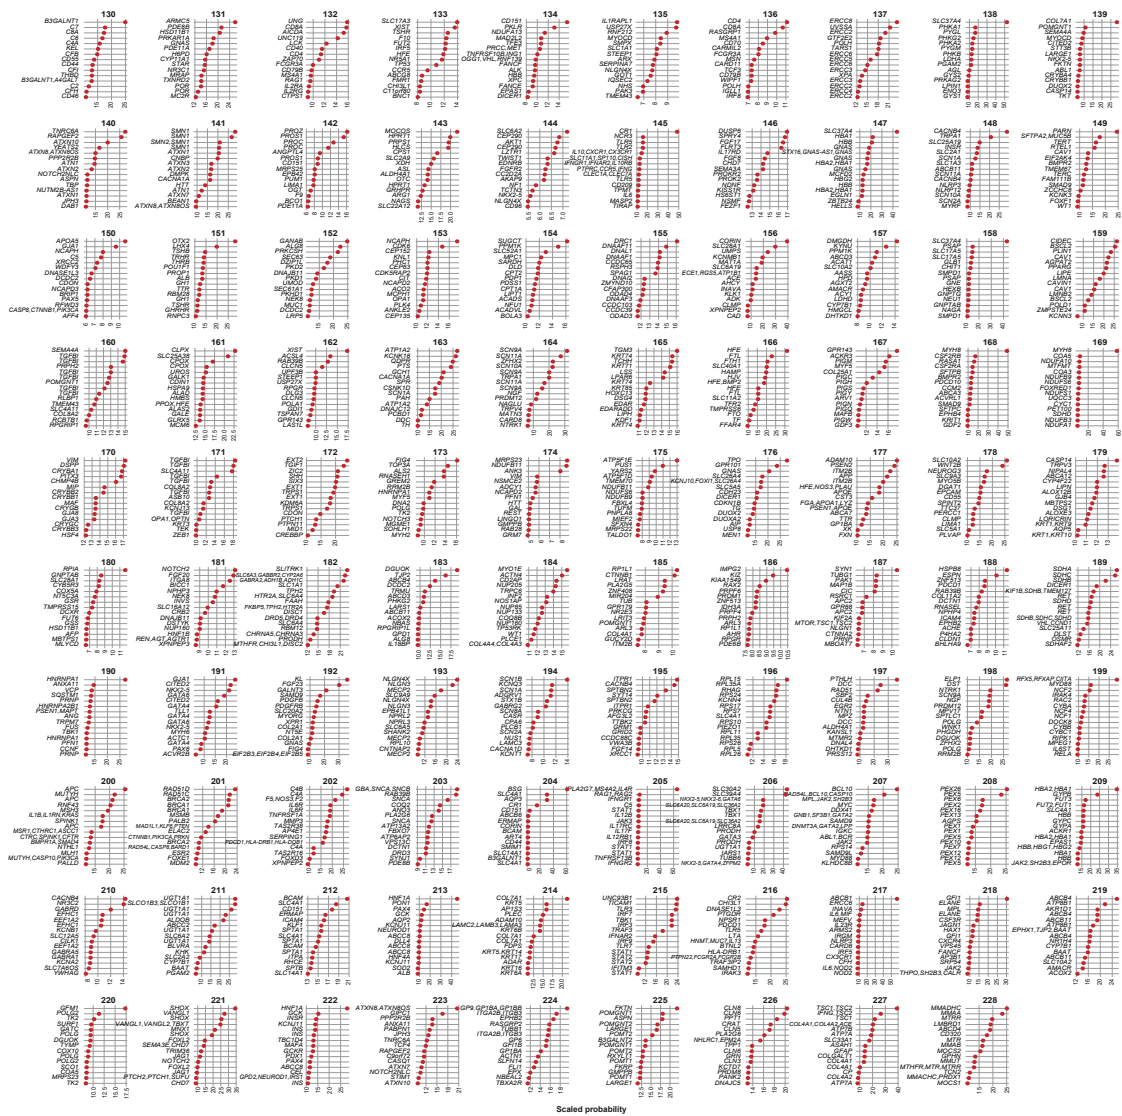

**Fig. S19. Relation of monogenic diseases to disease topics.** Scaled loadings ( $z$ -score,  $x$ -axis) of top 15 diseases (rows) with the genes associated for each of the topics. Genes of the diseases with multiple gene associations are given as a comma-separated list.



Word loadings of OMM topics

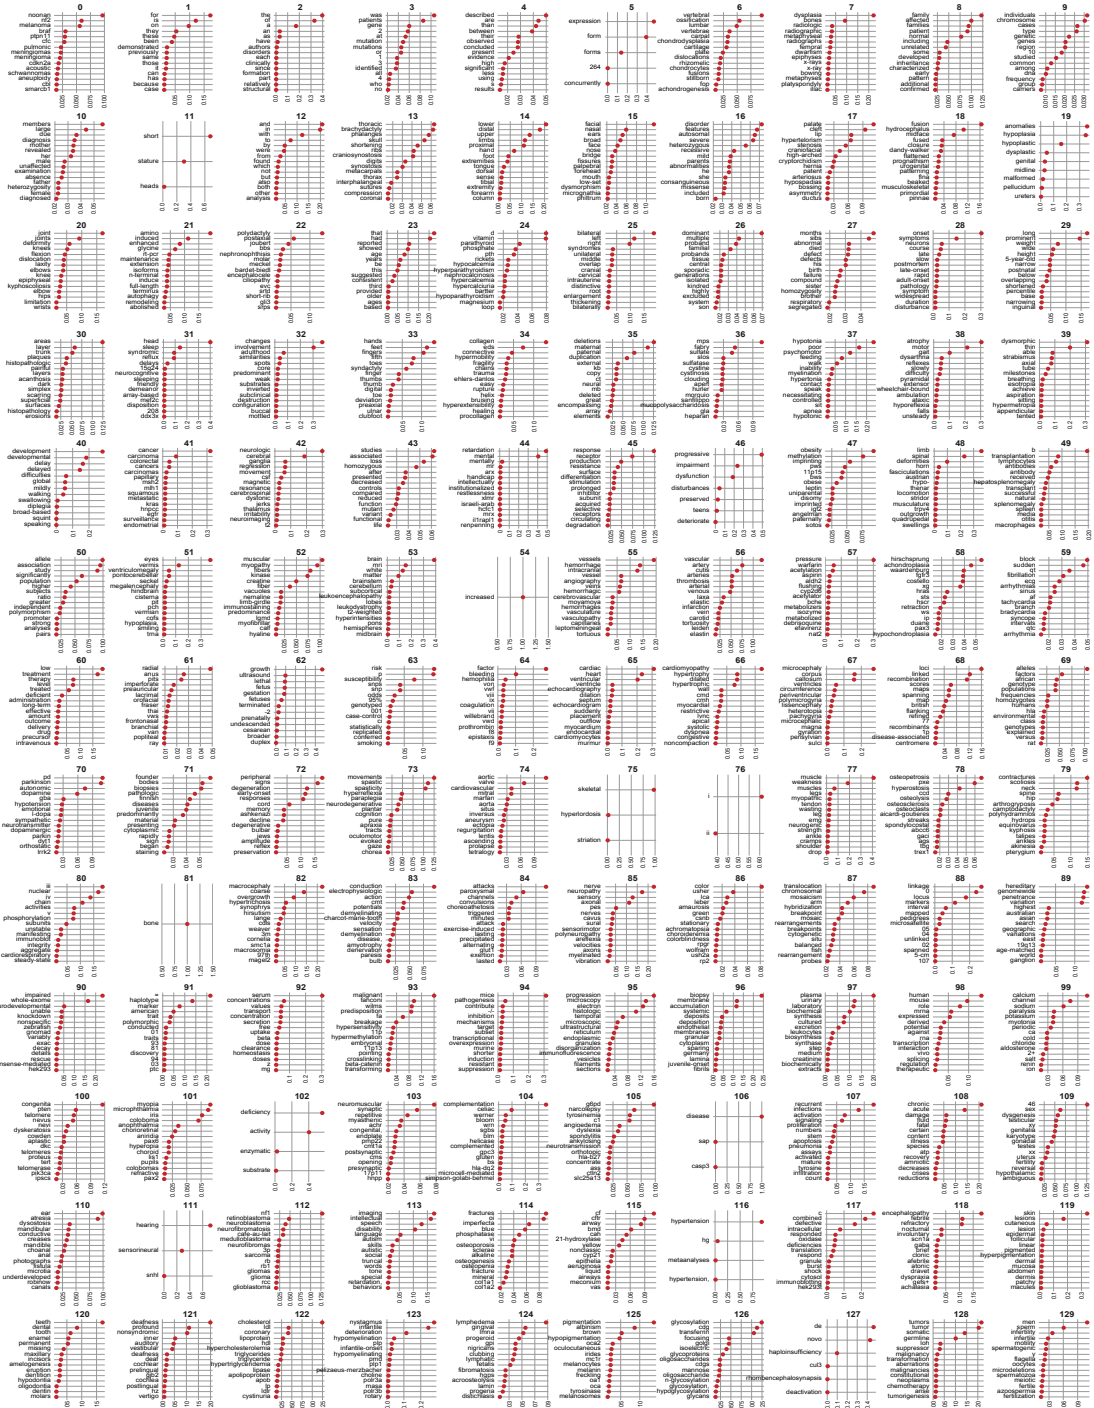

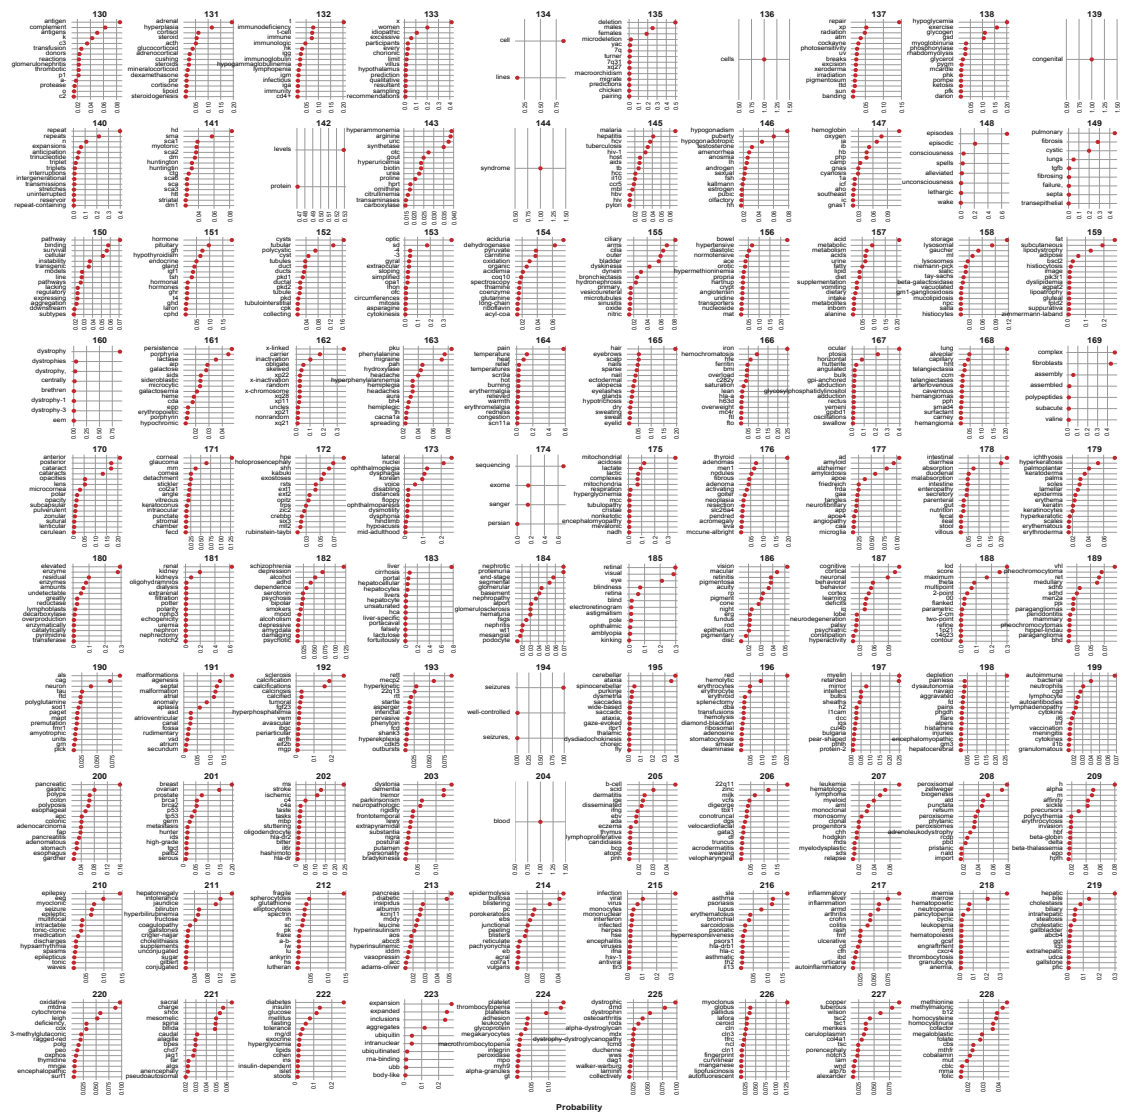

**Fig. S20. Loadings of words for each monogenic disease topic. Probabilities (x-axis) of top 15 words (rows) for each of the monogenic disease topics.**

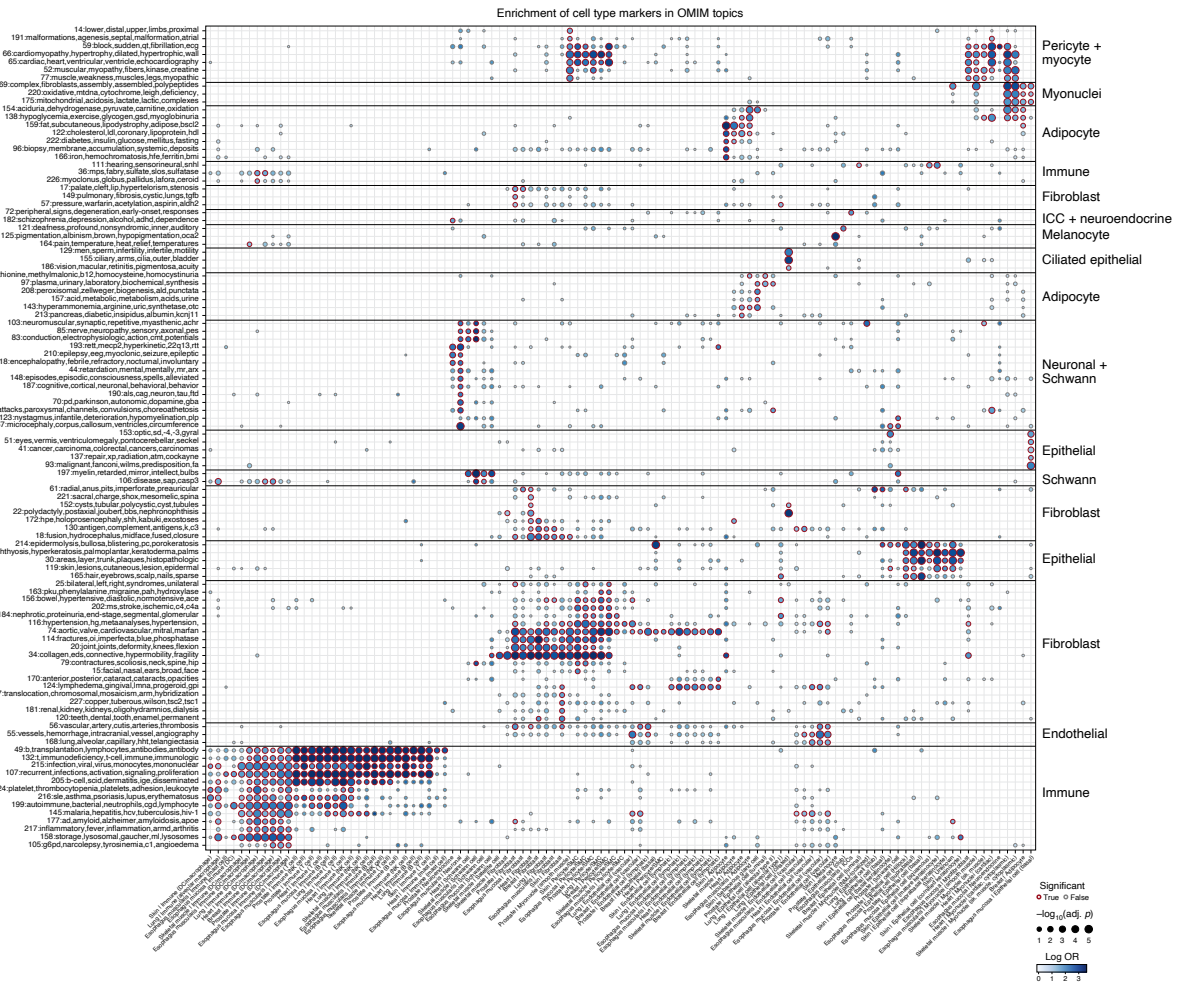

**Fig. S21. Enrichment of cell type markers in OMIM topics.** Enrichment of broad cell type markers with monogenic disease gene sets inferred by topic modeling (28). Effect size (log odds ratio, dot color) and significance ( $-\log_{10}(\text{Benjamini-Hochberg FDR})$ , dot size) of enrichment of genes from each monogenic disease topic (rows) for cell type markers of broad cell subsets (columns) in each tissue. Rows and columns are hierarchically clustered using the Pearson correlation metric and complete linkage method. Topic names are given as an integer identifier and comma-separated five words with highest loadings. Major topic groups inferred by hierarchical clustering are labeled with cell types associated with topics (rows, labels on right).

**Fig. S22. Expression of monogenic disease genes with high loadings in selected topics. Min-max scaled mean expression (log(TP10K+1), circle color) and fraction of expressing cells (circle size) of the genes with high loadings in the selected topics (shown in Fig. 5A, columns, labels at bottom, topic labels at top) in broad cell types (rows) in all tissues.**

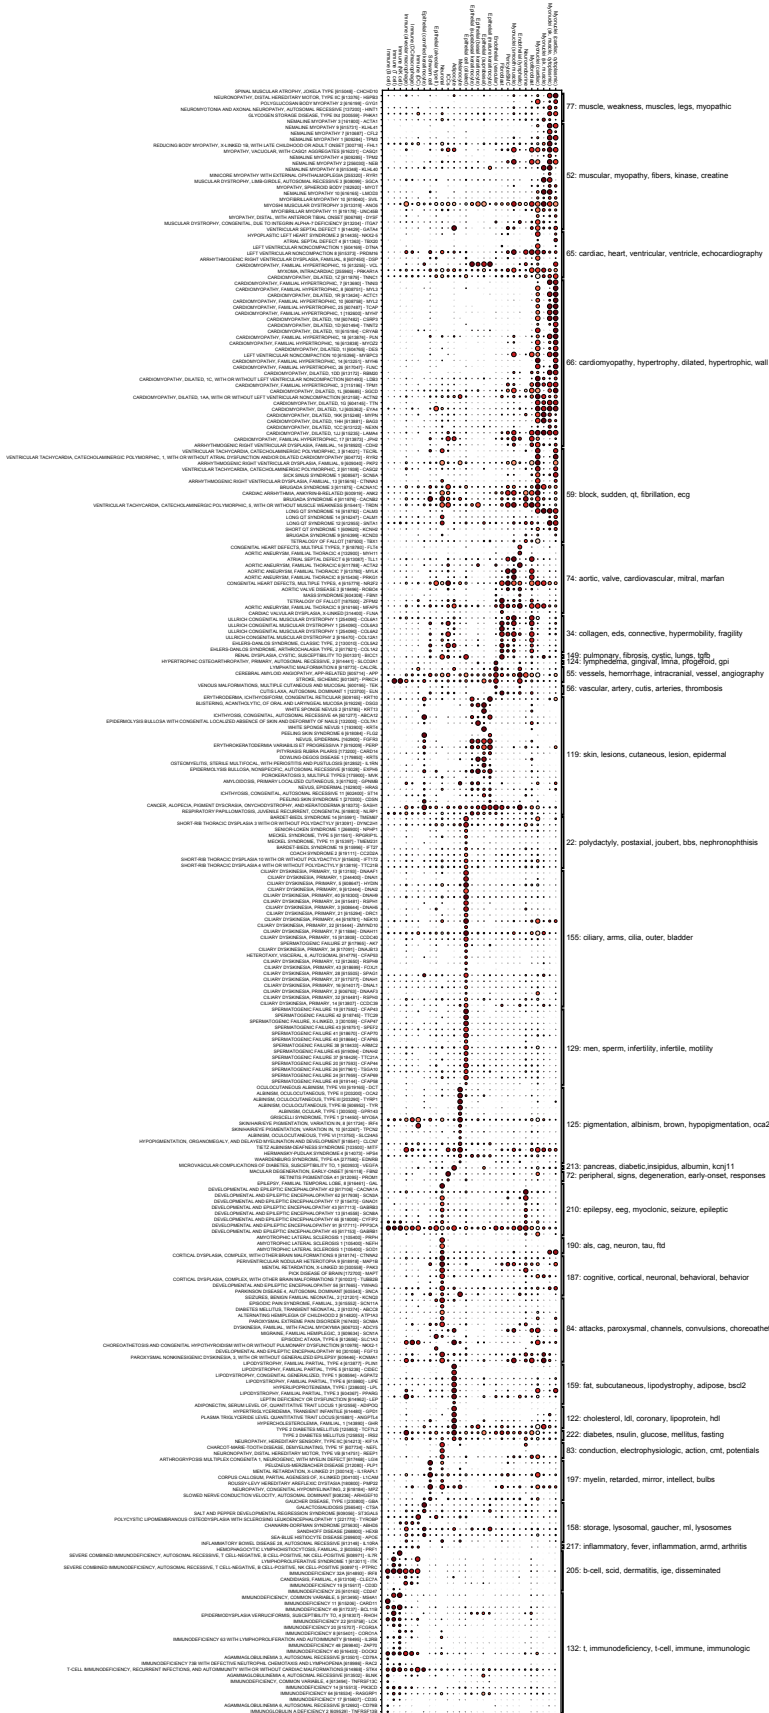



A

Topic 222: diabetes and lipodystrophy

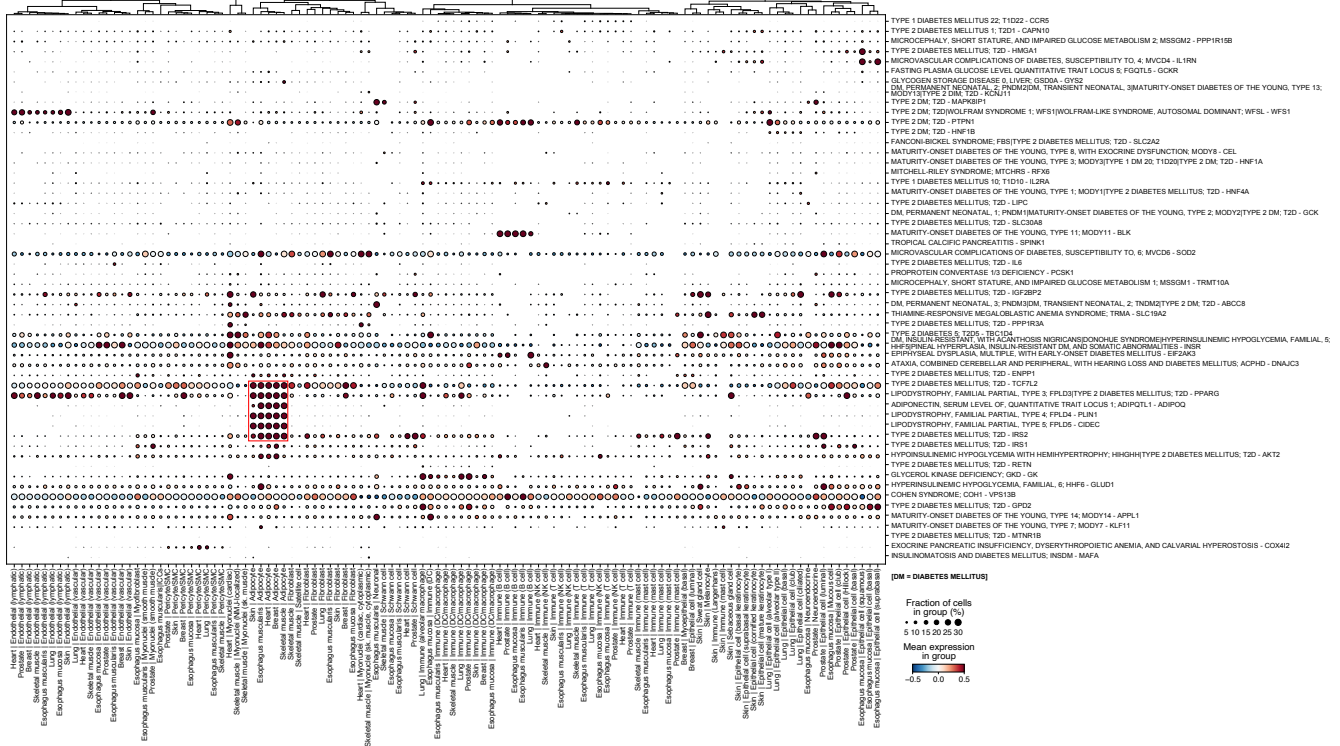

B

Topic 129: spermatogenic failure

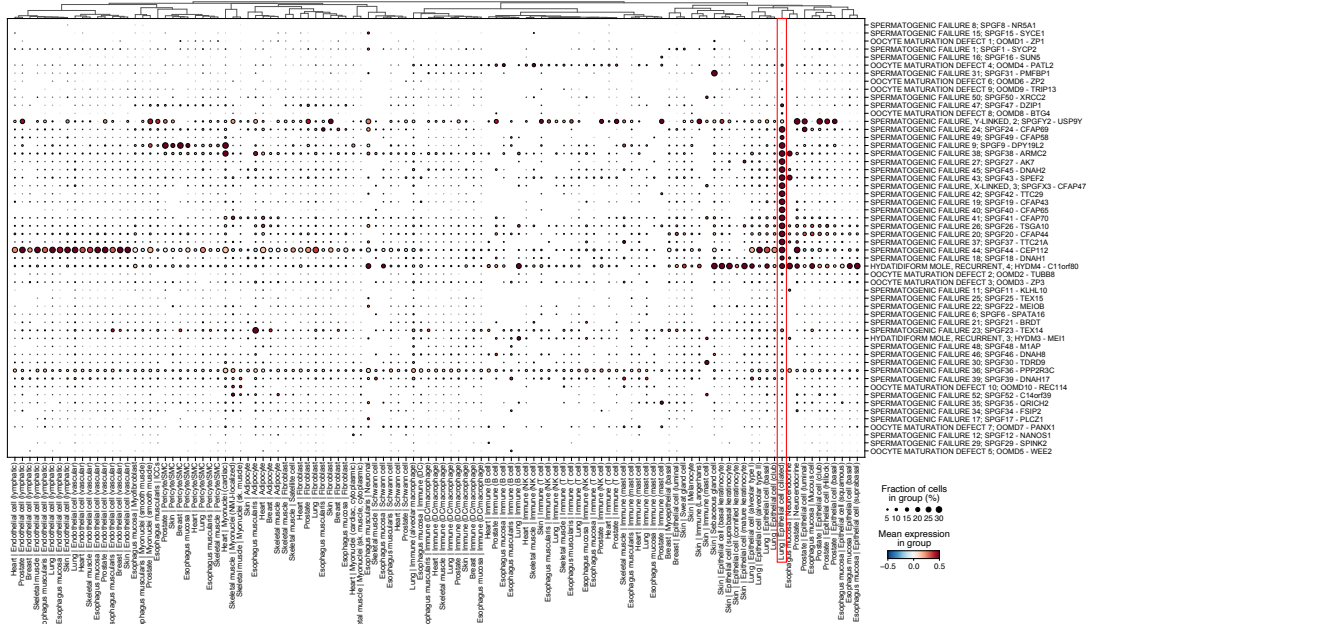



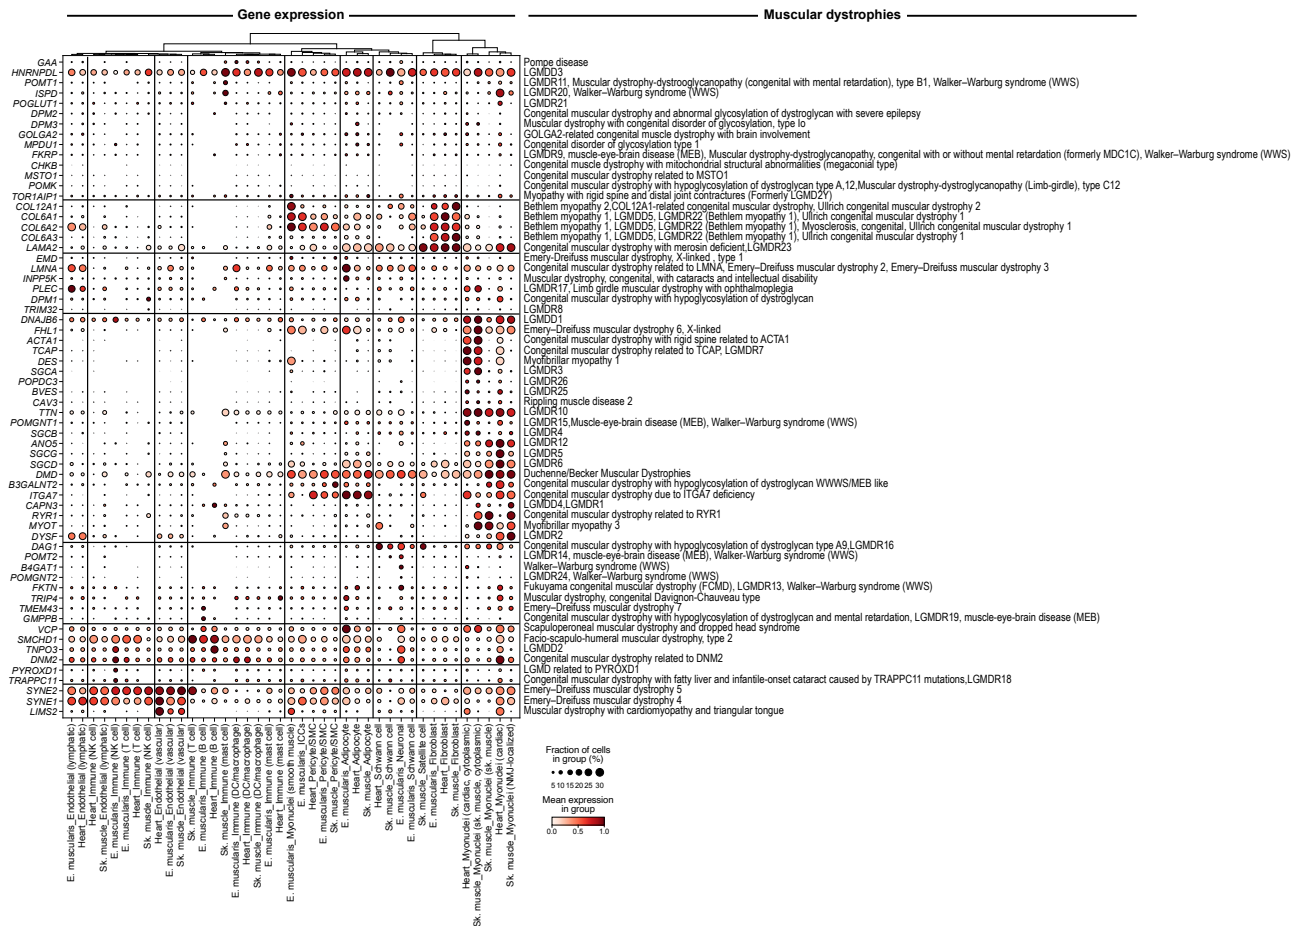

**Fig. S24. Expression of genes that are causal for muscular dystrophies in three muscle types.** Scaled mean expression (dot color, min-max scale) and fraction of expressing cells (dot size) for muscular dystrophy genes (rows, gene labels on left, disease names on right) in each broad cell type in esophagus muscularis, heart and skeletal muscle (columns, labels at bottom). Major gene and cell type groups identified by hierarchical clustering (Pearson correlation metric with Ward and average linkages for cell types and genes, respectively) are split with black bars.

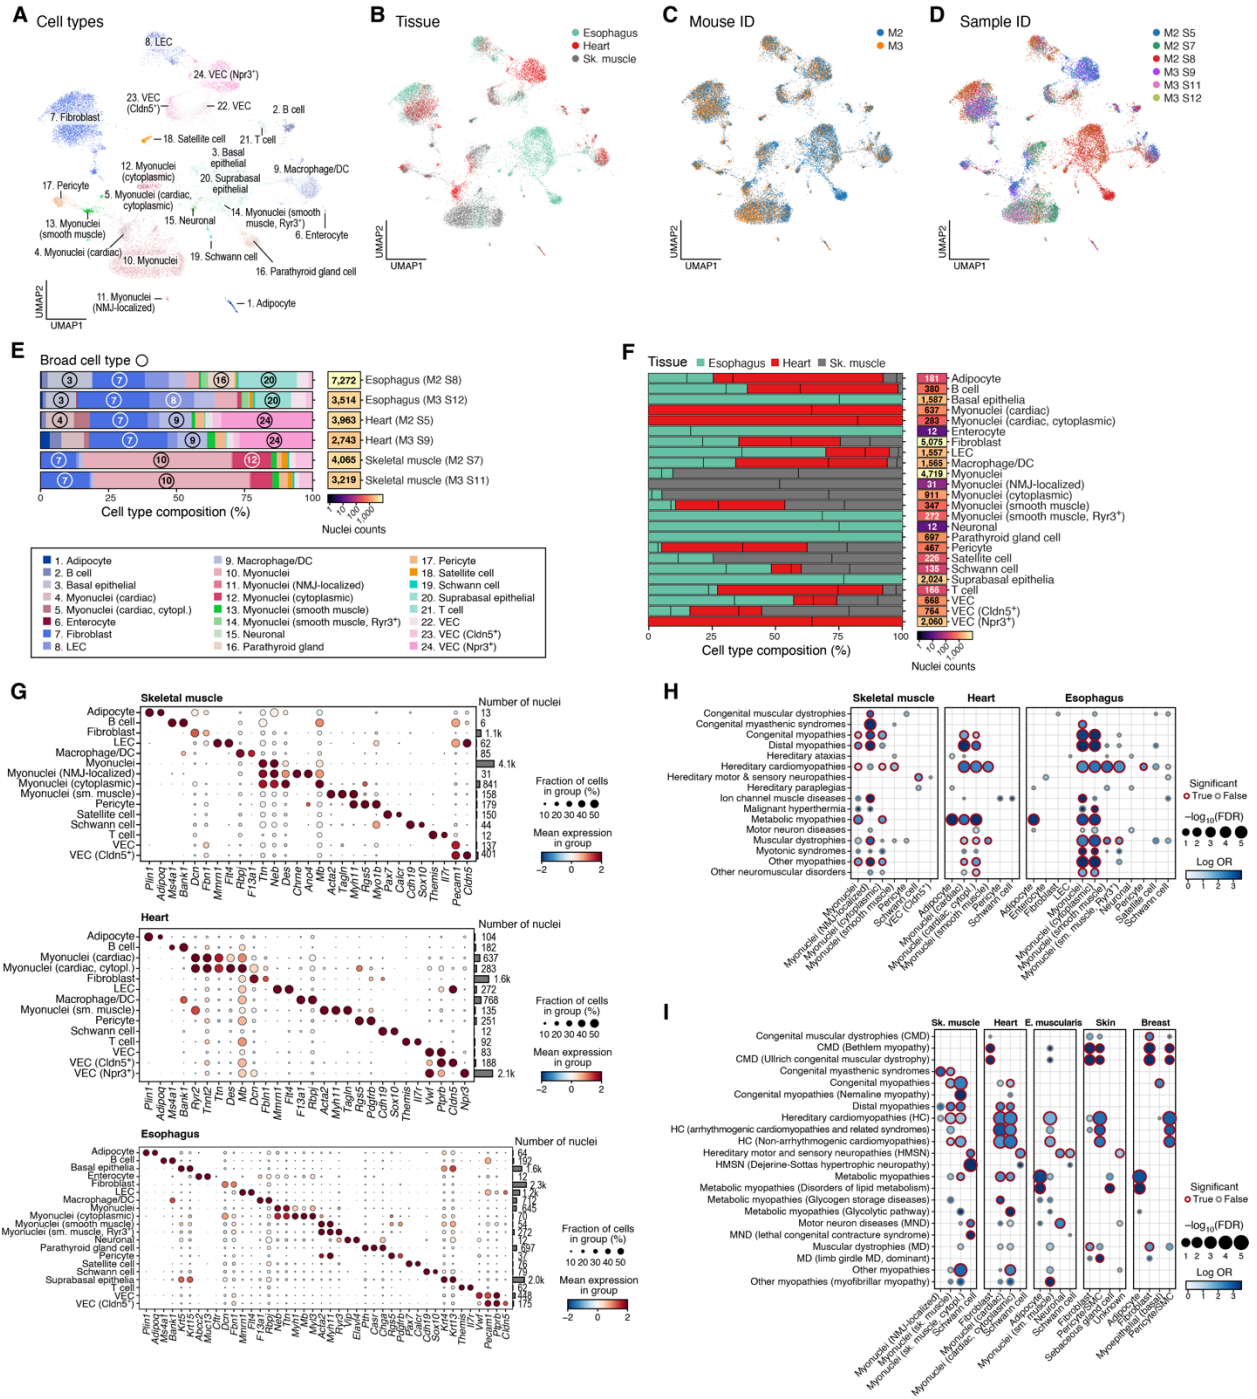

**Fig. S25. Analysis of monogenic muscle disease genes in mouse muscle tissues. (A–D)** Mouse muscle tissue atlas. UMAP visualization of snRNA-seq profiles from skeletal muscle, heart, and esophagus in mouse, colored by cell type (A), tissue (B), mouse (C) or sample IDs (D). (E, F) Mouse muscle atlas cell type composition. Proportion of nuclei ( $x$ -axis) of each type (color) in



each tissue (sample) (**E**), and of each tissue in each cell type (**F**, after normalizing for the total number of nuclei profiled in each tissue, (28)) along with the number of profiled nuclei (right). Circled numbers refer to cell types in the color legend. Black vertical lines in bars in **F**: relative proportion from each mouse. (**G**) Cell type markers. Scaled mean expression (dot color, z-score) and fraction of expressing cells (dot size) for marker genes (columns) in each cell subset (rows). (**H, I**) Enrichment of broad cell type markers with monogenic muscle disease genes. Effect size (log odds ratio, dot color) and significance ( $-\log_{10}(\text{Benjamini-Hochberg FDR})$ , dot size) of enrichment of mouse orthologs (28) of genes from each monogenic muscle disease group (rows) for (**H**) cell type markers of broad cell subsets (columns) in each mouse tissue (**I**) or from human muscle tissues (as in **Fig. 5B**) as well as skin and breast. Red border: Benjamini-Hochberg FDR < 0.1.

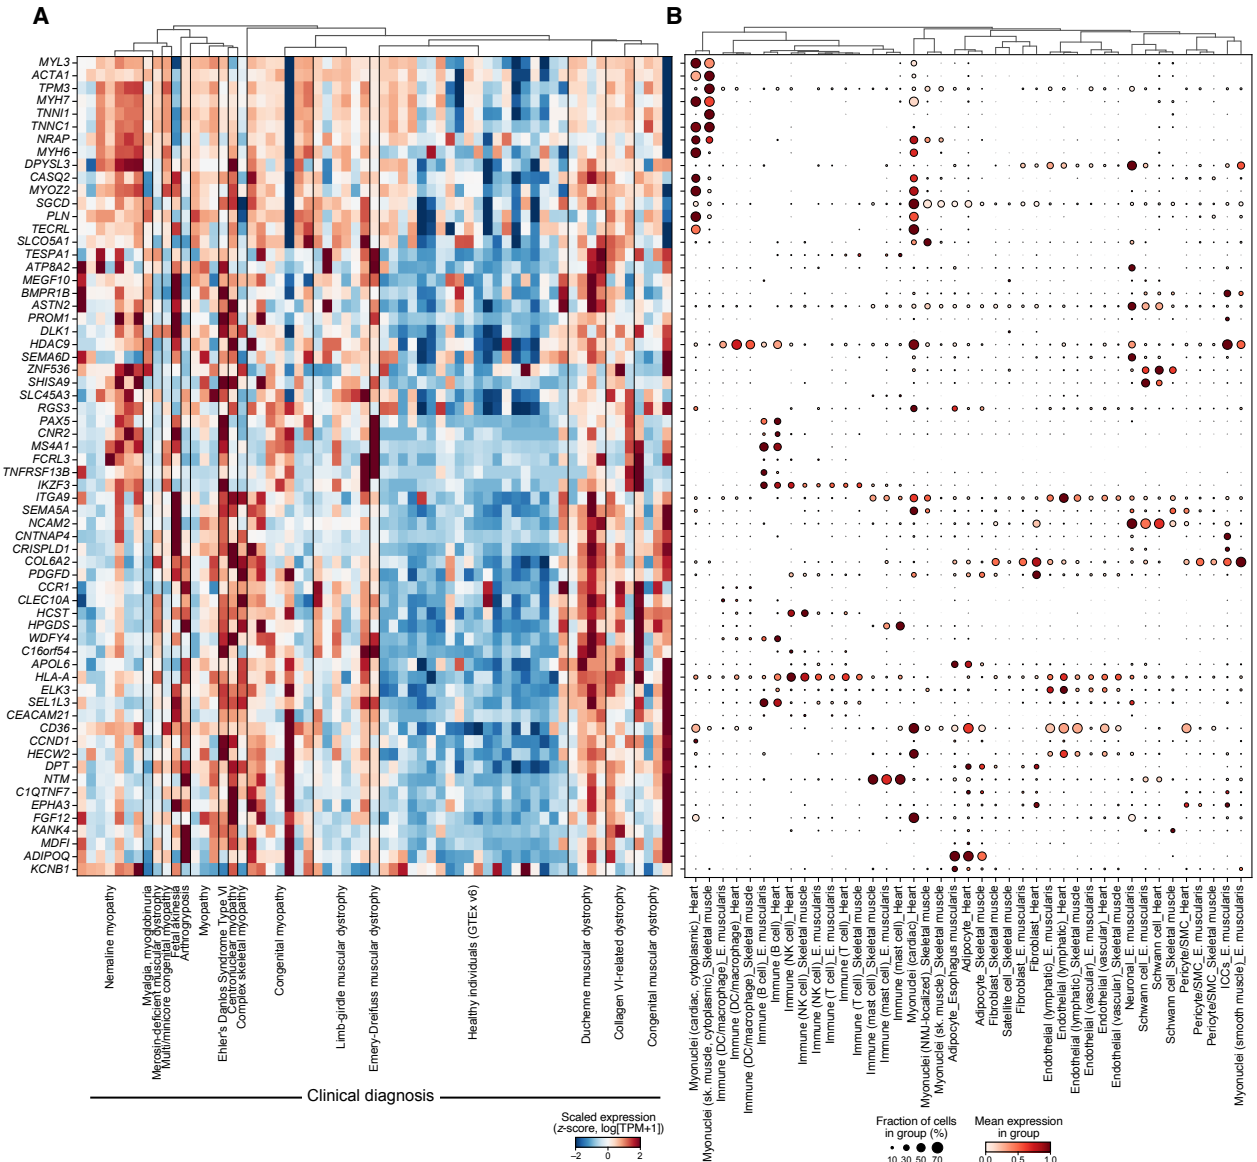

**Fig. S26. Single nucleus expression of genes differentially expressed between muscle samples from healthy individuals and muscle disease patients.** Scaled mean expression of genes (rows) differentially expressed between muscle samples from healthy individuals (GTEx v6, (140)) and muscle disease patients (122) in bulk RNA-seq (columns: individuals grouped and colored by clinical diagnosis, (28)) **(A)** and snRNA-seq (columns: broad cell types) in esophagus muscularis, heart and skeletal muscle **(B)**. Expression is z-score normalized ( $\log(\text{TPM}+1)$ ) in bulk RNA-seq,

min-max scaled ( $\log(\text{TP10K}+1)$ ) in snRNA-seq. Dot size and color represent mean snRNA-seq expression and the fraction of expressing nuclei in each group in (B).

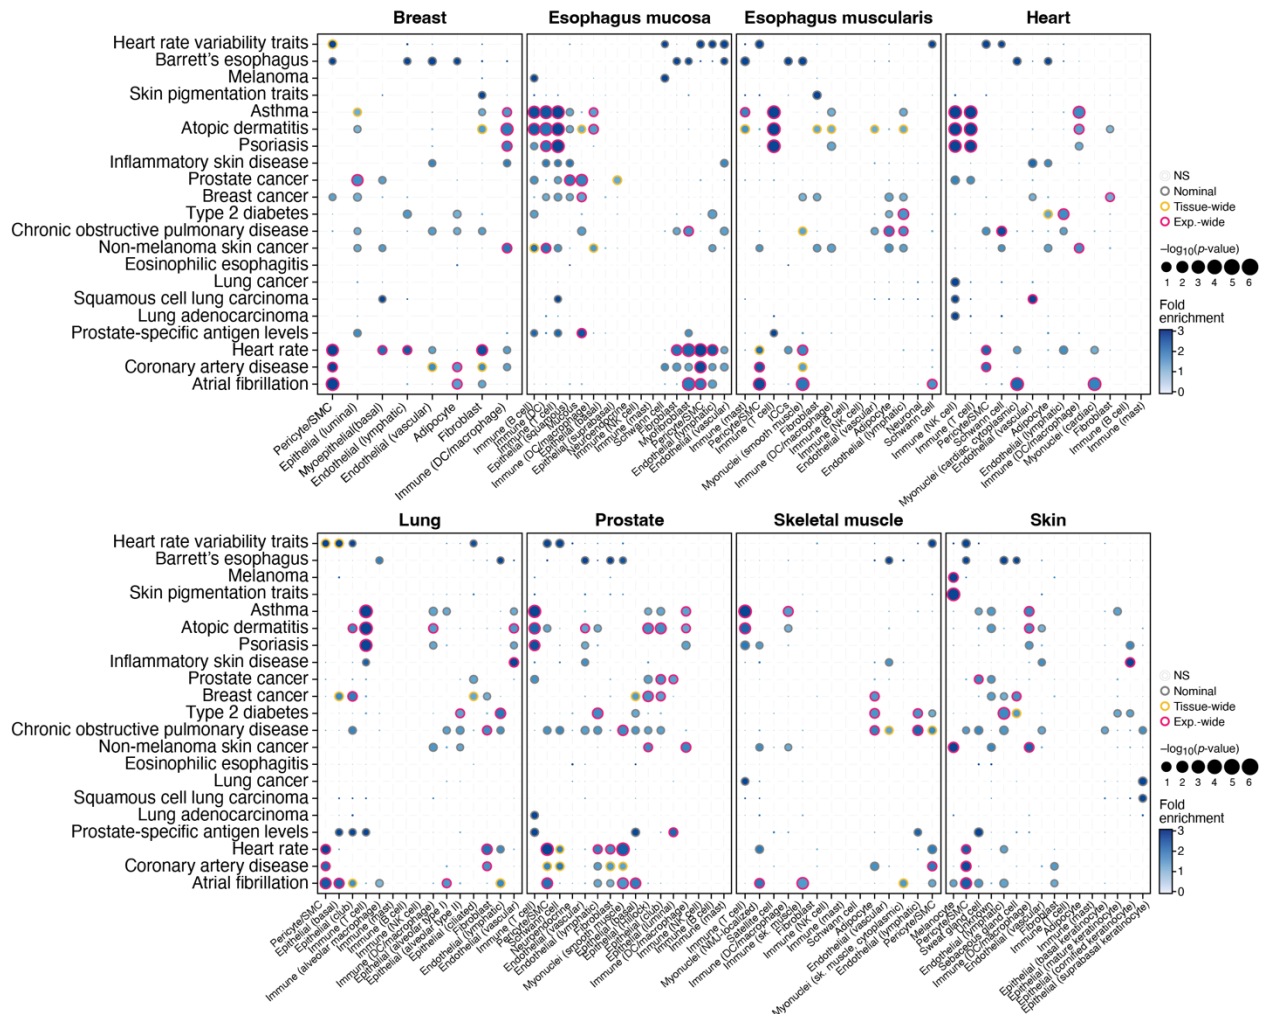

**Fig. S27. Cell type enrichment of GWAS loci from 21 complex traits in 8 tissues using broad cell type annotations.** Significance (circle size,  $-\log_{10}(p\text{-value})$ ) and effect size (circle color, fold-enrichment) of enrichment of GWAS locus sets of complex traits (rows) in each broad cell type category (columns) in the eight tissues in the cross-tissue atlas (panels). Grey, orange, red borders: nominal, tissue-wide (Benjamini–Hochberg (BH) FDR  $< 0.05$  correcting for all cell types tested per tissue and per trait) and experiment-wide (BH FDR  $< 0.05$  correcting for all cell types tested across 8 tissues and 21 traits) significance results, respectively.

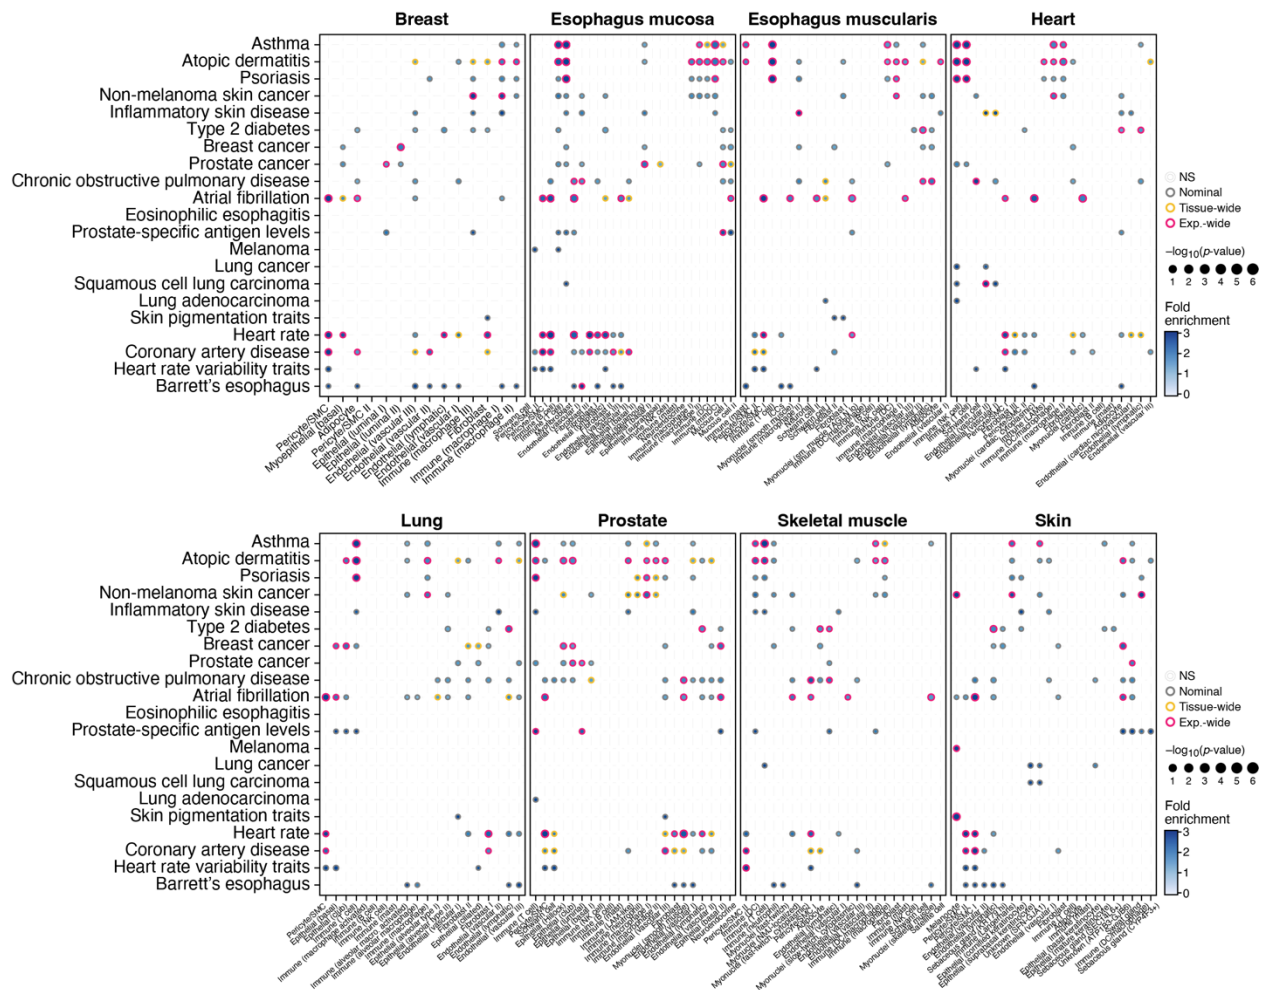

**Fig. S28. Cell type enrichment of GWAS loci from 21 complex traits in 8 tissues using granular cell type annotations.** Significance (circle size,  $-\log_{10}(p\text{-value})$ ) and effect size (circle color, fold-enrichment) of enrichment of GWAS locus set (rows) in each granular cell type category (columns) in the eight tissues in the cross-tissue atlas (panels). Grey, orange, red borders: nominal, tissue-wide (Benjamini–Hochberg (BH) FDR  $< 0.05$  correcting for all cell types tested per tissue and trait) and experiment-wide (BH FDR  $< 0.05$  correcting for all cell types tested across 8 tissues and 21 traits) significance results.

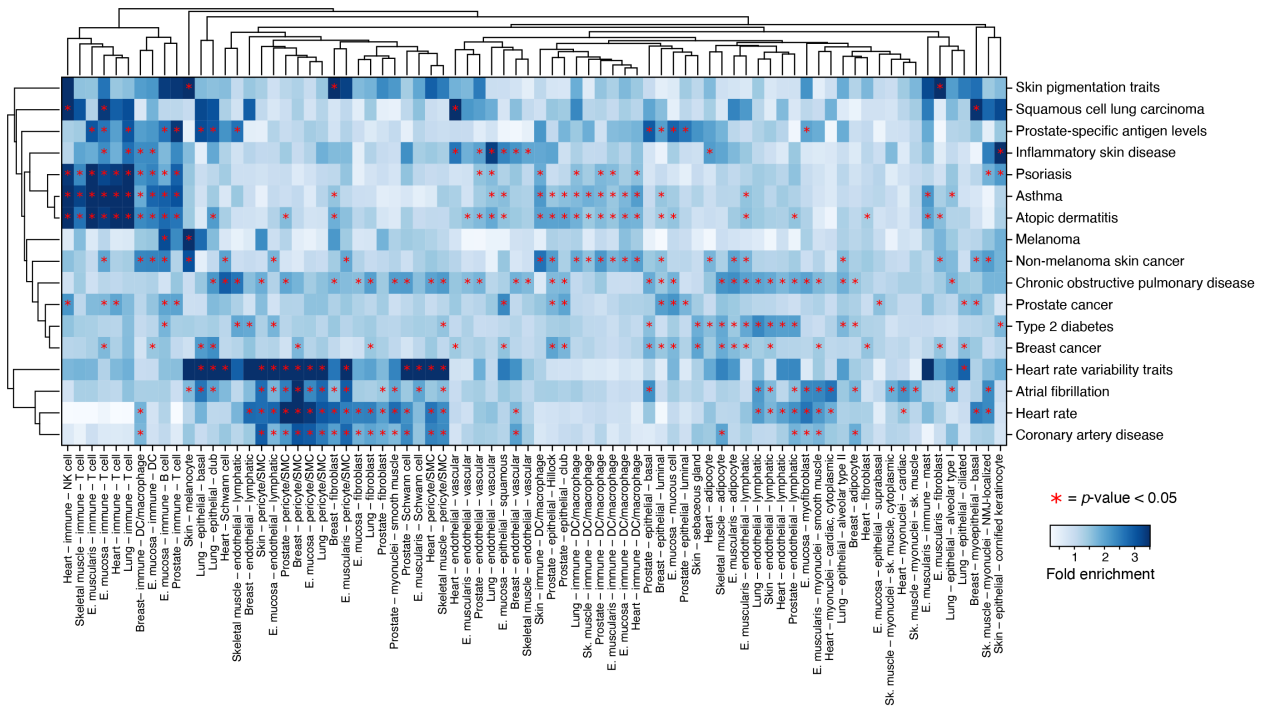

**Fig. S29. Cell type specificity enrichment of 21 complex traits across broad cell types from 8 tissues.** Fold-enrichment (color bar) of each GWAS locus set (rows) for specificity in each broad cell type category (columns). Red stars: nominal significance ( $P < 0.05$ ). Only traits with at least one enrichment at tissue-wide significance (BH FDR  $< 0.05$  correcting for number of cell types tested per tissue per trait) are shown. Rows and columns are hierarchically clustered using the Euclidean distance and average linkage method. Red stars denote nominal significance.

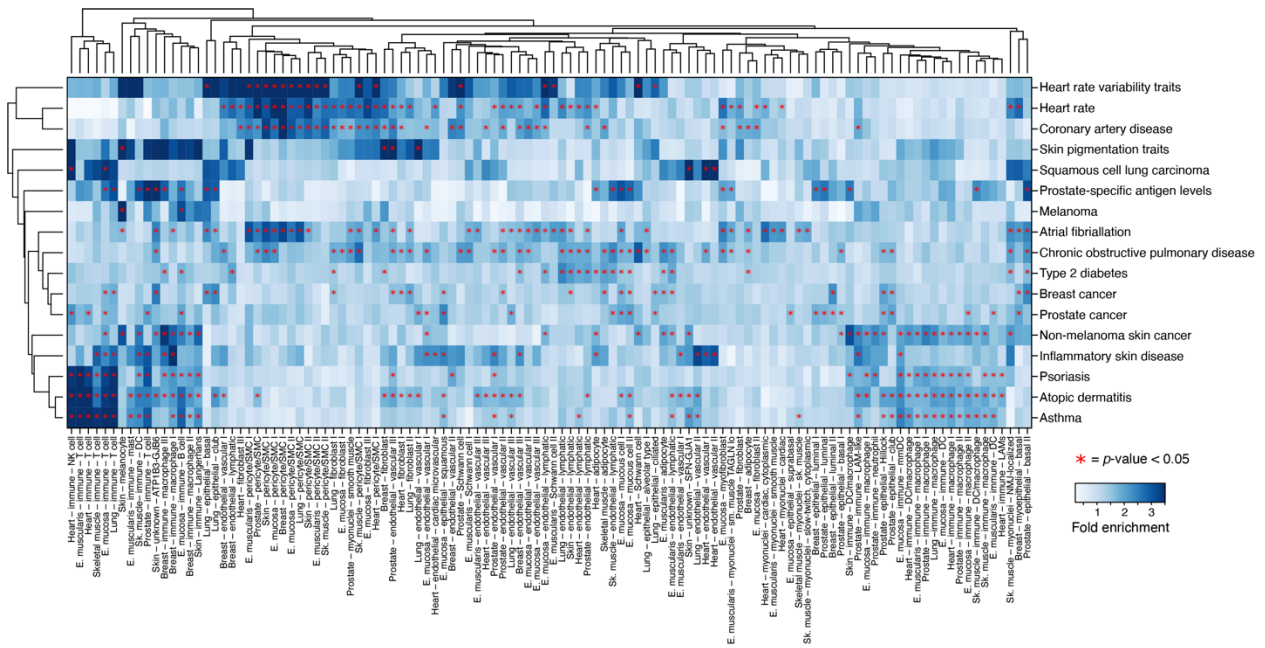

**Fig. S30. Cell type specificity enrichment of 21 complex traits across granular cell types from 8 tissues.** Fold-enrichment (color bar) of each GWAS locus set (rows) for specificity in each granular cell type category (columns). Red stars: nominal significance ( $P < 0.05$ ). Only traits with at least one enrichment at tissue-wide significance (BH FDR  $< 0.05$  correcting for number of cell types tested per tissue per trait) are shown. Rows and columns are hierarchically clustered using the Euclidean distance and average linkage method. Red stars denote nominal significance.

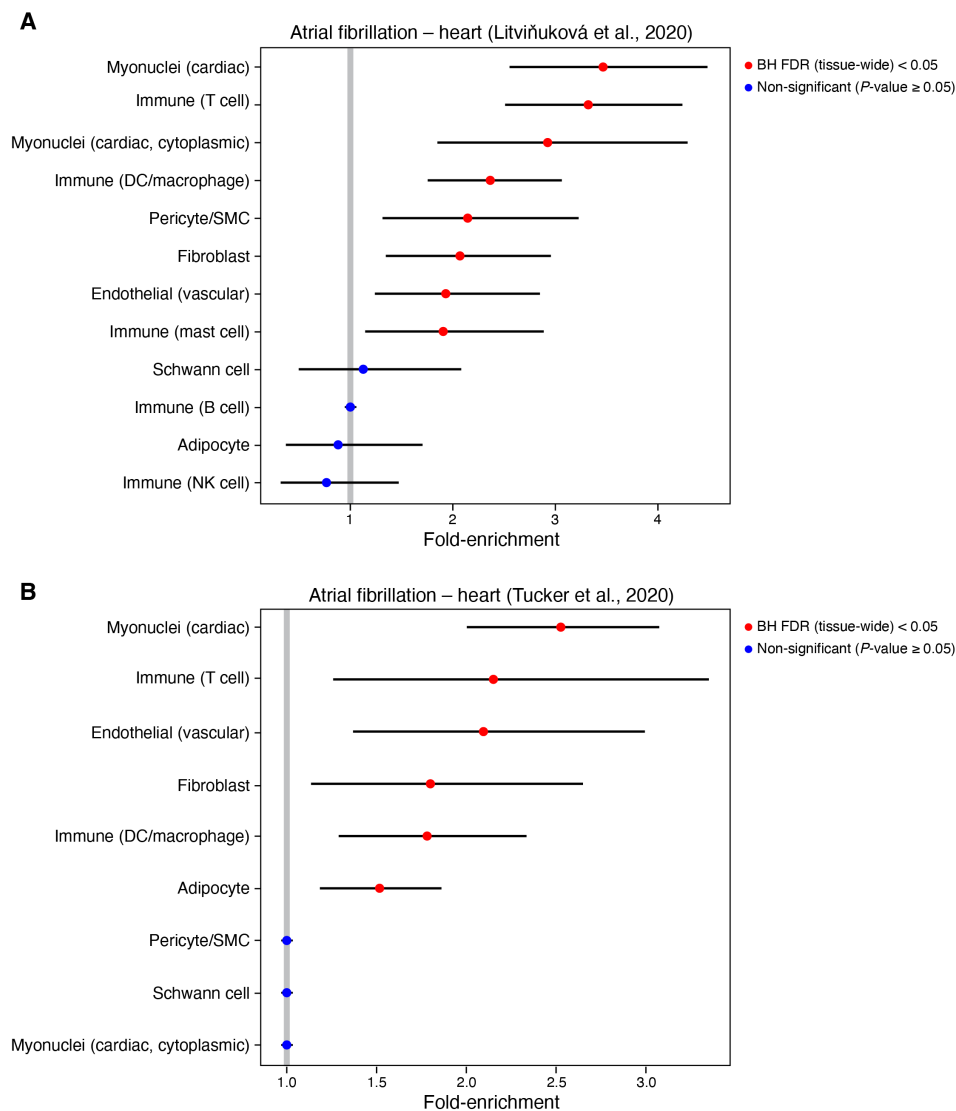

**Fig. S31. Cell type specific enrichment of e/sQTL genes mapped to Atrial Fibrillation GWAS loci in two non-GTEX snRNA-seq heart studies.** Fold-enrichment (*x*-axis) of cell type specific expression (*y*-axis) of genes mapped to atrial fibrillation GWAS loci in Litviňuková et al. (34) (A) and Tucker et al. (33) (B) heart snRNA-seq. Cell clusters were defined using the cell type markers defined in this study. Error bars: 95% credible intervals. Red: tissue-wide significant (Benjamini Hochberg (BH) FDR < 0.05); Orange: nominal significant ( $P < 0.05$ ); Blue: non-significant ( $P \geq 0.05$ ). Cell type-specific gene expression was defined as  $\log_2(\text{fold-change}) > 0.5$ , false discovery rate (FDR) < 0.1, and expression in at least 5% of cells in each given cell type.



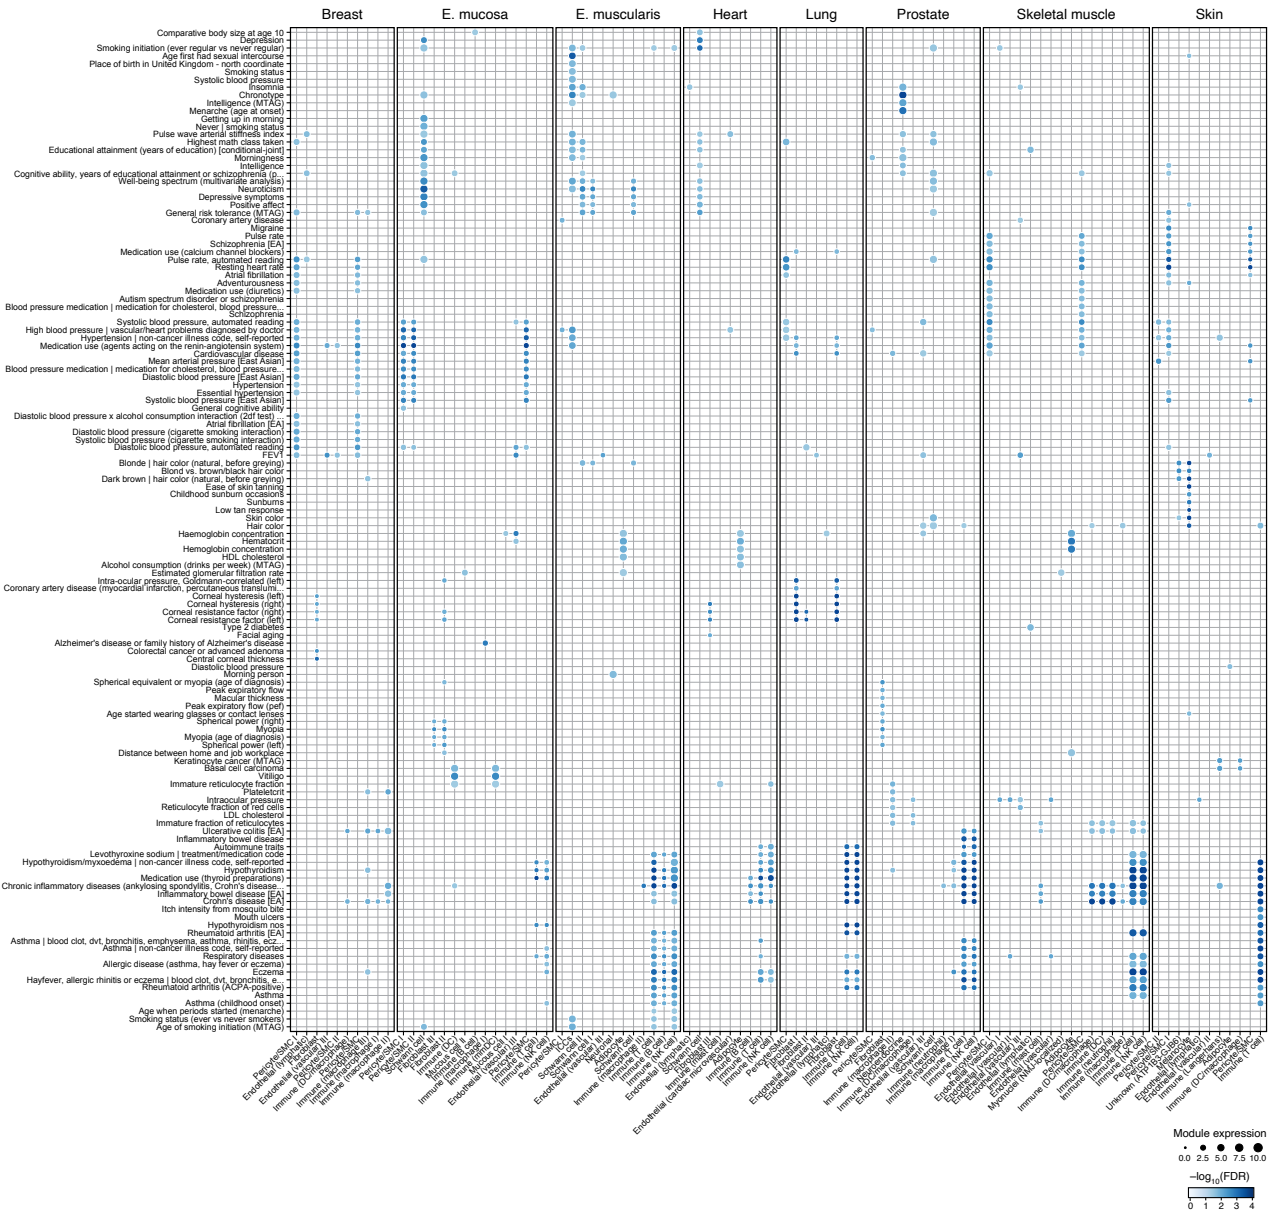

**Fig. S32. Module-based GWAS gene set enrichment analysis highlights associations between cell types and traits/diseases.** Significance ( $-\log_{10}$ (Benjamini–Hochberg FDR), dot size) of enrichment of GWAS module (rows) expression (dot color) in each cell type (columns).

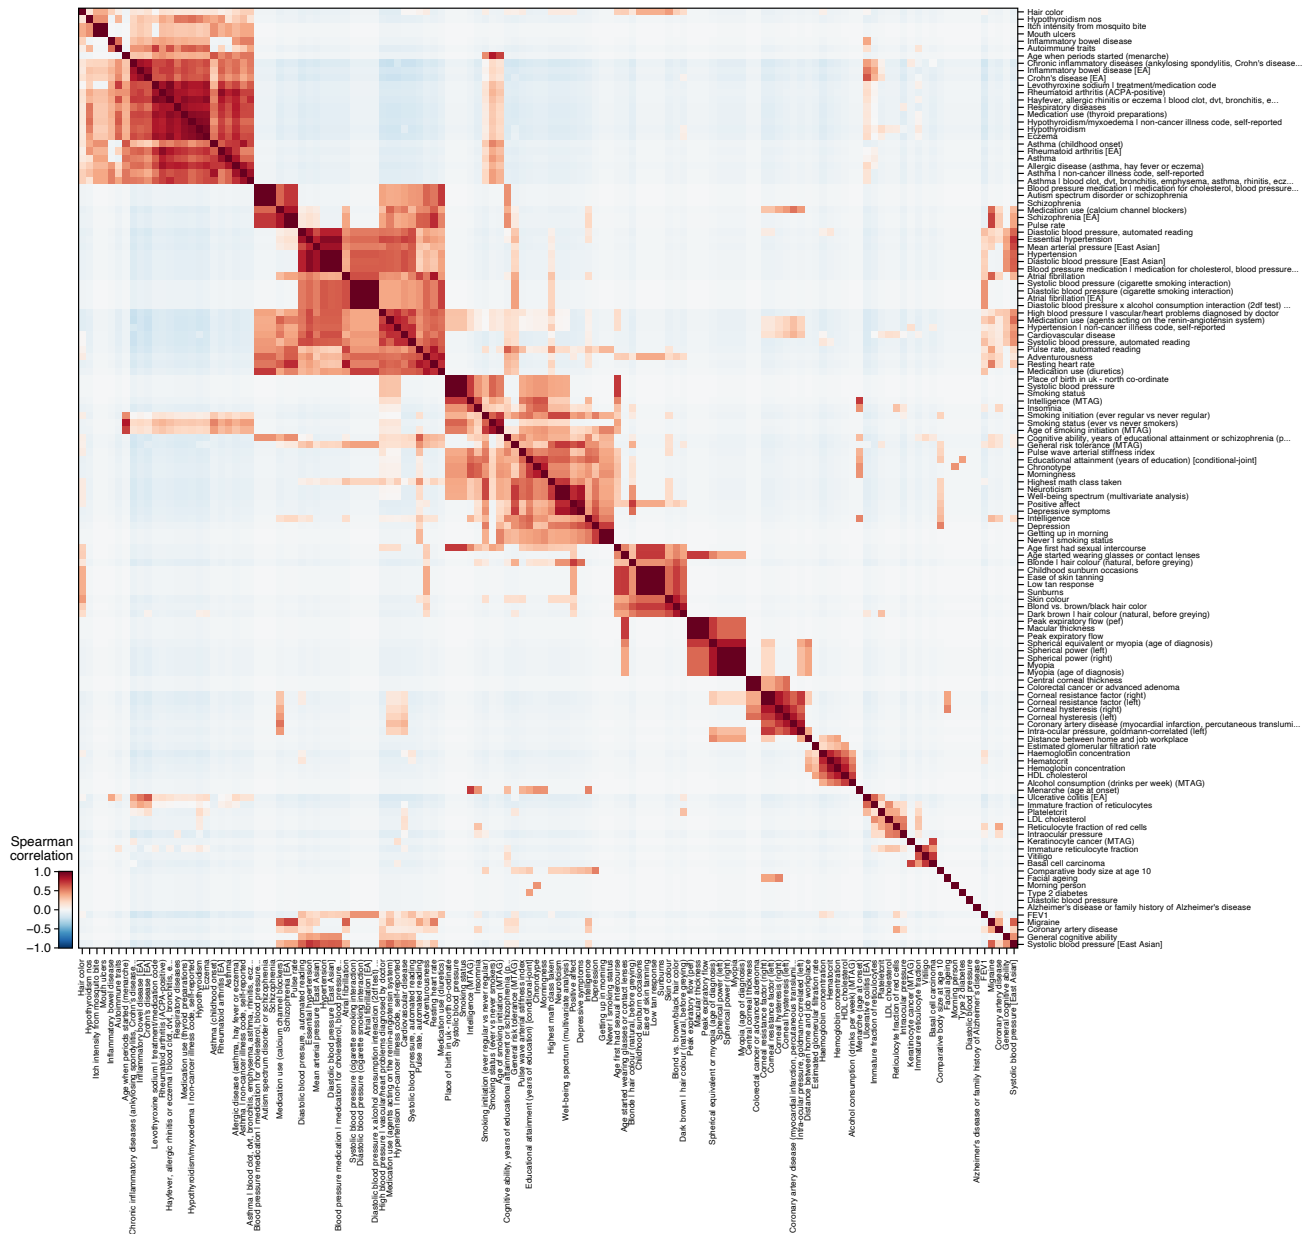

**Fig. S33. Disease/trait grouping by GWAS-cell type enrichments.** Similarity (Spearman correlation coefficient, color bar) between each pair of GWAS traits/diseases (rows, columns) based on their enriched cell type profiles (as in Fig. S32).

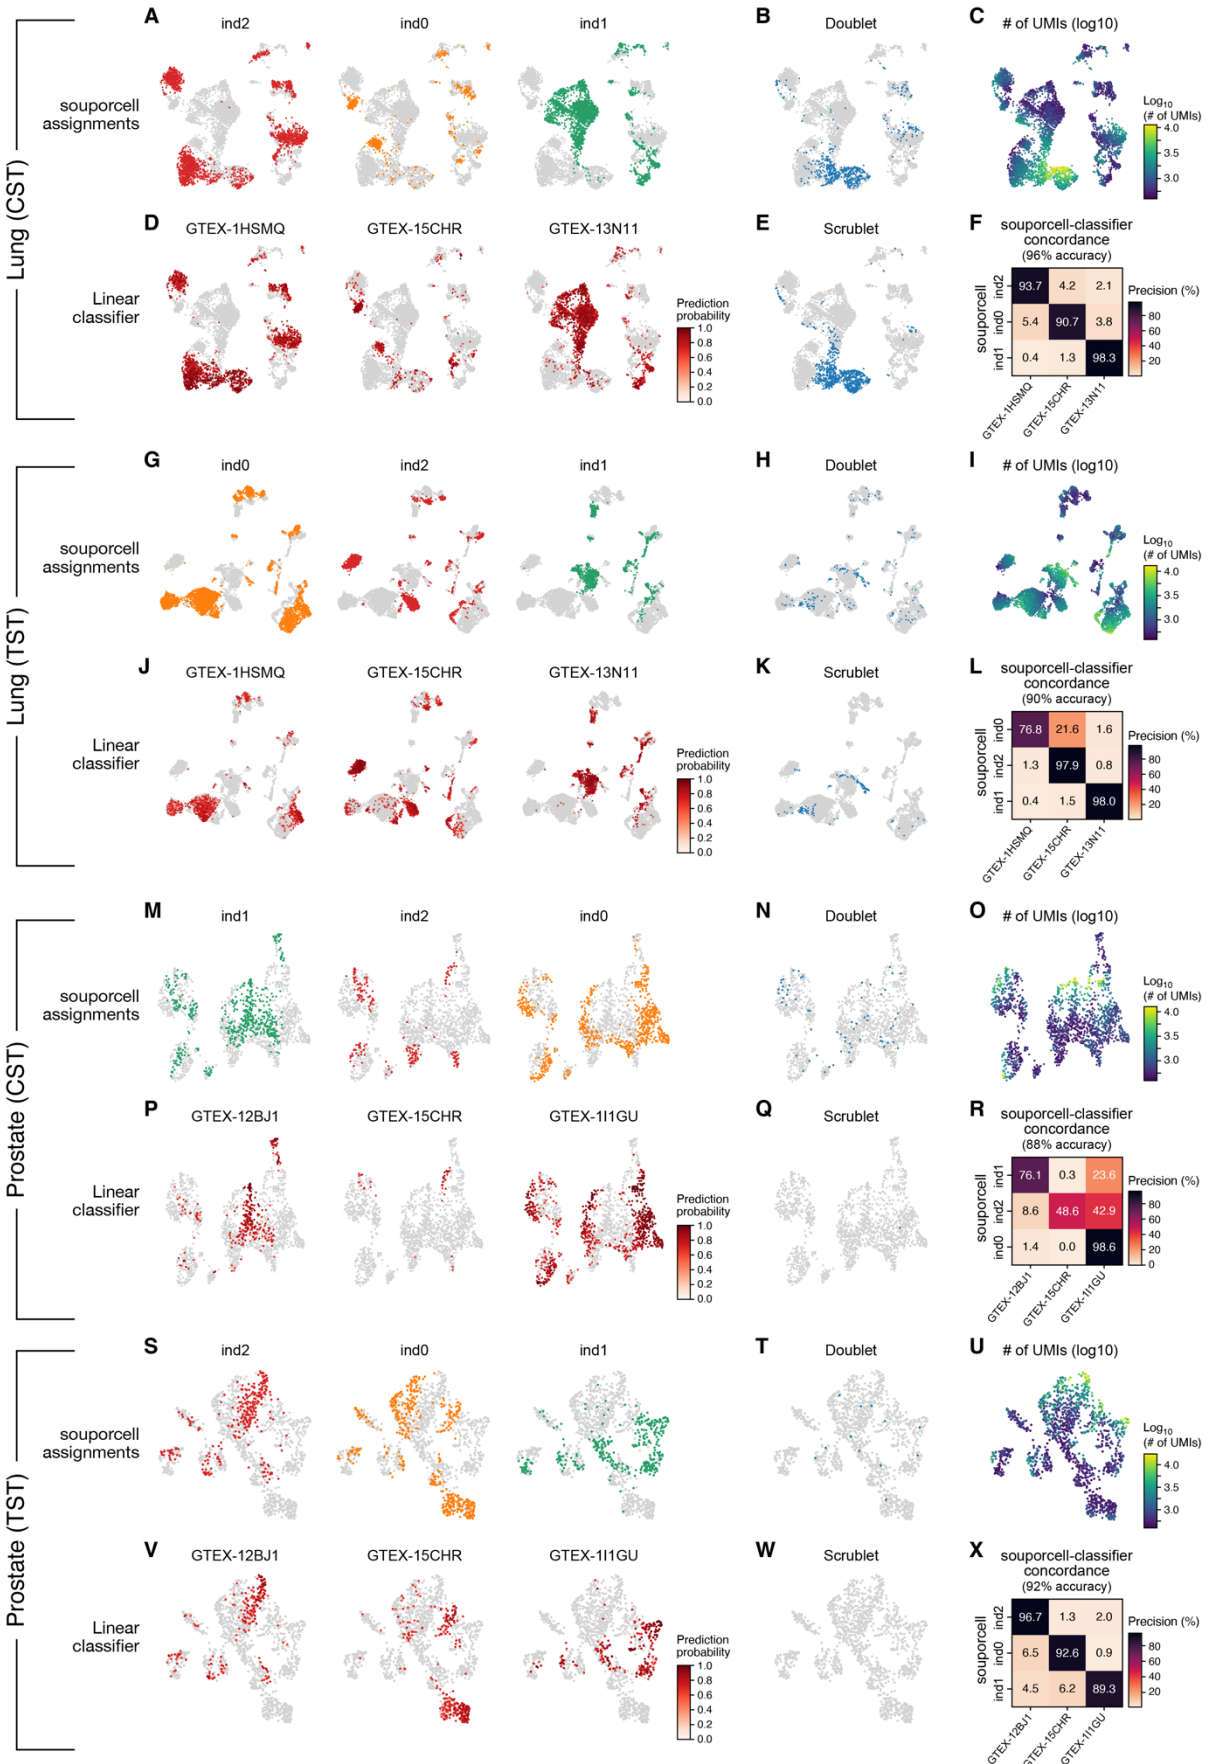

**Fig. S34. Successful processing of multiplexed samples by snRNA-seq.** Analysis of snRNA-seq profiles from frozen tissue samples from 3 individuals processed in multiplex for lung (A–L) and prostate (M–X) by either the CST (A–F, M–R) or the TST (G–L, S–X) protocols. UMAP visualizations of nuclei profiles colored by the demultiplexing assignments of each nucleus by souporcell to individuals (A, G, M, S), doublets (B, H, N, T),  $\log_{10}$ -transformed total number of UMIs (C, I, O, U), demultiplexing prediction probabilities (unassigned dots are shown grey) of an expression-based linear classifier (D, J, P, V), and doublets predicted by Scrublet (E, K, Q, W). Heat maps (F, L, R, X) show the concordance (% precision, color bar) between souporcell (rows) and the linear classifier (columns) calls. Accuracy values are labeled on top.

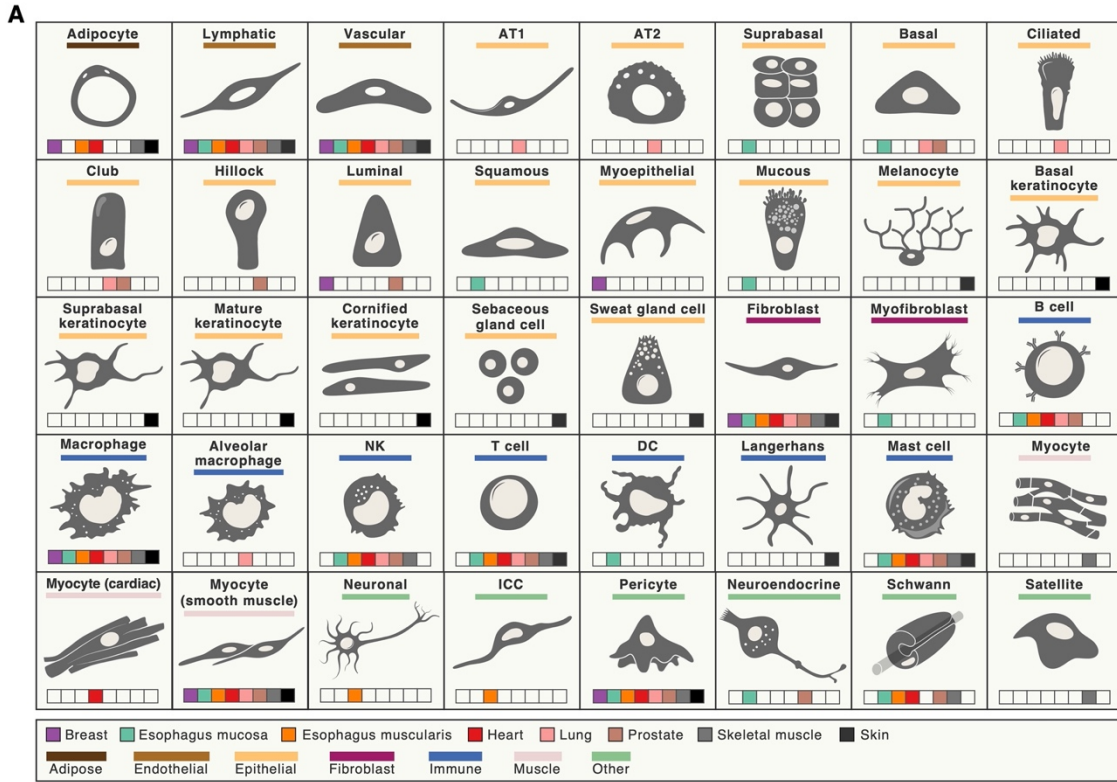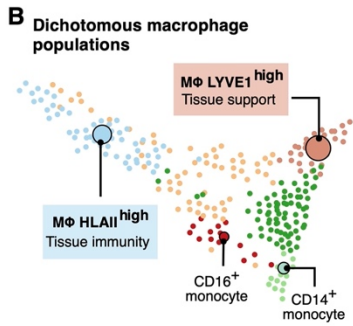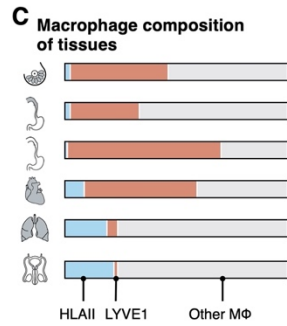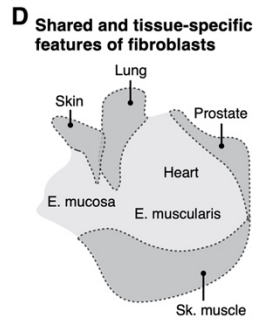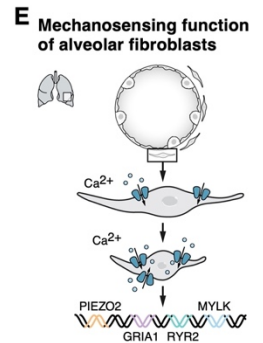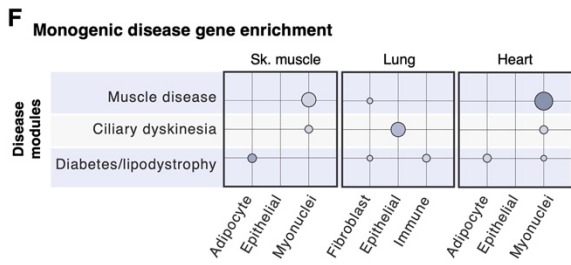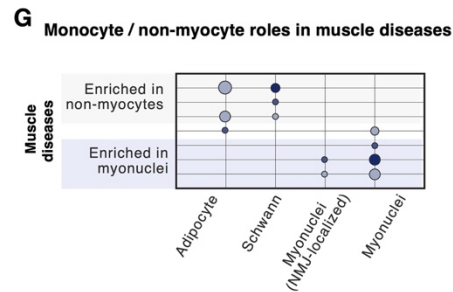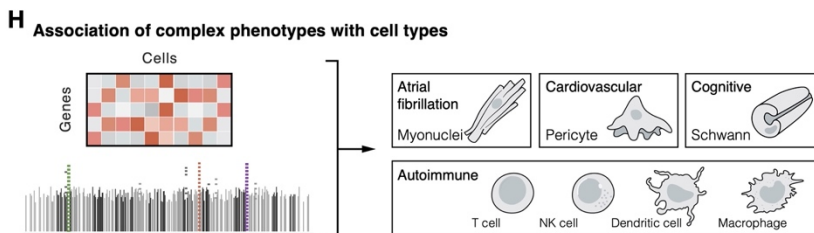

**Fig. S35. Schematic summarizing the key findings of this study.** (A) Broad cell types in the cross-tissue atlas. Illustration of 40 (of 43) broad cell types in the cross-tissue atlas labeled by cellular compartments (horizontal color line) and tissues in which the cell type is detected (colored boxes). Cytoplasmic and NMJ-localized myonuclei subsets are not shown. (B) Dichotomy between LYVE1 and HLAI-expressing macrophages and the differentiation trajectory of these populations. (C) Compositional differences of macrophages across tissues. (D) Shared and tissue-specific features of fibroblasts. (E) Mechanosensing function of alveolar fibroblasts. (F) Intra- and cross-tissue cell type association with monogenic disorders. (G) Potential roles of myonuclei subsets and non-myocytes in monogenic muscle diseases. (H) Associations of complex phenotypes with gene programs and QTL genes mapped to GWAS loci.

**Table S1. (separate file)**

Study overview, sample and individual metadata, nuclei counts and extraction solution descriptions

**Table S2. (separate file)**

Differential expression of broad and granular cell types for each tissue

**Table S3. (separate file)**

Literature-curated cell type markers and references

**Table S4. (separate file)**

Cell type harmonization and gene correlations between this study and other snRNA-seq and scRNA-seq studies

**Table S5. (separate file)**

Differential expression of granular myeloid states

**Table S6. (separate file)**

Studies used for the investigation of LAM presence and diversity

**Table S7. (separate file)**

GWAS associated to HLAII-high, LYVE1-high and LAM-like macrophage markers

**Table S8. (separate file)**

Differential expression of fibroblasts, T cells and adipocytes across tissues

**Table S9. (separate file)**

Gene set enrichment results, gene and word loadings of OMIM topic model

**Table S10. (separate file)**

Monogenic muscle diseases and associated genes obtained from the 2021 version of Benarroch et al.

**Table S11. (separate file)**

Cell type marker monogenic muscle disease gene set enrichment analysis results

**Table S12. (separate file)**

Monogenic muscle disease genes differentially expressed in broad and granular cell types with disease information

**Table S13 (separate file)**

Putative cell-cell interactions across broad cell types in each tissue

**Table S14. (separate file)**

List of GWAS and number of loci tested for cell type enrichment analysis.

**Table S15. (separate file)**

GWAS cell type specificity enrichment analysis (broad annotations)

**Table S16. (separate file)**

GWAS cell type specificity enrichment analysis (granular annotations)

**Table S17. (separate file)**

Application of ECLIPSER to heart-related traits and two separate heart snRNA-seq studies

**Table S18. (separate file)**

Gene set enrichment analysis of tissue-shared, myonuclei-specific genes driving enrichment signal of atrial fibrillation GWAS loci in heart myonuclei

**Table S19. (separate file)**

Gene set enrichment analysis of heart- and myonuclei-specific genes driving enrichment signal of atrial fibrillation GWAS loci in heart myonuclei



**Table S20. (separate file)**

Module-based GWAS enrichment analysis

## References and Notes

1. V. Tam, N. Patel, M. Turcotte, Y. Bossé, G. Paré, D. Meyre, Benefits and limitations of genome-wide association studies. *Nat. Rev. Genet.* **20**, 467–484 (2019). [doi:10.1038/s41576-019-0127-1](https://doi.org/10.1038/s41576-019-0127-1) [Medline](#)
2. M. C. Mills, C. Rahal, A scientometric review of genome-wide association studies. *Commun. Biol.* **2**, 9 (2019). [doi:10.1038/s42003-018-0261-x](https://doi.org/10.1038/s42003-018-0261-x) [Medline](#)
3. E. Cano-Gamez, G. Trynka, From GWAS to function: Using functional genomics to identify the mechanisms underlying complex diseases. *Front. Genet.* **11**, 424 (2020). [doi:10.3389/fgene.2020.00424](https://doi.org/10.3389/fgene.2020.00424) [Medline](#)
4. J. G. Camp, R. Platt, B. Treutlein, Mapping human cell phenotypes to genotypes with single-cell genomics. *Science* **365**, 1401–1405 (2019). [doi:10.1126/science.aax6648](https://doi.org/10.1126/science.aax6648) [Medline](#)
5. G. Sun, Z. Li, D. Rong, H. Zhang, X. Shi, W. Yang, W. Zheng, G. Sun, F. Wu, H. Cao, W. Tang, Y. Sun, Single-cell RNA sequencing in cancer: Applications, advances, and emerging challenges. *Mol. Ther. Oncolytics* **21**, 183–206 (2021). [doi:10.1016/j.omto.2021.04.001](https://doi.org/10.1016/j.omto.2021.04.001) [Medline](#)
6. S. S. Potter, Single-cell RNA sequencing for the study of development, physiology and disease. *Nat. Rev. Nephrol.* **14**, 479–492 (2018). [doi:10.1038/s41581-018-0021-7](https://doi.org/10.1038/s41581-018-0021-7) [Medline](#)
7. GTEx Consortium, The GTEx Consortium atlas of genetic regulatory effects across human tissues. *Science* **369**, 1318–1330 (2020). [doi:10.1126/science.aaz1776](https://doi.org/10.1126/science.aaz1776) [Medline](#)
8. S. Kasela, K. Kisand, L. Tserel, E. Kaleviste, A. Remm, K. Fischer, T. Esko, H.-J. Westra, B. P. Fairfax, S. Makino, J. C. Knight, L. Franke, A. Metspalu, P. Peterson, L. Milani, Pathogenic implications for autoimmune mechanisms derived by comparative eQTL analysis of CD4<sup>+</sup> versus CD8<sup>+</sup> T cells. *PLOS Genet.* **13**, e1006643 (2017). [doi:10.1371/journal.pgen.1006643](https://doi.org/10.1371/journal.pgen.1006643) [Medline](#)
9. M. G. P. van der Wijst, H. Brugge, D. H. de Vries, P. Deelen, M. A. Swertz, L. Franke, LifeLines Cohort Study, BIOS Consortium, Single-cell RNA sequencing identifies celltype-specific cis-eQTLs and co-expression QTLs. *Nat. Genet.* **50**, 493–497 (2018). [doi:10.1038/s41588-018-0089-9](https://doi.org/10.1038/s41588-018-0089-9) [Medline](#)
10. D. V. Zhernakova, P. Deelen, M. Vermaat, M. van Iterson, M. van Galen, W. Arindrarto, P. van 't Hof, H. Mei, F. van Dijk, H.-J. Westra, M. J. Bonder, J. van Rooij, M. Verkerk, P. M. Jhamai, M. Moed, S. M. Kielbasa, J. Bot, I. Nooren, R. Pool, J. van Dongen, J. J. Hottenga, C. D. A. Stehouwer, C. J. H. van der Kallen, C. G. Schalkwijk, A. Zhernakova, Y. Li, E. F. Tigchelaar, N. de Klein, M. Beekman, J. Deelen, D. van Heemst, L. H. van den Berg, A. Hofman, A. G. Uitterlinden, M. M. J. van Greevenbroek, J. H. Veldink, D. I. Boomsma, C. M. van Duijn, C. Wijmenga, P. E. Slagboom, M. A. Swertz, A. Isaacs, J. B. J. van Meurs, R. Jansen, B. T. Heijmans, P. A. C. 't Hoen, L. Franke, Identification of context-dependent expression quantitative trait loci in whole blood. *Nat. Genet.* **49**, 139–145 (2017). [doi:10.1038/ng.3737](https://doi.org/10.1038/ng.3737) [Medline](#)
11. S. Kim-Hellmuth, F. Aguet, M. Oliva, M. Muñoz-Aguirre, S. Kasela, V. Wucher, S. E. Castel, A. R. Hamel, A. Viñuela, A. L. Roberts, S. Mangul, X. Wen, G. Wang, A. N. Barbeira, D. Garrido-Martín, B. B. Nadel, Y. Zou, R. Bonazzola, J. Quan, A. Brown, A.

- Martinez-Perez, J. M. Soria, G. Getz, E. T. Dermitzakis, K. S. Small, M. Stephens, H. S. Xi, H. K. Im, R. Guigó, A. V. Segrè, B. E. Stranger, K. G. Ardlie, T. Lappalainen, GTEx Consortium, Cell type-specific genetic regulation of gene expression across human tissues. *Science* **369**, eaaz8528 (2020). [doi:10.1126/science.aaz8528](https://doi.org/10.1126/science.aaz8528) [Medline](#)
12. C. J. Ye, T. Feng, H.-K. Kwon, T. Raj, M. T. Wilson, N. Asinovski, C. McCabe, M. H. Lee, I. Frohlich, H.-I. Paik, N. Zaitlen, N. Hacohen, B. Stranger, P. De Jager, D. Mathis, A. Regev, C. Benoist, Intersection of population variation and autoimmunity genetics in human T cell activation. *Science* **345**, 1254665 (2014). [doi:10.1126/science.1254665](https://doi.org/10.1126/science.1254665) [Medline](#)
  13. A. S. E. Cuomo, D. D. Seaton, D. J. McCarthy, I. Martinez, M. J. Bonder, J. Garcia-Bernardo, S. Amatya, P. Madrigal, A. Isaacson, F. Buettner, A. Knights, K. N. Natarajan, L. Vallier, J. C. Marioni, M. Chhatriwala, O. Stegle, HipSci Consortium, Single-cell RNA-sequencing of differentiating iPS cells reveals dynamic genetic effects on gene expression. *Nat. Commun.* **11**, 810 (2020). [doi:10.1038/s41467-020-14457-z](https://doi.org/10.1038/s41467-020-14457-z) [Medline](#)
  14. B. J. Strober, R. Elorbany, K. Rhodes, N. Krishnan, K. Tayeb, A. Battle, Y. Gilad, Dynamic genetic regulation of gene expression during cellular differentiation. *Science* **364**, 1287–1290 (2019). [doi:10.1126/science.aaw0040](https://doi.org/10.1126/science.aaw0040) [Medline](#)
  15. N. G. Skene, J. Bryois, T. E. Bakken, G. Breen, J. J. Crowley, H. A. Gaspar, P. Giusti-Rodriguez, R. D. Hodge, J. A. Miller, A. B. Muñoz-Manchado, M. C. O'Donovan, M. J. Owen, A. F. Pardiñas, J. Ryge, J. T. R. Walters, S. Linnarsson, E. S. Lein, P. F. Sullivan, J. Hjerling-Leffler, Major Depressive Disorder Working Group of the Psychiatric Genomics Consortium, Genetic identification of brain cell types underlying schizophrenia. *Nat. Genet.* **50**, 825–833 (2018). [doi:10.1038/s41588-018-0129-5](https://doi.org/10.1038/s41588-018-0129-5) [Medline](#)
  16. C. S. Smillie, M. Biton, J. Ordovas-Montanes, K. M. Sullivan, G. Burgin, D. B. Graham, R. H. Herbst, N. Rogel, M. Slyper, J. Waldman, M. Sud, E. Andrews, G. Velonias, A. L. Haber, K. Jagadeesh, S. Vickovic, J. Yao, C. Stevens, D. Dionne, L. T. Nguyen, A.-C. Villani, M. Hofree, E. A. Creasey, H. Huang, O. Rozenblatt-Rosen, J. J. Garber, H. Khalili, A. N. Desch, M. J. Daly, A. N. Ananthakrishnan, A. K. Shalek, R. J. Xavier, A. Regev, Intra- and inter-cellular rewiring of the human colon during ulcerative colitis. *Cell* **178**, 714–730.e22 (2019). [doi:10.1016/j.cell.2019.06.029](https://doi.org/10.1016/j.cell.2019.06.029) [Medline](#)
  17. E. M. Weeks, J. C. Ulirsch, N. Y. Cheng, B. L. Trippe, R. S. Fine, J. Miao, T. A. Patwardhan, M. Kanai, J. Nasser, C. P. Fulco, K. C. Tashman, F. Aguet, T. Li, J. Ordovas-Montanes, C. S. Smillie, M. Biton, A. K. Shalek, A. N. Ananthakrishnan, R. J. Xavier, A. Regev, R. M. Gupta, K. Lage, K. G. Ardlie, J. N. Hirschhorn, E. S. Lander, J. M. Engreitz, H. K. Finucane, Leveraging polygenic enrichments of gene features to predict genes underlying complex traits and diseases. medRxiv 2020.09.08.20190561 [Preprint] (2020); <https://doi.org/10.1101/2020.09.08.20190561>.
  18. K. A. Jagadeesh, K. K. Dey, D. T. Montoro, R. Mohan, S. Gazal, J. M. Engreitz, R. J. Xavier, A. L. Price, A. Regev, Identifying disease-critical cell types and cellular processes across the human body by integration of single-cell profiles and human genetics. bioRxiv 2021.03.19.436212 [Preprint] (2021); <https://doi.org/10.1101/2021.03.19.436212>.
  19. N. Habib, I. Avraham-Davidi, A. Basu, T. Burks, K. Shekhar, M. Hofree, S. R. Choudhury, F. Aguet, E. Gelfand, K. Ardlie, D. A. Weitz, O. Rozenblatt-Rosen, F. Zhang, A. Regev,

- Massively parallel single-nucleus RNA-seq with DroNc-seq. *Nat. Methods* **14**, 955–958 (2017). [doi:10.1038/nmeth.4407](https://doi.org/10.1038/nmeth.4407) [Medline](#)
20. N. Habib, Y. Li, M. Heidenreich, L. Swiech, I. Avraham-Davidi, J. J. Trombetta, C. Hession, F. Zhang, A. Regev, Div-Seq: Single-nucleus RNA-seq reveals dynamics of rare adult newborn neurons. *Science* **353**, 925–928 (2016). [doi:10.1126/science.aad7038](https://doi.org/10.1126/science.aad7038) [Medline](#)
  21. M. J. Petrany, C. O. Swoboda, C. Sun, K. Chetal, X. Chen, M. T. Weirauch, N. Salomonis, D. P. Millay, Single-nucleus RNA-seq identifies transcriptional heterogeneity in multinucleated skeletal myofibers. *Nat. Commun.* **11**, 6374 (2020). [doi:10.1038/s41467-020-20063-w](https://doi.org/10.1038/s41467-020-20063-w) [Medline](#)
  22. H. Wu, Y. Kirita, E. L. Donnelly, B. D. Humphreys, Advantages of single-nucleus over single-cell RNA sequencing of adult kidney: Rare cell types and novel cell states revealed in fibrosis. *J. Am. Soc. Nephrol.* **30**, 23–32 (2019). [doi:10.1681/ASN.2018090912](https://doi.org/10.1681/ASN.2018090912) [Medline](#)
  23. W. Sun, H. Dong, M. Balaz, M. Slyper, E. Drokhlyansky, G. Colletuori, A. Giordano, Z. Kovanicova, P. Stefanicka, L. Balazova, L. Ding, A. S. Husted, G. Rudofsky, J. Ukropec, S. Cinti, T. W. Schwartz, A. Regev, C. Wolfrum, snRNA-seq reveals a subpopulation of adipocytes that regulates thermogenesis. *Nature* **587**, 98–102 (2020). [doi:10.1038/s41586-020-2856-x](https://doi.org/10.1038/s41586-020-2856-x) [Medline](#)
  24. H. M. Kang, M. Subramaniam, S. Targ, M. Nguyen, L. Maliskova, E. McCarthy, E. Wan, S. Wong, L. Byrnes, C. M. Lanata, R. E. Gate, S. Mostafavi, A. Marson, N. Zaitlen, L. A. Criswell, C. J. Ye, Multiplexed droplet single-cell RNA-sequencing using natural genetic variation. *Nat. Biotechnol.* **36**, 89–94 (2018). [doi:10.1038/nbt.4042](https://doi.org/10.1038/nbt.4042) [Medline](#)
  25. M. van der Wijst, D. H. de Vries, H. E. Groot, G. Trynka, C. C. Hon, M. J. Bonder, O. Stegle, M. C. Nawijn, Y. Idaghdour, P. van der Harst, C. J. Ye, J. Powell, F. J. Theis, A. Mahfouz, M. Heinig, L. Franke, The single-cell eQTLGen consortium. *eLife* **9**, e52155 (2020). [doi:10.7554/eLife.52155](https://doi.org/10.7554/eLife.52155) [Medline](#)
  26. E. Drokhlyansky, C. S. Smillie, N. Van Wittenberghe, M. Ericsson, G. K. Griffin, G. Eraslan, D. Dionne, M. S. Cuoco, M. N. Goder-Reiser, T. Sharova, O. Kuksenko, A. J. Aguirre, G. M. Boland, D. Graham, O. Rozenblatt-Rosen, R. J. Xavier, A. Regev, The human and mouse enteric nervous system at single-cell resolution. *Cell* **182**, 1606–1622.e23 (2020). [doi:10.1016/j.cell.2020.08.003](https://doi.org/10.1016/j.cell.2020.08.003) [Medline](#)
  27. T. M. Delorey, C. G. K. Ziegler, G. Heimberg, R. Normand, Y. Yang, Å. Segerstolpe, D. Abbondanza, S. J. Fleming, A. Subramanian, D. T. Montoro, K. A. Jagadeesh, K. K. Dey, P. Sen, M. Slyper, Y. H. Pita-Juárez, D. Phillips, J. Biermann, Z. Bloom-Ackermann, N. Barkas, A. Ganna, J. Gomez, J. C. Melms, I. Katsyv, E. Normandin, P. Naderi, Y. V. Popov, S. S. Raju, S. Niezen, L. T.-Y. Tsai, K. J. Siddle, M. Sud, V. M. Tran, S. K. Vellarikkal, Y. Wang, L. Amir-Zilberstein, D. S. Atri, J. Beechem, O. R. Brook, J. Chen, P. Divakar, P. Dorceus, J. M. Engreitz, A. Essene, D. M. Fitzgerald, R. Fropf, S. Gazal, J. Gould, J. Grzyb, T. Harvey, J. Hecht, T. Hether, J. Jané-Valbuena, M. Leney-Greene, H. Ma, C. McCabe, D. E. McLoughlin, E. M. Miller, C. Muus, M. Niemi, R. Padera, L. Pan, D. Pant, C. Pe'er, J. Pfiffner-Borges, C. J. Pinto, J. Plaisted, J. Reeves, M. Ross, M. Rudy, E. H. Rueckert, M. Siciliano, A. Sturm, E. Todres, A. Waghray, S. Warren, S. Zhang, D. R. Zollinger, L. Cosimi, R. M. Gupta, N. Hacohen, H. Hibshoosh, W. Hide, A. L. Price, J. Rajagopal, P. R. Tata, S. Riedel, G. Szabo, T. L. Tickle, P. T.

- Ellinor, D. Hung, P. C. Sabeti, R. Novak, R. Rogers, D. E. Ingber, Z. G. Jiang, D. Juric, M. Babadi, S. L. Farhi, B. Izar, J. R. Stone, I. S. Vlachos, I. H. Solomon, O. Ashenberg, C. B. M. Porter, B. Li, A. K. Shalek, A.-C. Villani, O. Rozenblatt-Rosen, A. Regev, COVID-19 tissue atlases reveal SARS-CoV-2 pathology and cellular targets. *Nature* **595**, 107–113 (2021). [doi:10.1038/s41586-021-03570-8](https://doi.org/10.1038/s41586-021-03570-8) [Medline](#)
28. Materials and methods are available as supplementary materials.
29. M. Slyper, C. B. M. Porter, O. Ashenberg, J. Waldman, E. Drokhlyansky, I. Wakiro, C. Smillie, G. Smith-Rosario, J. Wu, D. Dionne, S. Vigneau, J. Jané-Valbuena, T. L. Tickle, S. Napolitano, M.-J. Su, A. G. Patel, A. Karlstrom, S. Gritsch, M. Nomura, A. Waghray, S. H. Gohil, A. M. Tsankov, L. Jerby-Arnon, O. Cohen, J. Klughammer, Y. Rosen, J. Gould, L. Nguyen, M. Hofree, P. J. Tramontozzi, B. Li, C. J. Wu, B. Izar, R. Haq, F. S. Hodi, C. H. Yoon, A. N. Hata, S. J. Baker, M. L. Suvà, R. Bueno, E. H. Stover, M. R. Clay, M. A. Dyer, N. B. Collins, U. A. Matulonis, N. Wagle, B. E. Johnson, A. Rotem, O. Rozenblatt-Rosen, A. Regev, A single-cell and single-nucleus RNA-seq toolbox for fresh and frozen human tumors. *Nat. Med.* **26**, 792–802 (2020). [doi:10.1038/s41591-020-0844-1](https://doi.org/10.1038/s41591-020-0844-1) [Medline](#)
30. S. J. Fleming, J. C. Marioni, M. Babadi, CellBender remove-background: a deep generative model for unsupervised removal of background noise from scRNA-seq datasets. bioRxiv 791699 [Preprint] (2019); <https://doi.org/10.1101/791699>.
31. M. Kim, V. Franke, B. Brandt, E. D. Lowenstein, V. Schöwel, S. Spuler, A. Akalin, C. Birchmeier, Single-nucleus transcriptomics reveals functional compartmentalization in syncytial skeletal muscle cells. *Nat. Commun.* **11**, 6375 (2020). [doi:10.1038/s41467-020-20064-9](https://doi.org/10.1038/s41467-020-20064-9) [Medline](#)
32. M. Wolfien, A.-M. Galow, P. Müller, M. Bartsch, R. M. Brunner, T. Goldammer, O. Wolkenhauer, A. Hoeflich, R. David, Single-nucleus sequencing of an entire mammalian heart: Cell type composition and velocity. *Cells* **9**, 318 (2020). [doi:10.3390/cells9020318](https://doi.org/10.3390/cells9020318) [Medline](#)
33. N. R. Tucker, M. Chaffin, S. J. Fleming, A. W. Hall, V. A. Parsons, K. C. Bedi Jr., A. D. Akkad, C. N. Herndon, A. Arduini, I. Papangeli, C. Roselli, F. Aguet, S. H. Choi, K. G. Ardlie, M. Babadi, K. B. Margulies, C. M. Stegmann, P. T. Ellinor, Transcriptional and cellular diversity of the human heart. *Circulation* **142**, 466–482 (2020). [doi:10.1161/CIRCULATIONAHA.119.045401](https://doi.org/10.1161/CIRCULATIONAHA.119.045401) [Medline](#)
34. M. Litviňuková, C. Talavera-López, H. Maatz, D. Reichart, C. L. Worth, E. L. Lindberg, M. Kanda, K. Polanski, M. Heinig, M. Lee, E. R. Nadelmann, K. Roberts, L. Tuck, E. S. Fasouli, D. M. DeLaughter, B. McDonough, H. Wakimoto, J. M. Gorham, S. Samari, K. T. Mahbubani, K. Saeb-Parsy, G. Patone, J. J. Boyle, H. Zhang, H. Zhang, A. Viveiros, G. Y. Oudit, O. A. Bayraktar, J. G. Seidman, C. E. Seidman, M. Nosedá, N. Hubner, S. A. Teichmann, Cells of the adult human heart. *Nature* **588**, 466–472 (2020). [doi:10.1038/s41586-020-2797-4](https://doi.org/10.1038/s41586-020-2797-4) [Medline](#)
35. R. X. Verma, S. Kannan, B. L. Lin, K. M. Fomchenko, T. O. Nieuwenhuis, A. H. Patil, C. Lukban, X. Yang, K. Fox-Talbot, M. N. McCall, C. Kwon, D. A. Kass, A. Z. Rosenberg, M. K. Halushka, Single cell RNA-seq analysis of the flexor digitorum brevis mouse myofibers. *Skelet. Muscle* **11**, 13 (2021). [doi:10.1186/s13395-021-00269-2](https://doi.org/10.1186/s13395-021-00269-2) [Medline](#)
36. A. B. Rubenstein, G. R. Smith, U. Raue, G. Begue, K. Minchev, F. Ruf-Zamojski, V. D.

- Nair, X. Wang, L. Zhou, E. Zaslavsky, T. A. Trappe, S. Trappe, S. C. Sealfon, Single-cell transcriptional profiles in human skeletal muscle. *Sci. Rep.* **10**, 229 (2020). [doi:10.1038/s41598-019-57110-6](https://doi.org/10.1038/s41598-019-57110-6) [Medline](#)
37. K. R. Jessen, R. Mirsky, The success and failure of the Schwann cell response to nerve injury. *Front. Cell. Neurosci.* **13**, 33 (2019). [doi:10.3389/fncel.2019.00033](https://doi.org/10.3389/fncel.2019.00033) [Medline](#)
38. G. H. Henry, A. Malewska, D. B. Joseph, V. S. Malladi, J. Lee, J. Torrealba, R. J. Mauck, J. C. Gahan, G. V. Raj, C. G. Roehrborn, G. C. Hon, M. P. MacConmara, J. C. Reese, R. C. Hutchinson, C. M. Vezina, D. W. Strand, A cellular anatomy of the normal adult human prostate and prostatic urethra. *Cell Rep.* **25**, 3530–3542.e5 (2018). [doi:10.1016/j.celrep.2018.11.086](https://doi.org/10.1016/j.celrep.2018.11.086) [Medline](#)
39. M. D. Luecken, F. J. Theis, Current best practices in single-cell RNA-seq analysis: A tutorial. *Mol. Syst. Biol.* **15**, e8746 (2019). [doi:10.15252/msb.20188746](https://doi.org/10.15252/msb.20188746) [Medline](#)
40. K. J. Travaglini, A. N. Nabhan, L. Penland, R. Sinha, A. Gillich, R. V. Sit, S. Chang, S. D. Conley, Y. Mori, J. Seita, G. J. Berry, J. B. Shrager, R. J. Metzger, C. S. Kuo, N. Neff, I. L. Weissman, S. R. Quake, M. A. Krasnow, A molecular cell atlas of the human lung from single-cell RNA sequencing. *Nature* **587**, 619–625 (2020). [doi:10.1038/s41586-020-2922-4](https://doi.org/10.1038/s41586-020-2922-4) [Medline](#)
41. S. C. van den Brink, F. Sage, Á. Vértesy, B. Spanjaard, J. Peterson-Maduro, C. S. Baron, C. Robin, A. van Oudenaarden, Single-cell sequencing reveals dissociation-induced gene expression in tissue subpopulations. *Nat. Methods* **14**, 935–936 (2017). [doi:10.1038/nmeth.4437](https://doi.org/10.1038/nmeth.4437) [Medline](#)
42. E. Denisenko, B. B. Guo, M. Jones, R. Hou, L. de Kock, T. Lassmann, D. Poppe, O. Clément, R. K. Simmons, R. Lister, A. R. R. Forrest, Systematic assessment of tissue dissociation and storage biases in single-cell and single-nucleus RNA-seq workflows. *Genome Biol.* **21**, 130 (2020). [doi:10.1186/s13059-020-02048-6](https://doi.org/10.1186/s13059-020-02048-6) [Medline](#)
43. A. Zaghlool, A. Niazi, Å. K. Björklund, J. O. Westholm, A. Ameer, L. Feuk, Characterization of the nuclear and cytosolic transcriptomes in human brain tissue reveals new insights into the subcellular distribution of RNA transcripts. *Sci. Rep.* **11**, 4076 (2021). [doi:10.1038/s41598-021-83541-1](https://doi.org/10.1038/s41598-021-83541-1) [Medline](#)
44. M. Rabani, R. Raychowdhury, M. Jovanovic, M. Rooney, D. J. Stumpo, A. Pauli, N. Hacohen, A. F. Schier, P. J. Blackshear, N. Friedman, I. Amit, A. Regev, High-resolution sequencing and modeling identifies distinct dynamic RNA regulatory strategies. *Cell* **159**, 1698–1710 (2014). [doi:10.1016/j.cell.2014.11.015](https://doi.org/10.1016/j.cell.2014.11.015) [Medline](#)
45. B. W. Solnestam, H. Stranneheim, J. Hällman, M. Käller, E. Lundberg, J. Lundeberg, P. Akan, Comparison of total and cytoplasmic mRNA reveals global regulation by nuclear retention and miRNAs. *BMC Genomics* **13**, 574 (2012). [doi:10.1186/1471-2164-13-574](https://doi.org/10.1186/1471-2164-13-574) [Medline](#)
46. W. L. Hwang, K. A. Jagadeesh, J. A. Guo, H. I. Hoffman, P. Yadollahpour, R. Mohan, E. Drokhlyansky, N. Van Wittenberghe, O. Ashenberg, S. Farhi, D. Schapiro, J. Reeves, D. R. Zollinger, G. Eng, J. M. Schenkel, W. A. Freed-Pastor, C. Rodrigues, J. Gould, C. Lambden, C. Porter, A. Tsankov, D. Dionne, D. Abbondanza, J. Waldman, M. Cuoco, L. Nguyen, T. Delorey, D. Phillips, D. Ciprani, M. Kern, A. Mehta, K. Fuhrman, R. Fropf, J. Beechem, J. S. Loeffler, D. P. Ryan, C. D. Weekes, D. T. Ting, C. R. Ferrone, J. Y.



- Wo, T. S. Hong, A. J. Aguirre, O. Rozenblatt-Rosen, M. Mino-Kenudson, C. F. Castillo, A. S. Liss, T. Jacks, A. Regev, Single-nucleus and spatial transcriptomics of archival pancreatic cancer reveals multi-compartment reprogramming after neoadjuvant treatment. *bioRxiv* 2020.08.25.267336 [Preprint] (2020); <https://doi.org/10.1101/2020.08.25.267336>.
47. S. Chakarov, H. Y. Lim, L. Tan, S. Y. Lim, P. See, J. Lum, X.-M. Zhang, S. Foo, S. Nakamizo, K. Duan, W. T. Kong, R. Gentek, A. Balachander, D. Carbajo, C. Bleriot, B. Malleret, J. K. C. Tam, S. Baig, M. Shabeer, S. E. S. Toh, A. Schlitzer, A. Larbi, T. Marichal, B. Malissen, J. Chen, M. Poidinger, K. Kabashima, M. Bajenoff, L. G. Ng, V. Angeli, F. Ginhoux, Two distinct interstitial macrophage populations coexist across tissues in specific subtissular niches. *Science* **363**, eaau0964 (2019). [doi:10.1126/science.aau0964](https://doi.org/10.1126/science.aau0964) [Medline](#)
48. C. Varol, A. Mildner, S. Jung, Macrophages: Development and tissue specialization. *Annu. Rev. Immunol.* **33**, 643–675 (2015). [doi:10.1146/annurev-immunol-032414-112220](https://doi.org/10.1146/annurev-immunol-032414-112220) [Medline](#)
49. A.-C. Villani, R. Satija, G. Reynolds, S. Sarkizova, K. Shekhar, J. Fletcher, M. Griesbeck, A. Butler, S. Zheng, S. Lazo, L. Jardine, D. Dixon, E. Stephenson, E. Nilsson, I. Grundberg, D. McDonald, A. Filby, W. Li, P. L. De Jager, O. Rozenblatt-Rosen, A. A. Lane, M. Haniffa, A. Regev, N. Hacohen, Single-cell RNA-seq reveals new types of human blood dendritic cells, monocytes, and progenitors. *Science* **356**, eaah4573 (2017). [doi:10.1126/science.aah4573](https://doi.org/10.1126/science.aah4573) [Medline](#)
50. P. A. Reyfman, J. M. Walter, N. Joshi, K. R. Anekalla, A. C. McQuattie-Pimentel, S. Chiu, R. Fernandez, M. Akbarpour, C.-I. Chen, Z. Ren, R. Verma, H. Abdala-Valencia, K. Nam, M. Chi, S. Han, F. J. Gonzalez-Gonzalez, S. Soberanes, S. Watanabe, K. J. N. Williams, A. S. Flozak, T. T. Nicholson, V. K. Morgan, D. R. Winter, M. Hinchcliff, C. L. Hrusch, R. D. Guzy, C. A. Bonham, A. I. Sperling, R. Bag, R. B. Hamanaka, G. M. Mutlu, A. V. Yeldandi, S. A. Marshall, A. Shilatifard, L. A. N. Amaral, H. Perlman, J. I. Sznajder, A. C. Argento, C. T. Gillespie, J. Dematte, M. Jain, B. D. Singer, K. M. Ridge, A. P. Lam, A. Bharat, S. M. Bhorade, C. J. Gottardi, G. R. S. Budinger, A. V. Misharin, Single-cell transcriptomic analysis of human lung provides insights into the pathobiology of pulmonary fibrosis. *Am. J. Respir. Crit. Care Med.* **199**, 1517–1536 (2019). [doi:10.1164/rccm.201712-2410OC](https://doi.org/10.1164/rccm.201712-2410OC) [Medline](#)
51. D. A. Jaitin, L. Adlung, C. A. Thaiss, A. Weiner, B. Li, H. Descamps, P. Lundgren, C. Bleriot, Z. Liu, A. Deczkowska, H. Keren-Shaul, E. David, N. Zmora, S. M. Eldar, N. Lubezky, O. Shibolet, D. A. Hill, M. A. Lazar, M. Colonna, F. Ginhoux, H. Shapiro, E. Elinav, I. Amit, Lipid-associated macrophages control metabolic homeostasis in a Trem2-dependent manner. *Cell* **178**, 686–698.e14 (2019). [doi:10.1016/j.cell.2019.05.054](https://doi.org/10.1016/j.cell.2019.05.054) [Medline](#)
52. T. Capucha, G. Mizraji, H. Segev, R. Blecher-Gonen, D. Winter, A. Khalaileh, Y. Tabib, T. Attal, M. Nassar, K. Zelentsova, H. Kisos, M. Zenke, K. Seré, T. Hieronymus, T. Burstyn-Cohen, I. Amit, A. Wilensky, A.-H. Hovav, Distinct murine mucosal langerhans cell subsets develop from pre-dendritic cells and monocytes. *Immunity* **43**, 369–381 (2015). [doi:10.1016/j.immuni.2015.06.017](https://doi.org/10.1016/j.immuni.2015.06.017) [Medline](#)
53. J. Deckers, H. Hammad, E. Hoste, Langerhans cells: Sensing the environment in health and

- disease. *Front. Immunol.* **9**, 93 (2018). [doi:10.3389/fimmu.2018.00093](https://doi.org/10.3389/fimmu.2018.00093) [Medline](#)
54. E. Evren, E. Ringqvist, K. P. Tripathi, N. Sleiers, I. C. Rives, A. Alisjahbana, Y. Gao, D. Sarhan, T. Halle, C. Sorini, R. Lepzien, N. Marquardt, J. Michaëlsson, A. Smed-Sörensen, J. Botling, M. C. I. Karlsson, E. J. Villablanca, T. Willinger, Distinct developmental pathways from blood monocytes generate human lung macrophage diversity. *Immunity* **54**, 259–275.e7 (2021). [doi:10.1016/j.immuni.2020.12.003](https://doi.org/10.1016/j.immuni.2020.12.003) [Medline](#)
55. A. A. Patel, Y. Zhang, J. N. Fullerton, L. Boelen, A. Rongvaux, A. A. Maini, V. Bigley, R. A. Flavell, D. W. Gilroy, B. Asquith, D. Macallan, S. Yona, The fate and lifespan of human monocyte subsets in steady state and systemic inflammation. *J. Exp. Med.* **214**, 1913–1923 (2017). [doi:10.1084/jem.20170355](https://doi.org/10.1084/jem.20170355) [Medline](#)
56. H. Y. Lim, S. Y. Lim, C. K. Tan, C. H. Thiam, C. C. Goh, D. Carbajo, S. H. S. Chew, P. See, S. Chakarov, X. N. Wang, L. H. Lim, L. A. Johnson, J. Lum, C. Y. Fong, A. Bongso, A. Biswas, C. Goh, M. Evrard, K. P. Yeo, R. Basu, J. K. Wang, Y. Tan, R. Jain, S. Tikoo, C. Choong, W. Weninger, M. Poidinger, R. E. Stanley, M. Collin, N. S. Tan, L. G. Ng, D. G. Jackson, F. Ginhoux, V. Angeli, Hyaluronan receptor LYVE-1-expressing macrophages maintain arterial tone through hyaluronan-mediated regulation of smooth muscle cell collagen. *Immunity* **49**, 326–341.e7 (2018). [doi:10.1016/j.immuni.2018.06.008](https://doi.org/10.1016/j.immuni.2018.06.008) [Medline](#)
57. M. Bizou, R. Itier, M. Majdoubi, D. Abbadi, E. Pichery, M. Dutaur, D. Marsal, D. Calise, B. Garmy-Susini, V. Douin-Echinard, J. Roncalli, A. Parini, N. Pizzinat, Cardiac macrophage subsets differentially regulate lymphatic network remodeling during pressure overload. *Sci. Rep.* **11**, 16801 (2021). [doi:10.1038/s41598-021-95723-y](https://doi.org/10.1038/s41598-021-95723-y) [Medline](#)
58. P. Ramachandran, R. Dobie, J. R. Wilson-Kanamori, E. F. Dora, B. E. P. Henderson, N. T. Luu, J. R. Portman, K. P. Matchett, M. Brice, J. A. Marwick, R. S. Taylor, M. Efremova, R. Vento-Tormo, N. O. Carragher, T. J. Kendall, J. A. Fallowfield, E. M. Harrison, D. J. Mole, S. J. Wigmore, P. N. Newsome, C. J. Weston, J. P. Iredale, F. Tacke, J. W. Pollard, C. P. Ponting, J. C. Marioni, S. A. Teichmann, N. C. Henderson, Resolving the fibrotic niche of human liver cirrhosis at single-cell level. *Nature* **575**, 512–518 (2019). [doi:10.1038/s41586-019-1631-3](https://doi.org/10.1038/s41586-019-1631-3) [Medline](#)
59. M. J. Perugorria, A. Esparza-Baquer, F. Oakley, I. Labiano, A. Korosec, A. Jais, J. Mann, D. Tiniakos, A. Santos-Laso, A. Arbelaiz, R. Gawish, A. Sampedro, A. Fontanellas, E. Hijona, R. Jimenez-Agüero, H. Esterbauer, D. Stoiber, L. Bujanda, J. M. Banales, S. Knapp, O. Sharif, D. A. Mann, Non-parenchymal TREM-2 protects the liver from immune-mediated hepatocellular damage. *Gut* **68**, 533–546 (2019). [doi:10.1136/gutjnl-2017-314107](https://doi.org/10.1136/gutjnl-2017-314107) [Medline](#)
60. X. Xiong, H. Kuang, S. Ansari, T. Liu, J. Gong, S. Wang, X.-Y. Zhao, Y. Ji, C. Li, L. Guo, L. Zhou, Z. Chen, P. Leon-Mimila, M. T. Chung, K. Kurabayashi, J. Opp, F. Campos-Pérez, H. Villamil-Ramírez, S. Canizales-Quinteros, R. Lyons, C. N. Lumeng, B. Zhou, L. Qi, A. Huertas-Vazquez, A. J. Lusis, X. Z. S. Xu, S. Li, Y. Yu, J. Z. Li, J. D. Lin, Landscape of intercellular crosstalk in healthy and NASH liver revealed by single-cell secretome gene analysis. *Mol. Cell* **75**, 644–660.e5 (2019). [doi:10.1016/j.molcel.2019.07.028](https://doi.org/10.1016/j.molcel.2019.07.028) [Medline](#)
61. M. Guilliams, J. Bonnardel, B. Haest, B. Vanderborght, C. Wagner, A. Remmerie, A. Bujko, L. Martens, T. Thoné, R. Browaey, F. F. De Ponti, B. Vanneste, C. Zwicker, F. R.



- Svedberg, T. Vanhalewyn, A. Gonçalves, S. Lippens, B. Devriendt, E. Cox, G. Ferrero, V. Wittamer, A. Willaert, S. J. F. Kaptein, J. Neyts, K. Dallmeier, P. Geldhof, S. Casaert, B. Deplancke, P. Ten Dijke, A. Hoorens, A. Vanlander, F. Berrevoet, Y. Van Nieuwenhove, Y. Saeys, W. Saelens, H. Van Vlierberghe, L. Devisscher, C. L. Scott, Spatial proteogenomics reveals distinct and evolutionarily conserved hepatic macrophage niches. *Cell* **185**, 379–396.e38 (2022). [doi:10.1016/j.cell.2021.12.018](https://doi.org/10.1016/j.cell.2021.12.018) [Medline](#)
62. E. A. Ayaub, S. Poli, J. Ng, T. Adams, J. Schupp, L. Quesada-Arias, F. Poli, C. Cosme, M. Robertson, J. Martinez-Manzano, X. Liang, J. Villalba, J. Lederer, S. G. Chu, B. A. Raby, G. Washko, C. Coarfa, M. A. Perrella, S. El-Chemaly, N. Kaminski, I. O. Rosas, Single cell RNA-seq and mass cytometry reveals a novel and a targetable population of macrophages in idiopathic pulmonary fibrosis. *bioRxiv* 2021.01.04.425268 [Preprint] (2021); <https://doi.org/10.1101/2021.01.04.425268>.
63. C. Cochain, E. Vafadarnejad, P. Arampatzi, J. Pelisek, H. Winkels, K. Ley, D. Wolf, A.-E. Saliba, A. Zerneck, Single-cell RNA-seq reveals the transcriptional landscape and heterogeneity of aortic macrophages in murine atherosclerosis. *Circ. Res.* **122**, 1661–1674 (2018). [doi:10.1161/CIRCRESAHA.117.312509](https://doi.org/10.1161/CIRCRESAHA.117.312509) [Medline](#)
64. L. Willemsen, M. P. J. de Winther, Macrophage subsets in atherosclerosis as defined by single-cell technologies. *J. Pathol.* **250**, 705–714 (2020). [doi:10.1002/path.5392](https://doi.org/10.1002/path.5392) [Medline](#)
65. F. Ma, T. K. Hughes, R. M. B. Teles, P. R. Andrade, B. J. de Andrade Silva, O. Plazyo, L. C. Tsoi, T. Do, M. H. Wadsworth II, A. Oulee, M. T. Ochoa, E. N. Sarno, M. L. Iruela-Arispe, E. Klechevsky, B. Bryson, A. K. Shalek, B. R. Bloom, J. E. Gudjonsson, M. Pellegrini, R. L. Modlin, The cellular architecture of the antimicrobial response network in human leprosy granulomas. *Nat. Immunol.* **22**, 839–850 (2021). [doi:10.1038/s41590-021-00956-8](https://doi.org/10.1038/s41590-021-00956-8) [Medline](#)
66. H. Keren-Shaul, A. Spinrad, A. Weiner, O. Matcovitch-Natan, R. Dvir-Szternfeld, T. K. Ulland, E. David, K. Baruch, D. Lara-Astaiso, B. Toth, S. Itzkovitz, M. Colonna, M. Schwartz, I. Amit, A unique microglia type associated with restricting development of Alzheimer’s disease. *Cell* **169**, 1276–1290.e17 (2017). [doi:10.1016/j.cell.2017.05.018](https://doi.org/10.1016/j.cell.2017.05.018) [Medline](#)
67. A. Grubman, G. Chew, J. F. Ouyang, G. Sun, X. Y. Choo, C. McLean, R. K. Simmons, S. Buckberry, D. B. Vargas-Landin, D. Poppe, J. Pflueger, R. Lister, O. J. L. Rackham, E. Petretto, J. M. Polo, A single-cell atlas of entorhinal cortex from individuals with Alzheimer’s disease reveals cell-type-specific gene expression regulation. *Nat. Neurosci.* **22**, 2087–2097 (2019). [doi:10.1038/s41593-019-0539-4](https://doi.org/10.1038/s41593-019-0539-4) [Medline](#)
68. H. Mathys, J. Davila-Velderrain, Z. Peng, F. Gao, S. Mohammadi, J. Z. Young, M. Menon, L. He, F. Abdurrob, X. Jiang, A. J. Martorell, R. M. Ransohoff, B. P. Hafler, D. A. Bennett, M. Kellis, L.-H. Tsai, Single-cell transcriptomic analysis of Alzheimer’s disease. *Nature* **570**, 332–337 (2019). [doi:10.1038/s41586-019-1195-2](https://doi.org/10.1038/s41586-019-1195-2) [Medline](#)
69. C. Muus, M. D. Luecken, G. Eraslan, L. Sikkema, A. Waghray, G. Heimberg, Y. Kobayashi, E. D. Vaishnav, A. Subramanian, C. Smillie, K. A. Jagadeesh, E. T. Duong, E. Fiskin, E. Torlai Triglia, M. Ansari, P. Cai, B. Lin, J. Buchanan, S. Chen, J. Shu, A. L. Haber, H. Chung, D. T. Montoro, T. Adams, H. Aliee, S. J. Allon, Z. Andrusivova, I. Angelidis, O. Ashenberg, K. Bassler, C. Bécavin, I. Benhar, J. Bergensträhle, L. Bergensträhle, L. Bolt, E. Braun, L. T. Bui, S. Callori, M. Chaffin, E. Chichelnitskiy, J. Chiou, T. M. Conlon, M.

- S. Cuoco, A. S. E. Cuomo, M. Deprez, G. Duclos, D. Fine, D. S. Fischer, S. Ghazanfar, A. Gillich, B. Giotti, J. Gould, M. Guo, A. J. Gutierrez, A. C. Habermann, T. Harvey, P. He, X. Hou, L. Hu, Y. Hu, A. Jaiswal, L. Ji, P. Jiang, T. S. Kapellos, C. S. Kuo, L. Larsson, M. A. Leney-Greene, K. Lim, M. Litviňuková, L. S. Ludwig, S. Lukassen, W. Luo, H. Maatz, E. Madisson, L. Mamanova, K. Manakongtreecheep, S. Leroy, C. H. Mayr, I. M. Mbano, A. M. McAdams, A. N. Nabhan, S. K. Nyquist, L. Penland, O. B. Poirion, S. Poli, C. Qi, R. Queen, D. Reichart, I. Rosas, J. C. Schupp, C. V. Shea, X. Shi, R. Sinha, R. V. Sit, K. Slowikowski, M. Slyper, N. P. Smith, A. Sountoulidis, M. Strunz, T. B. Sullivan, D. Sun, C. Talavera-López, P. Tan, J. Tantivit, K. J. Travaglini, N. R. Tucker, K. A. Vernon, M. H. Wadsworth, J. Waldman, X. Wang, K. Xu, W. Yan, W. Zhao, C. G. K. Ziegler, NHLBI LungMap Consortium, Human Cell Atlas Lung Biological Network, Single-cell meta-analysis of SARS-CoV-2 entry genes across tissues and demographics. *Nat. Med.* **27**, 546–559 (2021). [doi:10.1038/s41591-020-01227-z](https://doi.org/10.1038/s41591-020-01227-z) [Medline](#)
70. R. C. Wirka, D. Wagh, D. T. Paik, M. Pjanic, T. Nguyen, C. L. Miller, R. Kundu, M. Nagao, J. Collier, T. K. Koyano, R. Fong, Y. J. Woo, B. Liu, S. B. Montgomery, J. C. Wu, K. Zhu, R. Chang, M. Alamprese, M. D. Tallquist, J. B. Kim, T. Quertermous, Atheroprotective roles of smooth muscle cell phenotypic modulation and the *TCF21* disease gene as revealed by single-cell analysis. *Nat. Med.* **25**, 1280–1289 (2019). [doi:10.1038/s41591-019-0512-5](https://doi.org/10.1038/s41591-019-0512-5) [Medline](#)
71. T. Alsaigh, D. Evans, D. Frankel, A. Torkamani, Decoding the transcriptome of atherosclerotic plaque at single-cell resolution. bioRxiv 2020.03.03.968123 [Preprint] (2020); <https://doi.org/10.1101/2020.03.03.968123>.
72. R. Vento-Tormo, M. Efremova, R. A. Botting, M. Y. Turco, M. Vento-Tormo, K. B. Meyer, J.-E. Park, E. Stephenson, K. Polański, A. Goncalves, L. Gardner, S. Holmqvist, J. Henriksson, A. Zou, A. M. Sharkey, B. Millar, B. Innes, L. Wood, A. Wilbrey-Clark, R. P. Payne, M. A. Ivarsson, S. Lisgo, A. Filby, D. H. Rowitch, J. N. Bulmer, G. J. Wright, M. J. T. Stubbington, M. Haniffa, A. Moffett, S. A. Teichmann, Single-cell reconstruction of the early maternal-fetal interface in humans. *Nature* **563**, 347–353 (2018). [doi:10.1038/s41586-018-0698-6](https://doi.org/10.1038/s41586-018-0698-6) [Medline](#)
73. K. Tan, H.-W. Song, M. Thompson, S. Munyoki, M. Sukhwani, T.-C. Hsieh, K. E. Orwig, M. F. Wilkinson, Transcriptome profiling reveals signaling conditions dictating human spermatogonia fate in vitro. *Proc. Natl. Acad. Sci. U.S.A.* **117**, 17832–17841 (2020). [doi:10.1073/pnas.2000362117](https://doi.org/10.1073/pnas.2000362117) [Medline](#)
74. J. Liao, Z. Yu, Y. Chen, M. Bao, C. Zou, H. Zhang, D. Liu, T. Li, Q. Zhang, J. Li, J. Cheng, Z. Mo, Single-cell RNA sequencing of human kidney. *Sci. Data* **7**, 4 (2020). [doi:10.1038/s41597-019-0351-8](https://doi.org/10.1038/s41597-019-0351-8) [Medline](#)
75. M. M. F. Qadir, S. Álvarez-Cubela, D. Klein, J. van Dijk, R. Muñoz-Anquela, Y. B. Moreno-Hernández, G. Lanzoni, S. Sadiq, B. Navarro-Rubio, M. T. García, Á. Díaz, K. Johnson, D. Sant, C. Ricordi, A. Griswold, R. L. Pastori, J. Domínguez-Bendala, Single-cell resolution analysis of the human pancreatic ductal progenitor cell niche. *Proc. Natl. Acad. Sci. U.S.A.* **117**, 10876–10887 (2020). [doi:10.1073/pnas.1918314117](https://doi.org/10.1073/pnas.1918314117) [Medline](#)
76. S. A. MacParland, J. C. Liu, X.-Z. Ma, B. T. Innes, A. M. Bartczak, B. K. Gage, J. Manuel, N. Khuu, J. Echeverri, I. Linares, R. Gupta, M. L. Cheng, L. Y. Liu, D. Camat, S. W.

- Chung, R. K. Seliga, Z. Shao, E. Lee, S. Ogawa, M. Ogawa, M. D. Wilson, J. E. Fish, M. Selzner, A. Ghanekar, D. Grant, P. Greig, G. Sapisochin, N. Selzner, N. Winegarden, O. Adeyi, G. Keller, G. D. Bader, I. D. McGilvray, Single cell RNA sequencing of human liver reveals distinct intrahepatic macrophage populations. *Nat. Commun.* **9**, 4383 (2018). [doi:10.1038/s41467-018-06318-7](https://doi.org/10.1038/s41467-018-06318-7) [Medline](#)
77. T. Chitiashvili, I. Dror, R. Kim, F.-M. Hsu, R. Chaudhari, E. Pandolfi, D. Chen, S. Liebscher, K. Schenke-Layland, K. Plath, A. Clark, Female human primordial germ cells display X-chromosome dosage compensation despite the absence of X-inactivation. *Nat. Cell Biol.* **22**, 1436–1446 (2020). [doi:10.1038/s41556-020-00607-4](https://doi.org/10.1038/s41556-020-00607-4) [Medline](#)
78. A. J. De Micheli, J. A. Spector, O. Elemento, B. D. Cosgrove, A reference single-cell transcriptomic atlas of human skeletal muscle tissue reveals bifurcated muscle stem cell populations. *Skelet. Muscle* **10**, 19 (2020). [doi:10.1186/s13395-020-00236-3](https://doi.org/10.1186/s13395-020-00236-3) [Medline](#)
79. T. K. Hughes, M. H. Wadsworth II, T. M. Gierahn, T. Do, D. Weiss, P. R. Andrade, F. Ma, B. J. de Andrade Silva, S. Shao, L. C. Tsoi, J. Ordovas-Montanes, J. E. Gudjonsson, R. L. Modlin, J. C. Love, A. K. Shalek, Second-strand synthesis-based massively parallel scRNA-Seq reveals cellular states and molecular features of human inflammatory skin pathologies. *Immunity* **53**, 878–894.e7 (2020). [doi:10.1016/j.immuni.2020.09.015](https://doi.org/10.1016/j.immuni.2020.09.015) [Medline](#)
80. T. B. Rojahn, V. Vorstandlechner, T. Krausgruber, W. M. Bauer, N. Alkon, C. Bangert, F. M. Thaler, F. Sadeghyar, N. Fortelny, V. Gernedl, K. Rindler, A. Elbe-Bürger, C. Bock, M. Mildner, P. M. Brunner, Single-cell transcriptomics combined with interstitial fluid proteomics defines cell type-specific immune regulation in atopic dermatitis. *J. Allergy Clin. Immunol.* **146**, 1056–1069 (2020). [doi:10.1016/j.jaci.2020.03.041](https://doi.org/10.1016/j.jaci.2020.03.041) [Medline](#)
81. K. Rindler, T. Krausgruber, F. M. Thaler, N. Alkon, C. Bangert, H. Kurz, N. Fortelny, T. B. Rojahn, C. Jonak, J. Griss, C. Bock, P. M. Brunner, Spontaneously resolved atopic dermatitis shows melanocyte and immune cell activation distinct from healthy control skin. *Front. Immunol.* **12**, 630892 (2021). [doi:10.3389/fimmu.2021.630892](https://doi.org/10.3389/fimmu.2021.630892) [Medline](#)
82. C. W. Y. Ha, A. Martin, G. D. Sepich-Poore, B. Shi, Y. Wang, K. Gouin, G. Humphrey, K. Sanders, Y. Ratnayake, K. S. L. Chan, G. Hendrick, J. R. Caldera, C. Arias, J. E. Moskowitz, S. J. Ho Sui, S. Yang, D. Underhill, M. J. Brady, S. Knott, K. Kaihara, M. J. Steinbaugh, H. Li, D. P. B. McGovern, R. Knight, P. Fleshner, S. Devkota, Translocation of viable gut microbiota to mesenteric adipose drives formation of creeping fat in humans. *Cell* **183**, 666–683.e17 (2020). [doi:10.1016/j.cell.2020.09.009](https://doi.org/10.1016/j.cell.2020.09.009) [Medline](#)
83. J. Tome-Garcia, G. Nudelman, Z. Mussa, E. Caballero, Y. Jiang, K. G. Beaumont, Y.-C. Wang, R. Sebra, S. Akbarian, D. Pinto, E. Zaslavsky, N. M. Tsankova, Cell type-specific isolation and transcriptomic profiling informs glial pathology in human temporal lobe epilepsy. bioRxiv 2020.12.11.421370 [Preprint] (2020); <https://doi.org/10.1101/2020.12.11.421370>.
84. A. Iyer, M. van Eijk, E. Silva, M. Hatta, W. Faber, J. M. F. G. Aerts, P. K. Das, Increased chitotriosidase activity in serum of leprosy patients: Association with bacillary leprosy. *Clin. Immunol.* **131**, 501–509 (2009). [doi:10.1016/j.clim.2009.02.003](https://doi.org/10.1016/j.clim.2009.02.003) [Medline](#)
85. A. Deczkowska, A. Weiner, I. Amit, The physiology, pathology, and potential therapeutic applications of the TREM2 signaling pathway. *Cell* **181**, 1207–1217 (2020). [doi:10.1016/j.cell.2020.05.003](https://doi.org/10.1016/j.cell.2020.05.003) [Medline](#)

86. Y. Kidani, S. J. Bensinger, Liver X receptor and peroxisome proliferator-activated receptor as integrators of lipid homeostasis and immunity. *Immunol. Rev.* **249**, 72–83 (2012). [doi:10.1111/j.1600-065X.2012.01153.x](https://doi.org/10.1111/j.1600-065X.2012.01153.x) [Medline](#)
87. J. C. Savage, T. Jay, E. Goduni, C. Quigley, M. M. Mariani, T. Malm, R. M. Ransohoff, B. T. Lamb, G. E. Landreth, Nuclear receptors license phagocytosis by Trem2<sup>+</sup> myeloid cells in mouse models of Alzheimer's disease. *J. Neurosci.* **35**, 6532–6543 (2015). [doi:10.1523/JNEUROSCI.4586-14.2015](https://doi.org/10.1523/JNEUROSCI.4586-14.2015) [Medline](#)
88. M. V. Plikus, X. Wang, S. Sinha, E. Forte, S. M. Thompson, E. L. Herzog, R. R. Driskell, N. Rosenthal, J. Biernaskie, V. Horsley, Fibroblasts: Origins, definitions, and functions in health and disease. *Cell* **184**, 3852–3872 (2021). [doi:10.1016/j.cell.2021.06.024](https://doi.org/10.1016/j.cell.2021.06.024) [Medline](#)
89. S. Pikkarainen, H. Tokola, R. Kerkelä, H. Ruskoaho, GATA transcription factors in the developing and adult heart. *Cardiovasc. Res.* **63**, 196–207 (2004). [doi:10.1016/j.cardiores.2004.03.025](https://doi.org/10.1016/j.cardiores.2004.03.025) [Medline](#)
90. G. M. Dittrich, N. Froese, X. Wang, H. Kroeger, H. Wang, M. Szaroszyk, M. Malek-Mohammadi, J. Cordero, M. Keles, M. Korf-Klingebiel, K. C. Wollert, R. Geffers, M. Mayr, S. J. Conway, G. Dobрева, J. Bauersachs, J. Heineke, Fibroblast GATA-4 and GATA-6 promote myocardial adaptation to pressure overload by enhancing cardiac angiogenesis. *Basic Res. Cardiol.* **116**, 26 (2021). [doi:10.1007/s00395-021-00862-y](https://doi.org/10.1007/s00395-021-00862-y) [Medline](#)
91. E. Forte, M. Ramialison, H. T. Nim, M. Mara, R. Cohn, S. L. Daigle, S. Boyd, J. Travis Hinson, M. W. Costa, N. A. Rosenthal, M. B. Furtado, Adult fibroblasts retain organ-specific transcriptomic identity. bioRxiv 2021.06.03.446915 [Preprint] (2021); <https://doi.org/10.1101/2021.06.03.446915>.
92. M. B. Furtado, M. W. Costa, E. A. Pranoto, E. Salimova, A. R. Pinto, N. T. Lam, A. Park, P. Snider, A. Chandran, R. P. Harvey, R. Boyd, S. J. Conway, J. Pearson, D. M. Kaye, N. A. Rosenthal, Cardiogenic genes expressed in cardiac fibroblasts contribute to heart development and repair. *Circ. Res.* **114**, 1422–1434 (2014). [doi:10.1161/CIRCRESAHA.114.302530](https://doi.org/10.1161/CIRCRESAHA.114.302530) [Medline](#)
93. S. J. Forrester, G. W. Booz, C. D. Sigmund, T. M. Coffman, T. Kawai, V. Rizzo, R. Scalia, S. Eguchi, Angiotensin II signal transduction: An update on mechanisms of physiology and pathophysiology. *Physiol. Rev.* **98**, 1627–1738 (2018). [doi:10.1152/physrev.00038.2017](https://doi.org/10.1152/physrev.00038.2017) [Medline](#)
94. S. K. Powers, A. B. Morton, H. Hyatt, M. J. Hinkley, The renin-angiotensin system and skeletal muscle. *Exerc. Sport Sci. Rev.* **46**, 205–214 (2018). [doi:10.1249/JES.000000000000158](https://doi.org/10.1249/JES.000000000000158) [Medline](#)
95. D. Kiyozumi, M. Takeichi, I. Nakano, Y. Sato, T. Fukuda, K. Sekiguchi, Basement membrane assembly of the integrin  $\alpha 8 \beta 1$  ligand nephronectin requires Fraser syndrome-associated proteins. *J. Cell Biol.* **197**, 677–689 (2012). [doi:10.1083/jcb.201203065](https://doi.org/10.1083/jcb.201203065) [Medline](#)
96. D. Kiyozumi, N. Sugimoto, K. Sekiguchi, Breakdown of the reciprocal stabilization of QBRICK/Frem1, Fras1, and Frem2 at the basement membrane provokes Fraser syndrome-like defects. *Proc. Natl. Acad. Sci. U.S.A.* **103**, 11981–11986 (2006). [doi:10.1073/pnas.0601011103](https://doi.org/10.1073/pnas.0601011103) [Medline](#)

97. R. Brandenberger, A. Schmidt, J. Linton, D. Wang, C. Backus, S. Denda, U. Müller, L. F. Reichardt, Identification and characterization of a novel extracellular matrix protein nephronectin that is associated with integrin  $\alpha 8\beta 1$  in the embryonic kidney. *J. Cell Biol.* **154**, 447–458 (2001). [doi:10.1083/jcb.200103069](https://doi.org/10.1083/jcb.200103069) [Medline](#)
98. Y. Sato, T. Uemura, K. Morimitsu, R. Sato-Nishiuchi, R. Manabe, J. Takagi, M. Yamada, K. Sekiguchi, Molecular basis of the recognition of nephronectin by integrin  $\alpha 8\beta 1$ . *J. Biol. Chem.* **284**, 14524–14536 (2009). [doi:10.1074/jbc.M900200200](https://doi.org/10.1074/jbc.M900200200) [Medline](#)
99. U. Müller, D. Wang, S. Denda, J. J. Meneses, R. A. Pedersen, L. F. Reichardt, Integrin  $\alpha 8\beta 1$  is critically important for epithelial-mesenchymal interactions during kidney morphogenesis. *Cell* **88**, 603–613 (1997). [doi:10.1016/S0092-8674\(00\)81903-0](https://doi.org/10.1016/S0092-8674(00)81903-0) [Medline](#)
100. J. T. Benjamin, D. C. Gaston, B. A. Halloran, L. M. Schnapp, R. Zent, L. S. Prince, The role of integrin  $\alpha 8\beta 1$  in fetal lung morphogenesis and injury. *Dev. Biol.* **335**, 407–417 (2009). [doi:10.1016/j.ydbio.2009.09.021](https://doi.org/10.1016/j.ydbio.2009.09.021) [Medline](#)
101. S. Vrontou, P. Petrou, B. I. Meyer, V. K. Galanopoulos, K. Imai, M. Yanagi, K. Chowdhury, P. J. Scambler, G. Chalepakis, *Fras1* deficiency results in cryptophthalmos, renal agenesis and blebbed phenotype in mice. *Nat. Genet.* **34**, 209–214 (2003). [doi:10.1038/ng1168](https://doi.org/10.1038/ng1168) [Medline](#)
102. P. Petrou, E. Pavlakis, Y. Dalezios, V. K. Galanopoulos, G. Chalepakis, Basement membrane distortions impair lung lobation and capillary organization in the mouse model for Fraser syndrome. *J. Biol. Chem.* **280**, 10350–10356 (2005). [doi:10.1074/jbc.M412368200](https://doi.org/10.1074/jbc.M412368200) [Medline](#)
103. J. M. Linton, G. R. Martin, L. F. Reichardt, The ECM protein nephronectin promotes kidney development via integrin  $\alpha 8\beta 1$ -mediated stimulation of *Gdnf* expression. *Development* **134**, 2501–2509 (2007). [doi:10.1242/dev.005033](https://doi.org/10.1242/dev.005033) [Medline](#)
104. L. McGregor, V. Makela, S. M. Darling, S. Vrontou, G. Chalepakis, C. Roberts, N. Smart, P. Rutland, N. Prescott, J. Hopkins, E. Bentley, A. Shaw, E. Roberts, R. Mueller, S. Jadeja, N. Philip, J. Nelson, C. Francannet, A. Perez-Aytes, A. Megarbane, B. Kerr, B. Wainwright, A. S. Woolf, R. M. Winter, P. J. Scambler, Fraser syndrome and mouse blebbed phenotype caused by mutations in *FRAS1/Fras1* encoding a putative extracellular matrix protein. *Nat. Genet.* **34**, 203–208 (2003). [doi:10.1038/ng1142](https://doi.org/10.1038/ng1142) [Medline](#)
105. Y. Shafeghati, A. Kniepert, G. Vakili, M. Zenker, Fraser syndrome due to homozygosity for a splice site mutation of *FREM2*. *Am. J. Med. Genet. A.* **146A**, 529–531 (2008). [doi:10.1002/ajmg.a.32091](https://doi.org/10.1002/ajmg.a.32091) [Medline](#)
106. A. M. Alazami, R. Shaheen, F. Alzahrani, K. Snape, A. Sagar, B. Brinkmann, P. Bavi, L. I. Al-Gazali, F. S. Alkuraya, *FREM1* mutations cause bifid nose, renal agenesis, and anorectal malformations syndrome. *Am. J. Hum. Genet.* **85**, 414–418 (2009). [doi:10.1016/j.ajhg.2009.08.010](https://doi.org/10.1016/j.ajhg.2009.08.010) [Medline](#)
107. T. J. Carney, N. M. Feitosa, C. Sonntag, K. Slanchev, J. Kluger, D. Kiyozumi, J. M. Gebauer, J. Coffin Talbot, C. B. Kimmel, K. Sekiguchi, R. Wagener, H. Schwarz, P. W. Ingham, M. Hammerschmidt, Genetic analysis of fin development in zebrafish identifies Furin and Hemicentin1 as potential novel Fraser syndrome disease genes. *PLOS Genet.* **6**, e1000907 (2010). [doi:10.1371/journal.pgen.1000907](https://doi.org/10.1371/journal.pgen.1000907) [Medline](#)



108. M. B. Buechler, R. N. Pradhan, A. T. Krishnamurty, C. Cox, A. K. Calviello, A. W. Wang, Y. A. Yang, L. Tam, R. Caothien, M. Roose-Girma, Z. Modrusan, J. R. Arron, R. Bourgon, S. Müller, S. J. Turley, Cross-tissue organization of the fibroblast lineage. *Nature* **593**, 575–579 (2021). [doi:10.1038/s41586-021-03549-5](https://doi.org/10.1038/s41586-021-03549-5) [Medline](#)
109. M. Weinstein, X. Xu, K. Ohyama, C. X. Deng, FGFR-3 and FGFR-4 function cooperatively to direct alveogenesis in the murine lung. *Development* **125**, 3615–3623 (1998). [doi:10.1242/dev.125.18.3615](https://doi.org/10.1242/dev.125.18.3615) [Medline](#)
110. M. Rezvani, J. Wilde, P. Vitt, B. Mailaparambil, R. Grychtol, M. Krueger, A. Heinzmann, Association of a FGFR-4 gene polymorphism with bronchopulmonary dysplasia and neonatal respiratory distress. *Dis. Markers* **35**, 633–640 (2013). [doi:10.1155/2013/932356](https://doi.org/10.1155/2013/932356) [Medline](#)
111. K. Nonomura, S.-H. Woo, R. B. Chang, A. Gillich, Z. Qiu, A. G. Francisco, S. S. Ranade, S. D. Liberles, A. Patapoutian, Piezo2 senses airway stretch and mediates lung inflation-induced apnoea. *Nature* **541**, 176–181 (2017). [doi:10.1038/nature20793](https://doi.org/10.1038/nature20793) [Medline](#)
112. A. Delle Vedove, M. Storbeck, R. Heller, I. Hölker, M. Hebbbar, A. Shukla, O. Magnusson, S. Cirak, K. M. Girisha, M. O’Driscoll, B. Loeys, B. Wirth, Biallelic loss of proprioception-related PIEZO2 causes muscular atrophy with perinatal respiratory distress, arthrogryposis, and scoliosis. *Am. J. Hum. Genet.* **99**, 1206–1216 (2016). [doi:10.1016/j.ajhg.2016.09.019](https://doi.org/10.1016/j.ajhg.2016.09.019) [Medline](#)
113. I. Y. Kuo, B. E. Ehrlich, Signaling in muscle contraction. *Cold Spring Harb. Perspect. Biol.* **7**, a006023 (2015). [doi:10.1101/cshperspect.a006023](https://doi.org/10.1101/cshperspect.a006023) [Medline](#)
114. D. T. Montoro, A. L. Haber, M. Biton, V. Vinarsky, B. Lin, S. E. Birket, F. Yuan, S. Chen, H. M. Leung, J. Villoria, N. Rogel, G. Burgin, A. M. Tsankov, A. Waghray, M. Slyper, J. Waldman, L. Nguyen, D. Dionne, O. Rozenblatt-Rosen, P. R. Tata, H. Mou, M. Shivaraju, H. Bihler, M. Mense, G. J. Tearney, S. M. Rowe, J. F. Engelhardt, A. Regev, J. Rajagopal, A revised airway epithelial hierarchy includes CFTR-expressing ionocytes. *Nature* **560**, 319–324 (2018). [doi:10.1038/s41586-018-0393-7](https://doi.org/10.1038/s41586-018-0393-7) [Medline](#)
115. L. W. Plasschaert, R. Žilionis, R. Choo-Wing, V. Savova, J. Knehr, G. Roma, A. M. Klein, A. B. Jaffe, A single-cell atlas of the airway epithelium reveals the CFTR-rich pulmonary ionocyte. *Nature* **560**, 377–381 (2018). [doi:10.1038/s41586-018-0394-6](https://doi.org/10.1038/s41586-018-0394-6) [Medline](#)
116. J. S. Amberger, C. A. Bocchini, A. F. Scott, A. Hamosh, OMIM.org: Leveraging knowledge across phenotype-gene relationships. *Nucleic Acids Res.* **47**, D1038–D1043 (2019). [doi:10.1093/nar/gky1151](https://doi.org/10.1093/nar/gky1151) [Medline](#)
117. K. Inaba, K. Mizuno, Sperm dysfunction and ciliopathy. *Reprod. Med. Biol.* **15**, 77–94 (2015). [doi:10.1007/s12522-015-0225-5](https://doi.org/10.1007/s12522-015-0225-5) [Medline](#)
118. L. Benarroch, G. Bonne, F. Rivier, D. Hamroun, The 2021 version of the gene table of neuromuscular disorders (nuclear genome). *Neuromuscul. Disord.* **30**, 1008–1048 (2020). [doi:10.1016/j.nmd.2020.11.009](https://doi.org/10.1016/j.nmd.2020.11.009) [Medline](#)
119. R. Csapo, M. Gumpenberger, B. Wessner, Skeletal muscle extracellular matrix – What do we know about its composition, regulation, and physiological roles? A narrative review. *Front. Physiol.* **11**, 253 (2020). [doi:10.3389/fphys.2020.00253](https://doi.org/10.3389/fphys.2020.00253) [Medline](#)
120. K. Ohlendieck, D. Swandulla, Complexity of skeletal muscle degeneration: Multi-systems

- pathophysiology and organ crosstalk in dystrophinopathy. *Pflugers Arch.* **473**, 1813–1839 (2021). [doi:10.1007/s00424-021-02623-1](https://doi.org/10.1007/s00424-021-02623-1) [Medline](#)
121. J. Verschuuren, E. Strijbos, A. Vincent, Neuromuscular junction disorders. *Handb. Clin. Neurol.* **133**, 447–466 (2016). [doi:10.1016/B978-0-444-63432-0.00024-4](https://doi.org/10.1016/B978-0-444-63432-0.00024-4) [Medline](#)
122. B. B. Cummings, J. L. Marshall, T. Tukiainen, M. Lek, S. Donkervoort, A. R. Foley, V. Bolduc, L. B. Waddell, S. A. Sandaradura, G. L. O’Grady, E. Estrella, H. M. Reddy, F. Zhao, B. Weisburd, K. J. Karczewski, A. H. O’Donnell-Luria, D. Birnbaum, A. Sarkozy, Y. Hu, H. Gonorazky, K. Claeys, H. Joshi, A. Bournazos, E. C. Oates, R. Ghaoui, M. R. Davis, N. G. Laing, A. Topf, P. B. Kang, A. H. Beggs, K. N. North, V. Straub, J. J. Dowling, F. Muntoni, N. F. Clarke, S. T. Cooper, C. G. Bönnemann, D. G. MacArthur, Genotype-Tissue Expression Consortium, Improving genetic diagnosis in Mendelian disease with transcriptome sequencing. *Sci. Transl. Med.* **9**, eaal5209 (2017). [doi:10.1126/scitranslmed.aal5209](https://doi.org/10.1126/scitranslmed.aal5209) [Medline](#)
123. H. D. Gonorazky, S. Naumenko, A. K. Ramani, V. Nelakuditi, P. Mashouri, P. Wang, D. Kao, K. Ohri, S. Viththiyapaskaran, M. A. Tarnopolsky, K. D. Mathews, S. A. Moore, A. N. Osorio, D. Villanova, D. U. Kemaladewi, R. D. Cohn, M. Brudno, J. J. Dowling, Expanding the boundaries of RNA sequencing as a diagnostic tool for rare mendelian disease. *Am. J. Hum. Genet.* **104**, 466–483 (2019). [doi:10.1016/j.ajhg.2019.01.012](https://doi.org/10.1016/j.ajhg.2019.01.012) [Medline](#)
124. A. E. Vanhaesebrouck, D. Beeson, The congenital myasthenic syndromes: Expanding genetic and phenotypic spectrums and refining treatment strategies. *Curr. Opin. Neurol.* **32**, 696–703 (2019). [doi:10.1097/WCO.0000000000000736](https://doi.org/10.1097/WCO.0000000000000736) [Medline](#)
125. A. M. Maggs, C. Huxley, S. M. Hughes, Nerve-dependent changes in skeletal muscle myosin heavy chain after experimental denervation and cross-reinnervation and in a demyelinating mouse model of Charcot-Marie-Tooth disease type 1A. *Muscle Nerve* **38**, 1572–1584 (2008). [doi:10.1002/mus.21106](https://doi.org/10.1002/mus.21106) [Medline](#)
126. C. G. Bönnemann, The collagen VI-related myopathies: Muscle meets its matrix. *Nat. Rev. Neurol.* **7**, 379–390 (2011). [doi:10.1038/nrneurol.2011.81](https://doi.org/10.1038/nrneurol.2011.81) [Medline](#)
127. A. de Morrée, B. Flix, I. Bagaric, J. Wang, M. van den Boogaard, L. Grand Moursel, R. R. Frants, I. Illa, E. Gallardo, R. Toes, S. M. van der Maarel, Dysferlin regulates cell adhesion in human monocytes. *J. Biol. Chem.* **288**, 14147–14157 (2013). [doi:10.1074/jbc.M112.448589](https://doi.org/10.1074/jbc.M112.448589) [Medline](#)
128. J. Lin, H. Wu, P. T. Tarr, C.-Y. Zhang, Z. Wu, O. Boss, L. F. Michael, P. Puigserver, E. Isotani, E. N. Olson, B. B. Lowell, R. Bassel-Duby, B. M. Spiegelman, Transcriptional co-activator PGC-1 $\alpha$  drives the formation of slow-twitch muscle fibres. *Nature* **418**, 797–801 (2002). [doi:10.1038/nature00904](https://doi.org/10.1038/nature00904) [Medline](#)
129. H. Tajsharghi, S. Hammans, C. Lindberg, A. Lossos, N. F. Clarke, I. Mazanti, L. B. Waddell, Y. Fellig, N. Foulds, H. Katifi, R. Webster, O. Raheem, B. Udd, Z. Argov, A. Oldfors, Recessive myosin myopathy with external ophthalmoplegia associated with *MYH2* mutations. *Eur. J. Hum. Genet.* **22**, 801–808 (2014). [doi:10.1038/ejhg.2013.250](https://doi.org/10.1038/ejhg.2013.250) [Medline](#)
130. V. Pisani, M. B. Panico, C. Terracciano, E. Bonifazi, G. Meola, G. Novelli, G. Bernardi, C. Angelini, R. Massa, Preferential central nucleation of type 2 myofibers is an invariable

- feature of myotonic dystrophy type 2. *Muscle Nerve* **38**, 1405–1411 (2008).  
[doi:10.1002/mus.21122](https://doi.org/10.1002/mus.21122) [Medline](#)
131. A. Vihola, G. Bassez, G. Meola, S. Zhang, H. Haapasalo, A. Paetau, E. Mancinelli, A. Rouche, J. Y. Hogrel, P. Laforêt, T. Maisonobe, J. F. Pellissier, R. Krahe, B. Eymard, B. Udd, Histopathological differences of myotonic dystrophy type 1 (DM1) and PROMM/DM2. *Neurology* **60**, 1854–1857 (2003).  
[doi:10.1212/01.WNL.0000065898.61358.09](https://doi.org/10.1212/01.WNL.0000065898.61358.09) [Medline](#)
132. L. S. Krivickas, T. Ansved, D. Suh, W. R. Frontera, Contractile properties of single muscle fibers in myotonic dystrophy. *Muscle Nerve* **23**, 529–537 (2000).  
[doi:10.1002/\(SICI\)1097-4598\(200004\)23:4<529:AID-MUS11>3.0.CO;2-Y](https://doi.org/10.1002/(SICI)1097-4598(200004)23:4<529:AID-MUS11>3.0.CO;2-Y) [Medline](#)
133. N. F. Clarke, Congenital fiber-type disproportion. *Semin. Pediatr. Neurol.* **18**, 264–271 (2011). [doi:10.1016/j.spn.2011.10.008](https://doi.org/10.1016/j.spn.2011.10.008) [Medline](#)
134. J. Strakova, F. Kamdar, D. Kulhanek, M. Razzoli, D. J. Garry, J. M. Ervasti, A. Bartolomucci, D. Townsend, Integrative effects of dystrophin loss on metabolic function of the mdx mouse. *Sci. Rep.* **8**, 13624 (2018). [doi:10.1038/s41598-018-31753-3](https://doi.org/10.1038/s41598-018-31753-3) [Medline](#)
135. D. Duan, N. Goemans, S. Takeda, E. Mercuri, A. Aartsma-Rus, Duchenne muscular dystrophy. *Nat. Rev. Dis. Primers* **7**, 13 (2021). [doi:10.1038/s41572-021-00248-3](https://doi.org/10.1038/s41572-021-00248-3) [Medline](#)
136. M. Sander, B. Chavoshan, S. A. Harris, S. T. Iannaccone, J. T. Stull, G. D. Thomas, R. G. Victor, Functional muscle ischemia in neuronal nitric oxide synthase-deficient skeletal muscle of children with Duchenne muscular dystrophy. *Proc. Natl. Acad. Sci. U.S.A.* **97**, 13818–13823 (2000). [doi:10.1073/pnas.250379497](https://doi.org/10.1073/pnas.250379497) [Medline](#)
137. P. A. C. 't Hoen, E. J. de Meijer, J. M. Boer, R. H. A. M. Vossen, R. Turk, R. G. H. J. Maatman, K. E. Davies, G.-J. B. van Ommen, J. C. T. van Deutekom, J. T. den Dunnen, Generation and characterization of transgenic mice with the full-length human DMD gene. *J. Biol. Chem.* **283**, 5899–5907 (2008). [doi:10.1074/jbc.M709410200](https://doi.org/10.1074/jbc.M709410200) [Medline](#)
138. M. W. Hogarth, A. Defour, C. Lazarski, E. Gallardo, J. Diaz Manera, T. A. Partridge, K. Nagaraju, J. K. Jaiswal, Fibroadipogenic progenitors are responsible for muscle loss in limb girdle muscular dystrophy 2B. *Nat. Commun.* **10**, 2430 (2019). [doi:10.1038/s41467-019-10438-z](https://doi.org/10.1038/s41467-019-10438-z) [Medline](#)
139. D. R. Lemos, F. Babaeijandaghi, M. Low, C.-K. Chang, S. T. Lee, D. Fiore, R.-H. Zhang, A. Natarajan, S. A. Nedospasov, F. M. V. Rossi, Nilotinib reduces muscle fibrosis in chronic muscle injury by promoting TNF-mediated apoptosis of fibro/adipogenic progenitors. *Nat. Med.* **21**, 786–794 (2015). [doi:10.1038/nm.3869](https://doi.org/10.1038/nm.3869) [Medline](#)
140. GTEx Consortium, Genetic effects on gene expression across human tissues. *Nature* **550**, 204–213 (2017). [doi:10.1038/nature24277](https://doi.org/10.1038/nature24277) [Medline](#)
141. X. Unamuno, J. Gómez-Ambrosi, B. Ramírez, A. Rodríguez, S. Becerril, V. Valentí, R. Moncada, C. Silva, J. Salvador, G. Frühbeck, V. Catalán, Dermatopontin, a novel adipokine promoting adipose tissue extracellular matrix remodelling and inflammation in obesity. *J. Clin. Med.* **9**, 1069 (2020). [doi:10.3390/jcm9041069](https://doi.org/10.3390/jcm9041069) [Medline](#)
142. S.-H. Heo, J.-Y. Cho, ELK3 suppresses angiogenesis by inhibiting the transcriptional activity of ETS-1 on MT1-MMP. *Int. J. Biol. Sci.* **10**, 438–447 (2014).



[doi:10.7150/ijbs.8095](https://doi.org/10.7150/ijbs.8095) [Medline](#)

143. P. Podkalicka, O. Mucha, J. Dulak, A. Loboda, Targeting angiogenesis in Duchenne muscular dystrophy. *Cell. Mol. Life Sci.* **76**, 1507–1528 (2019). [doi:10.1007/s00018-019-03006-7](https://doi.org/10.1007/s00018-019-03006-7) [Medline](#)
144. M. Efremova, M. Vento-Tormo, S. A. Teichmann, R. Vento-Tormo, CellPhoneDB: Inferring cell-cell communication from combined expression of multi-subunit ligand-receptor complexes. *Nat. Protoc.* **15**, 1484–1506 (2020). [doi:10.1038/s41596-020-0292-x](https://doi.org/10.1038/s41596-020-0292-x) [Medline](#)
145. G. Narkis, R. Ofir, E. Manor, D. Landau, K. Elbedour, O. S. Birk, Lethal congenital contractural syndrome type 2 (LCCS2) is caused by a mutation in *ERBB3* (*Her3*), a modulator of the phosphatidylinositol-3-kinase/Akt pathway. *Am. J. Hum. Genet.* **81**, 589–595 (2007). [doi:10.1086/520770](https://doi.org/10.1086/520770) [Medline](#)
146. O. Ibraghimov-Beskrovnaya, J. M. Ervasti, C. J. Leveille, C. A. Slaughter, S. W. Sernett, K. P. Campbell, Primary structure of dystrophin-associated glycoproteins linking dystrophin to the extracellular matrix. *Nature* **355**, 696–702 (1992). [doi:10.1038/355696a0](https://doi.org/10.1038/355696a0) [Medline](#)
147. A. R. Gillies, R. L. Lieber, Structure and function of the skeletal muscle extracellular matrix. *Muscle Nerve* **44**, 318–331 (2011). [doi:10.1002/mus.22094](https://doi.org/10.1002/mus.22094) [Medline](#)
148. S.-Y. Dai, R. Nakagawa, A. Itoh, H. Murakami, Y. Kashio, H. Abe, S. Katoh, K. Kontani, M. Kihara, S.-L. Zhang, T. Hata, T. Nakamura, A. Yamauchi, M. Hirashima, Galectin-9 induces maturation of human monocyte-derived dendritic cells. *J. Immunol.* **175**, 2974–2981 (2005). [doi:10.4049/jimmunol.175.5.2974](https://doi.org/10.4049/jimmunol.175.5.2974) [Medline](#)
149. H. K. Finucane, B. Bulik-Sullivan, A. Gusev, G. Trynka, Y. Reshef, P.-R. Loh, V. Anttila, H. Xu, C. Zang, K. Farh, S. Ripke, F. R. Day, S. Purcell, E. Stahl, S. Lindstrom, J. R. B. Perry, Y. Okada, S. Raychaudhuri, M. J. Daly, N. Patterson, B. M. Neale, A. L. Price, ReproGen Consortium, Schizophrenia Working Group of the Psychiatric Genomics Consortium, RACI Consortium, Partitioning heritability by functional annotation using genome-wide association summary statistics. *Nat. Genet.* **47**, 1228–1235 (2015). [doi:10.1038/ng.3404](https://doi.org/10.1038/ng.3404) [Medline](#)
150. E. R. Gamazon, A. V. Segrè, M. van de Bunt, X. Wen, H. S. Xi, F. Hormozdiari, H. Ongen, A. Konkashbaev, E. M. Derks, F. Aguet, J. Quan, D. L. Nicolae, E. Eskin, M. Kellis, G. Getz, M. I. McCarthy, E. T. Dermitzakis, N. J. Cox, K. G. Ardlie, GTEx Consortium, Using an atlas of gene regulation across 44 human tissues to inform complex disease- and trait-associated variation. *Nat. Genet.* **50**, 956–967 (2018). [doi:10.1038/s41588-018-0154-4](https://doi.org/10.1038/s41588-018-0154-4) [Medline](#)
151. A. N. Barbeira, R. Bonazzola, E. R. Gamazon, Y. Liang, Y. Park, S. Kim-Hellmuth, G. Wang, Z. Jiang, D. Zhou, F. Hormozdiari, B. Liu, A. Rao, A. R. Hamel, M. D. Pividori, F. Aguet, L. Bastarache, D. M. Jordan, M. Verbanck, R. Do, M. Stephens, K. Ardlie, M. McCarthy, S. B. Montgomery, A. V. Segrè, C. D. Brown, T. Lappalainen, X. Wen, H. K. Im, GTEx GWAS Working Group, GTEx Consortium, Exploiting the GTEx resources to decipher the mechanisms at GWAS loci. *Genome Biol.* **22**, 49 (2021). [doi:10.1186/s13059-020-02252-4](https://doi.org/10.1186/s13059-020-02252-4) [Medline](#)
152. J. M. Rouhana, J. Wang, G. Eraslan, S. Anand, A. R. Hamel, B. Cole, A. Regev, F. Aguet, K. G. Ardlie, A. V. Segre, ECLIPSER: identifying causal cell types and genes for

complex traits through single cell enrichment of e/sQTL-mapped genes in GWAS loci. bioRxiv 2021.11.24.469720 [Preprint] (2021); <https://doi.org/10.1101/2021.11.24.469720>.

153. M. Ghoussaini, E. Mountjoy, M. Carmona, G. Peat, E. M. Schmidt, A. Hercules, L. Fumis, A. Miranda, D. Carvalho-Silva, A. Buniello, T. Burdett, J. Hayhurst, J. Baker, J. Ferrer, A. Gonzalez-Uriarte, S. Jupp, M. A. Karim, G. Koscielny, S. Machlitt-Northen, C. Malangone, Z. M. Pendlington, P. Roncaglia, D. Suveges, D. Wright, O. Vrousitou, E. Papa, H. Parkinson, J. A. L. MacArthur, J. A. Todd, J. C. Barrett, J. Schwartztruber, D. G. Hulcoop, D. Ochoa, E. M. McDonagh, I. Dunham, Open Targets Genetics: Systematic identification of trait-associated genes using large-scale genetics and functional genomics. *Nucleic Acids Res.* **49**, D1311–D1320 (2021). [doi:10.1093/nar/gkaa840](https://doi.org/10.1093/nar/gkaa840) [Medline](#)
154. E. Mountjoy, E. M. Schmidt, M. Carmona, J. Schwartztruber, G. Peat, A. Miranda, L. Fumis, J. Hayhurst, A. Buniello, M. A. Karim, D. Wright, A. Hercules, E. Papa, E. B. Fauman, J. C. Barrett, J. A. Todd, D. Ochoa, I. Dunham, M. Ghoussaini, An open approach to systematically prioritize causal variants and genes at all published human GWAS trait-associated loci. *Nat. Genet.* **53**, 1527–1533 (2021). [doi:10.1038/s41588-021-00945-5](https://doi.org/10.1038/s41588-021-00945-5) [Medline](#)
155. E. Brakenhielm, K. Alitalo, Cardiac lymphatics in health and disease. *Nat. Rev. Cardiol.* **16**, 56–68 (2019). [doi:10.1038/s41569-018-0087-8](https://doi.org/10.1038/s41569-018-0087-8) [Medline](#)
156. F. Paneni, J. A. Beckman, M. A. Creager, F. Cosentino, Diabetes and vascular disease: pathophysiology, clinical consequences, and medical therapy: Part I. *Eur. Heart J.* **34**, 2436–2443 (2013). [doi:10.1093/eurheartj/ehs149](https://doi.org/10.1093/eurheartj/ehs149) [Medline](#)
157. T. R. Einarson, A. Acs, C. Ludwig, U. H. Panton, Prevalence of cardiovascular disease in type 2 diabetes: A systematic literature review of scientific evidence from across the world in 2007–2017. *Cardiovasc. Diabetol.* **17**, 83 (2018). [doi:10.1186/s12933-018-0728-6](https://doi.org/10.1186/s12933-018-0728-6) [Medline](#)
158. C. Kothari, C. Diorio, F. Durocher, The importance of breast adipose tissue in breast cancer. *Int. J. Mol. Sci.* **21**, 5760 (2020). [doi:10.3390/ijms21165760](https://doi.org/10.3390/ijms21165760) [Medline](#)
159. A. B. Kay, Allergy and allergic diseases. First of two parts. *N. Engl. J. Med.* **344**, 30–37 (2001). [doi:10.1056/NEJM200101043440106](https://doi.org/10.1056/NEJM200101043440106) [Medline](#)
160. S. J. Galli, M. Tsai, A. M. Piliponsky, The development of allergic inflammation. *Nature* **454**, 445–454 (2008). [doi:10.1038/nature07204](https://doi.org/10.1038/nature07204) [Medline](#)
161. H. Yilmaz, M. Cakmak, B. Ceydilek, C. Demir, A. Aktas, Role of interleukin-35 as a biomarker in patients with newly diagnosed Hashimoto’s thyroiditis. *Endocr. Regul.* **50**, 55–61 (2016). [doi:10.1515/enr-2016-0009](https://doi.org/10.1515/enr-2016-0009) [Medline](#)
162. Y. Li, Y. Wang, Y. Liu, Y. Wang, X. Zuo, Y. Li, X. Lu, The possible role of the novel cytokines IL-35 and IL-37 in inflammatory bowel disease. *Mediators Inflamm.* **2014**, 136329 (2014). [doi:10.1155/2014/136329](https://doi.org/10.1155/2014/136329) [Medline](#)
163. M.-H. Saeed, K. Kurosh, A. Zahra, D. M. Hossein, R. Davood, M. R. Ataollahi, Decreased serum levels of IL-27 and IL-35 in patients with Graves’ disease. *Arch. Endocrinol. Metab.* **64**, 521–527 (2021). [doi:10.20945/2359-3997000000227](https://doi.org/10.20945/2359-3997000000227) [Medline](#)

164. A. Pinggera, L. Mackenroth, A. Rump, J. Schallner, F. Beleggia, B. Wollnik, J. Striessnig, New gain-of-function mutation shows CACNA1D as recurrently mutated gene in autism spectrum disorders and epilepsy. *Hum. Mol. Genet.* **26**, 2923–2932 (2017). [doi:10.1093/hmg/ddx175](https://doi.org/10.1093/hmg/ddx175) [Medline](#)
165. R. Mysore, G. Liebisch, Y. Zhou, V. M. Olkkonen, P. A. Nidhina Haridas, Angiopoietin-like 8 (Angptl8) controls adipocyte lipolysis and phospholipid composition. *Chem. Phys. Lipids* **207**, 246–252 (2017). [doi:10.1016/j.chemphyslip.2017.05.002](https://doi.org/10.1016/j.chemphyslip.2017.05.002) [Medline](#)
166. A. Yang, E. P. Mottillo, Adipocyte lipolysis: From molecular mechanisms of regulation to disease and therapeutics. *Biochem. J.* **477**, 985–1008 (2020). [doi:10.1042/BCJ20190468](https://doi.org/10.1042/BCJ20190468) [Medline](#)
167. J. Xu, C. Falconer, Q. Nguyen, J. Crawford, B. D. McKinnon, S. Mortlock, A. Senabouth, S. Andersen, H. S. Chiu, L. Jiang, N. J. Palpant, J. Yang, M. D. Mueller, A. W. Hewitt, A. Pébay, G. W. Montgomery, J. E. Powell, L. J. M. Coin, Genotype-free demultiplexing of pooled single-cell RNA-seq. *Genome Biol.* **20**, 290 (2019). [doi:10.1186/s13059-019-1852-7](https://doi.org/10.1186/s13059-019-1852-7) [Medline](#)
168. H. Heaton, A. M. Talman, A. Knights, M. Imaz, D. J. Gaffney, R. Durbin, M. Hemberg, M. K. N. Lawniczak, Souporecell: Robust clustering of single-cell RNA-seq data by genotype without reference genotypes. *Nat. Methods* **17**, 615–620 (2020). [doi:10.1038/s41592-020-0820-1](https://doi.org/10.1038/s41592-020-0820-1) [Medline](#)
169. J. Z. Kechagia, J. Ivaska, P. Roca-Cusachs, Integrins as biomechanical sensors of the microenvironment. *Nat. Rev. Mol. Cell Biol.* **20**, 457–473 (2019). [doi:10.1038/s41580-019-0134-2](https://doi.org/10.1038/s41580-019-0134-2) [Medline](#)
170. B. B. Lake, S. Chen, M. Hoshi, N. Plongthongkum, D. Salamon, A. Knoten, A. Vijayan, R. Venkatesh, E. H. Kim, D. Gao, J. Gaut, K. Zhang, S. Jain, A single-nucleus RNA-sequencing pipeline to decipher the molecular anatomy and pathophysiology of human kidneys. *Nat. Commun.* **10**, 2832 (2019). [doi:10.1038/s41467-019-10861-2](https://doi.org/10.1038/s41467-019-10861-2) [Medline](#)
171. B. B. Lake, R. Menon, S. Winfree, Q. Hu, R. M. Ferreira, K. Kalhor, D. Barwinska, E. A. Otto, M. Ferkowicz, D. Diep, N. Plongthongkum, A. Knoten, S. Urata, A. S. Naik, S. Eddy, B. Zhang, Y. Wu, D. Salamon, J. C. Williams, X. Wang, K. S. Balderrama, P. Hoover, E. Murray, A. Vijayan, F. Chen, S. S. Waikar, S. Rosas, F. P. Wilson, P. M. Palevsky, K. Kiryluk, J. R. Sedor, R. D. Toto, C. Parikh, E. H. Kim, E. Z. Macosko, P. V. Kharchenko, J. P. Gaut, J. B. Hodgins, M. T. Eadon, P. C. Dagher, T. M. El-Achkar, K. Zhang, M. Kretzler, S. Jain, An atlas of healthy and injured cell states and niches in the human kidney. *bioRxiv* 2021.07.28.454201 [Preprint] (2021); <https://doi.org/10.1101/2021.07.28.454201>.
172. I. Marek, K. F. Hilgers, W. Rascher, J. Woelfle, A. Hartner, A role for the alpha-8 integrin chain (itga8) in glomerular homeostasis of the kidney. *Mol. Cell Pediatr.* **7**, 13 (2020). [doi:10.1186/s40348-020-00105-5](https://doi.org/10.1186/s40348-020-00105-5) [Medline](#)
173. H. Usui, M. Shibayama, N. Ohbayashi, M. Konishi, S. Takada, N. Itoh, Fgf18 is required for embryonic lung alveolar development. *Biochem. Biophys. Res. Commun.* **322**, 887–892 (2004). [doi:10.1016/j.bbrc.2004.07.198](https://doi.org/10.1016/j.bbrc.2004.07.198) [Medline](#)
174. J. Zammouri, C. Vatier, E. Capel, M. Auclair, C. Storey-London, E. Bismuth, H. Mosbah, B. Donadille, S. Janmaat, B. Fève, I. Jéru, C. Vigouroux, Molecular and cellular bases of

- lipodystrophy syndromes. *Front. Endocrinol.* **12**, 803189 (2022).  
[doi:10.3389/fendo.2021.803189](https://doi.org/10.3389/fendo.2021.803189) [Medline](#)
175. G. Kelsey, O. Stegle, W. Reik, Single-cell epigenomics: Recording the past and predicting the future. *Science* **358**, 69–75 (2017). [doi:10.1126/science.aan6826](https://doi.org/10.1126/science.aan6826) [Medline](#)
176. S. Ma, B. Zhang, L. M. LaFave, A. S. Earl, Z. Chiang, Y. Hu, J. Ding, A. Brack, V. K. Kartha, T. Tay, T. Law, C. Lareau, Y.-C. Hsu, A. Regev, J. D. Buenrostro, Chromatin potential identified by shared single-cell profiling of RNA and chromatin. *Cell* **183**, 1103–1116.e20 (2020). [doi:10.1016/j.cell.2020.09.056](https://doi.org/10.1016/j.cell.2020.09.056) [Medline](#)
177. E. P. Mimitou, C. A. Lareau, K. Y. Chen, A. L. Zorzetto-Fernandes, Y. Hao, Y. Takeshima, W. Luo, T.-S. Huang, B. Z. Yeung, E. Papalexi, P. I. Thakore, T. Kibayashi, J. B. Wing, M. Hata, R. Satija, K. L. Nazer, S. Sakaguchi, L. S. Ludwig, V. G. Sankaran, A. Regev, P. Smibert, Scalable, multimodal profiling of chromatin accessibility, gene expression and protein levels in single cells. *Nat. Biotechnol.* **39**, 1246–1258 (2021).  
[doi:10.1038/s41587-021-00927-2](https://doi.org/10.1038/s41587-021-00927-2) [Medline](#)
178. E. Fiskin, C. A. Lareau, L. S. Ludwig, G. Eraslan, F. Liu, A. M. Ring, R. J. Xavier, A. Regev, Single-cell profiling of proteins and chromatin accessibility using PHAGE-ATAC. *Nat. Biotechnol.* **40**, 374–381 (2022). [doi:10.1038/s41587-021-01065-5](https://doi.org/10.1038/s41587-021-01065-5) [Medline](#)
179. G. Eraslan, The code used in Single-nucleus cross-tissue molecular reference maps toward understanding disease gene function. Zenodo (2022);  
<https://doi.org/10.5281/zenodo.5775379>.
180. L. J. Carithers, K. Ardlie, M. Barcus, P. A. Branton, A. Britton, S. A. Buia, C. C. Compton, D. S. DeLuca, J. Peter-Demchok, E. T. Gelfand, P. Guan, G. E. Korzeniewski, N. C. Lockhart, C. A. Rabiner, A. K. Rao, K. L. Robinson, N. V. Roche, S. J. Sawyer, A. V. Segrè, C. E. Shive, A. M. Smith, L. H. Sobin, A. H. Undale, K. M. Valentino, J. Vaught, T. R. Young, H. M. Moore, GTEx Consortium, A novel approach to high-quality postmortem tissue procurement: The GTEx project. *Biopreserv. Biobank.* **13**, 311–319 (2015). [doi:10.1089/bio.2015.0032](https://doi.org/10.1089/bio.2015.0032) [Medline](#)
181. M. D. Young, S. Behjati, SoupX removes ambient RNA contamination from droplet-based single-cell RNA sequencing data. *Gigascience* **9**, gaa151 (2020).  
[doi:10.1093/gigascience/gaa151](https://doi.org/10.1093/gigascience/gaa151) [Medline](#)
182. R. T. Q. Chen, X. Li, R. Grosse, D. Duvenaud, Isolating sources of disentanglement in variational autoencoders. [arXiv:1802.04942](https://arxiv.org/abs/1802.04942) [cs.LG] (2018).
183. F. A. Wolf, P. Angerer, F. J. Theis, SCANPY: Large-scale single-cell gene expression data analysis. *Genome Biol.* **19**, 15 (2018). [doi:10.1186/s13059-017-1382-0](https://doi.org/10.1186/s13059-017-1382-0) [Medline](#)
184. I. Korsunsky, N. Millard, J. Fan, K. Slowikowski, F. Zhang, K. Wei, Y. Baglaenko, M. Brenner, P.-R. Loh, S. Raychaudhuri, Fast, sensitive and accurate integration of single-cell data with Harmony. *Nat. Methods* **16**, 1289–1296 (2019). [doi:10.1038/s41592-019-0619-0](https://doi.org/10.1038/s41592-019-0619-0) [Medline](#)
185. L. Haghverdi, A. T. L. Lun, M. D. Morgan, J. C. Marioni, Batch effects in single-cell RNA-sequencing data are corrected by matching mutual nearest neighbors. *Nat. Biotechnol.* **36**, 421–427 (2018). [doi:10.1038/nbt.4091](https://doi.org/10.1038/nbt.4091) [Medline](#)
186. K. Polański, M. D. Young, Z. Miao, K. B. Meyer, S. A. Teichmann, J.-E. Park, BBKNN:

- Fast batch alignment of single cell transcriptomes. *Bioinformatics* **36**, 964–965 (2020). [Medline](#)
187. M. D. Luecken, M. Büttner, K. Chaichoompu, A. Danese, M. Interlandi, M. F. Mueller, D. C. Strobl, L. Zappia, M. Dugas, M. Colomé-Tatché, F. J. Theis, Benchmarking atlas-level data integration in single-cell genomics. *Nat. Methods* **19**, 41–50 (2022). [doi:10.1038/s41592-021-01336-8](https://doi.org/10.1038/s41592-021-01336-8) [Medline](#)
188. M. Büttner, Z. Miao, F. A. Wolf, S. A. Teichmann, F. J. Theis, A test metric for assessing single-cell RNA-seq batch correction. *Nat. Methods* **16**, 43–49 (2019). [doi:10.1038/s41592-018-0254-1](https://doi.org/10.1038/s41592-018-0254-1) [Medline](#)
189. J. T. Leek, W. E. Johnson, H. S. Parker, A. E. Jaffe, J. D. Storey, The sva package for removing batch effects and other unwanted variation in high-throughput experiments. *Bioinformatics* **28**, 882–883 (2012). [doi:10.1093/bioinformatics/bts034](https://doi.org/10.1093/bioinformatics/bts034) [Medline](#)
190. T. Derrien, J. Estellé, S. Marco Sola, D. G. Knowles, E. Raineri, R. Guigó, P. Ribeca, Fast computation and applications of genome mappability. *PLOS ONE* **7**, e30377 (2012). [doi:10.1371/journal.pone.0030377](https://doi.org/10.1371/journal.pone.0030377) [Medline](#)
191. J. Bergstra, D. Yamins, D. Cox, “Making a science of model search: Hyperparameter optimization in hundreds of dimensions for vision architectures” in *Proceedings of the 30th International Conference on Machine Learning* (JMLR, 2013), pp. 115–123.
192. F. A. Wolf, F. Hamey, M. Plass, J. Solana, J. S. Dahlin, B. Göttgens, N. Rajewsky, L. Simon, F. J. Theis, PAGA: Graph abstraction reconciles clustering with trajectory inference through a topology preserving map of single cells. *Genome Biol.* **20**, 59 (2019). [doi:10.1186/s13059-019-1663-x](https://doi.org/10.1186/s13059-019-1663-x) [Medline](#)
193. L. Garcia-Alonso, C. H. Holland, M. M. Ibrahim, D. Turei, J. Saez-Rodriguez, Benchmark and integration of resources for the estimation of human transcription factor activities. *Genome Res.* **29**, 1363–1375 (2019). [doi:10.1101/gr.240663.118](https://doi.org/10.1101/gr.240663.118) [Medline](#)
194. C. H. Holland, J. Tanevski, J. Perales-Patón, J. Gleixner, M. P. Kumar, E. Mereu, B. A. Joughin, O. Stegle, D. A. Lauffenburger, H. Heyn, B. Szalai, J. Saez-Rodriguez, Robustness and applicability of transcription factor and pathway analysis tools on single-cell RNA-seq data. *Genome Biol.* **21**, 36 (2020). [doi:10.1186/s13059-020-1949-z](https://doi.org/10.1186/s13059-020-1949-z) [Medline](#)
195. M. Gerlach, T. P. Peixoto, E. G. Altmann, A network approach to topic models. *Sci. Adv.* **4**, eaaq1360 (2018). [doi:10.1126/sciadv.aaq1360](https://doi.org/10.1126/sciadv.aaq1360) [Medline](#)
196. X. Wen, R. Pique-Regi, F. Luca, Integrating molecular QTL data into genome-wide genetic association analysis: Probabilistic assessment of enrichment and colocalization. *PLOS Genet.* **13**, e1006646 (2017). [doi:10.1371/journal.pgen.1006646](https://doi.org/10.1371/journal.pgen.1006646) [Medline](#)
197. X. Zheng-Bradley, I. Streeter, S. Fairley, D. Richardson, L. Clarke, P. Flicek, 1000 Genomes Project Consortium, Alignment of 1000 Genomes Project reads to reference assembly GRCh38. *Gigascience* **6**, 1–8 (2017). [Medline](#)
198. B. Li, J. Gould, Y. Yang, S. Sarkizova, M. Tabaka, O. Ashenberg, Y. Rosen, M. Slyper, M. S. Kowalczyk, A.-C. Villani, T. Tickle, N. Hacohen, O. Rozenblatt-Rosen, A. Regev, Cumulus provides cloud-based data analysis for large-scale single-cell and single-nucleus RNA-seq. *Nat. Methods* **17**, 793–798 (2020). [doi:10.1038/s41592-020-0905-x](https://doi.org/10.1038/s41592-020-0905-x) [Medline](#)
